# Supplementary material for: Engineering selective competitors for the discrimination of highly conserved protein-protein interaction modules
Source: Nat Commun. 2019 Oct 4;10:4521. doi: 10.1038/s41467-019-12528-4 (PMC6778148; doi:10.1038/s41467-019-12528-4)
Supplement: Supplementary file 4 — Source Data [file 41467_2019_12528_MOESM4_ESM.xlsx]

## Sheet: Fig2c SuppFig3
Figure 2c	Heatmap for selectivity by phage-ELISA (n=2)
also used for Supp Fig 3
	Phage ELISA#1		Xph15	Xph16	Xph17	Xph18	Xph19	Xph20	Xph21	Xph22	Xph23	Xph24	Xph25
	(OD @ 450 nm)	biotine	0.072	0.0485	0.0215	0.074	0.019	0.022	0.013	0.0115	0.012	0.014	0.014
		95-2	0.092	0.682	0.045	0.2225	0.031	0.025	0.0175	0.0205	0.0225	0.0175	0.0165
		102-12	0.091	0.4205	0.0385	0.1535	0.0305	0.0235	0.0235	0.0235	0.026	0.022	0.018
		93-12	0.0675	0.088	0.027	0.379	1.069	0.0185	0.0135	0.039	0.0135	0.168	0.0135
		97-12	0.1015	1.043	0.047	0.146	1.6835	0.0445	0.0265	0.1335	0.0385	0.1455	0.025
		95-12	2.9345	2.509	2.7765	2.851	2.876	2.845	2.6555	2.085	2.904	2.7685	2.7775
	Phage ELISA#2		Xph15	Xph16	Xph17	Xph18	Xph19	Xph20	Xph21	Xph22	Xph23	Xph24	Xph25
	(OD @ 450 nm)	biotine	0.0265	0.0305	0.0205	0.028	0.015	0.017	0.0145	0.017	0.015	0.017	0.0145
		95-2	0.064	0.5945	0.054	0.068	1.0105	0.0435	0.025	0.0665	0.03	0.142	0.0255
		102-12	0.0565	0.4275	0.046	0.0715	0.0215	0.0215	0.0195	0.0225	0.0165	0.022	0.0175
		93-12	0.0365	0.046	0.0335	0.083	0.3265	0.0225	0.0145	0.0235	0.0155	0.1115	0.0165
		97-12	0.0585	0.2975	0.0435	0.069	0.027	0.027	0.023	0.0265	0.023	0.03	0.022
		95-12	3.0235	2.5615	2.9385	2.953	2.977	2.908	2.6175	2.1005	2.783	2.767	2.7035

## Sheet: Fig2d
Figure 2d	Heatmap for selectivity by pull-down (n=1)
		Xph15	Xph16	Xph17	Xph18	Xph19	Xph20	Xph21	Xph24	Xph25
	PSD-95-12	0.82	0.37	0.73	0.99	1.5	1.49	0.67	0.96	0.85
	SAP97-12	0	0	0	0	0	0	0	0.09	0
	PSD-93-12	0	0.35	0	0	0.92	0	0	0.73	0
	SAP102-12	0	0.03	0	0	0.12	0.23	0	0.01	0.02

## Sheet: Fig2f
Figure 2f	FRET-FLIM
	each data point corresponds to the averaged lifetime measured for a cell
		PSD-95 (eGFP lifetime in ns)											SAP97 (eGFP lifetime in ns)											PSD-95 (C3S/C5S) (eGFP lifetime in ns)
		Donor Alone	vs Stargazin	Vs Xph0	vs Xph15	vs Xph17	vs Xph18	vs Xph19	vs Xph20	vs Xph24	vs Xph25		Donor Alone	vs Stargazin	Vs Xph0	vs Xph15	vs Xph17	vs Xph18	vs Xph19	vs Xph20	vs Xph24	vs Xph25		Donor Alone	vs Stargazin	Vs Xph0	vs Xph15	vs Xph17	vs Xph18	vs Xph19	vs Xph20	vs Xph24	vs Xph25
		2.47	2.07	2.507	2.106	2.14	2.161	2.113	2.179	2.241	2.318		2.535	2.124	2.482	2.378	2.401	2.396	2.466	2.341	2.463	2.401		2.512	1.954	2.43	2.288	2.138	2.123	2.328	2.074	2.19	2.194
		2.464	2.043	2.45	2.149	2.123	2.244	2.103	2.241	2.214	2.247		2.55	2.249	2.476	2.396	2.447	2.313	2.516	2.367	2.31	2.287		2.452	2.363	2.473	2.341	2.143	2.31	2.347	2.05	2.074	2.242
		2.517	2.031	2.44	2.114	2.287	2.104	2.095	2.008	2.182	2.289		2.502	1.906	2.414	2.456	2.332	2.458	2.431	2.364	2.332	2.138		2.516	2.132	2.489	2.347	2.213	2.18	2.324	2.07	2.358	2.216
		2.539	2.08	2.475	2.217	2.131	2.064	2.156	2.097	2.193	2.267		2.448	1.952	2.496	2.449	2.344	2.479	2.319	2.447	2.375	2.408		2.532	2.127	2.494	2.434	2.247	2.211	2.289	2.149	2.375	2.233
		2.508	1.903	2.427	2.247	2.111	2.112	2.369	2.101	2.259	2.137		2.511	2.198	2.422	2.429	2.383	2.461	2.389	2.462	2.331	2.44		2.556	2.334	2.47	2.252	2.165	2.175	2.327	2.081	2.286	2.254
		2.529	1.83	2.464	2.29	2.152	2.154	2.082	2.2	2.075	2.234		2.544	2.341	2.462	2.263	2.451	2.415	2.376	2.397	2.386	2.47		2.533	2.082	2.494	2.177	2.175	2.17	2.216	2.081	2.122	2.263
		2.537	2.021	2.367	2.347	2.248	2.007	2.238	2.074	2.103	2.208		2.481	1.935	2.495	2.374	2.42	2.378	2.448	2.35	2.427	2.238		2.506	2.198	2.478	2.262	2.026	2.189	2.336	2.214	2.351	2.169
		2.556	2.141	2.389	2.316	2.181	2.247	2.328	2.007	2.211	2.122		2.509	2.002	2.505	2.395	2.455	2.388	2.394	2.461	2.407	2.407		2.535	2.031	2.421	2.28	2.202	2.164	2.238	2.209	2.333	2.261
		2.534	2.472	2.347	2.082	2.002	2.318	2.229	2.099	2.083	2.363		2.497	1.962	2.455	2.207	2.41	2.26	2.45	2.332	2.474	2.448		2.519	1.985	2.469	2.201	2.288	2.177	2.253	2.123	2.376	2.249
		2.475	1.987	2.369	2.178	2.02	2.163	2.132	2.162	2.018	2.297		2.523	2.254		2.397	2.453	2.352	2.396	2.349	2.379	2.395		2.509	1.906	2.505	2.259	2.147	2.34	2.254	2.222	2.256	2.257
		2.546	2.031	2.494	2.222	2.057	2.186	2.191	2.11		2.127		2.486	2.176		2.374	2.413	2.46	2.413	2.275	2.322	2.418		2.535	2.011	2.535	2.404		2.327	2.304		2.242
		2.554		2.478	2.182	2.218	2.145	2.183					2.494	2.271		2.43	2.401	2.381	2.413	2.431				2.53	2.198	2.508	2.24		2.307	2.296		2.234
		2.533		2.476	2.084	2.176	2.255	2.064					2.545			2.443	2.41	2.39	2.399	2.417					1.947	2.514	2.213		2.102	2.289
		2.517		2.447	2.204	2.1	2.153	2.172					2.547			2.388	2.419	2.401	2.424	2.354					2.294	2.514	2.121		2.237	2.272
		2.539		2.485	2.202	2.122	2.11	2.186					2.536			2.396	2.442	2.472	2.399	2.461					2.313	2.503			2.298	2.32
		2.519		2.491		2.116	2.186	2.258					2.526						2.445	2.441					2.089	2.527			2.165	2.339
		2.525		2.499		2.031	2.078	2.223					2.45						2.376	2.421					2.059	2.519			2.254
		2.514		2.467				2.275					2.513							2.391					2.417	2.464			2.216
		2.505		2.481				2.053					2.516							2.432					2.523	2.49			2.215
		2.478		2.44				2.114												2.393					2.244	2.505			2.102
		2.496		2.474				2.09																	2.125	2.498			2.102
				2.435				1.981																	2.056	2.518			2.307
				2.484				2.213																	2.287	2.519			2.28
				2.476				2.176																	2.252				2.194
								2.131																	2.165				2.162
								2.172																	2.253				2.214
								2.169																	1.869				2.226
								2.305																	2.224				2.149
																									1.87
																									2.154
																									1.905
																									2.08
																									2.113
																									2.04
																									2.307

## Sheet: Fig3
Figure 3	15N-HSQC NMR spectrum of bound and unbound PSD-95-12
	PDZ12 residue	15N PSD-95-12	15N	1H		+Xph15sumo	15N	1H		+Xph18sumo	15N	1H		+Xph20sumo	15N	1H		+Xph15 Δδ(HN)	+Xph18 Δδ(HN)	+Xph20 Δδ(HN)
	60	S60N-H	116.351	8.448						S60N-H	116.189	8.323		S60N-H	116.18	8.375			0.127041	0.0768253
	61	M61N-H	121.014	8.252		M61N-H	121.2	8.324						M61N-H	122.974	8.349		0.0765642		0.29104
	62	E62N-H	122.934	8.878		E62N-H	121.863	8.798		E62N-H	123.063	8.866		E62N-H	121.607	8.831		0.169947	0.0216833	0.191633
	63	Y63N-H	121.208	8.404		Y63N-H	121.251	8.719		Y63N-H	122.381	8.771		Y63N-H	122.563	8.613		0.315058	0.402066	0.282254
	64	E64N-H	122.172	8.641		E64N-H	123.656	8.988		E64N-H	122.753	8.61		E64N-H	123.915	8.957		0.404442	0.0870471	0.399252
	65	E65N-H	125.704	8.645		E65N-H	127.48	9.55		E65N-H	124.97	8.582		E65N-H	126.133	8.022		0.938534	0.120535	0.625888
	66	I66N-H	130.341	9.337		I66N-H	128.066	9.068		I66N-H	127.598	9.069		I66N-H	127.698	9.27		0.416897	0.46829	0.376037
	67	T67N-H	124.249	7.605		T67N-H	127.64	7.806		T67N-H	124.301	7.589		T67N-H	127.688	7.636		0.515538	0.0175784	0.482457
	68	L68N-H	125.403	9.066		L68N-H	126.036	9.205		L68N-H	125.896	9.051		L68N-H	125.793	9.184		0.164847	0.0706312	0.13002
	69	E69N-H	122.172	8.639		E69N-H	122.577	8.651		E69N-H	122.661	8.669		E69N-H	122.76	8.699		0.0579559	0.0747447	0.101866
	70	R70N-H	125.894	8.755		R70N-H	126.513	8.824		R70N-H	126.259	8.772		R70N-H	126.378	8.772		0.110774	0.0538536	0.06986
	71	G71N-H	111.21	7.895		G71N-H	111.182	7.823		G71N-H	110.596	7.861		G71N-H	110.475	7.88		0.0721066	0.0924398	0.103988
	72
	73
	74	G74N-H	108.67	7.746		G74N-H	108.771	7.716		G74N-H	108.699	7.679		G74N-H	108.867	7.702		0.0331653	0.0671229	0.0519293
	75
	76	G76N-H	103.903	8.551		G76N-H	103.842	8.565		G76N-H	103.774	8.53		G76N-H	103.88	8.572		0.0163991	0.0276977	0.0212454
	77	F77N-H	115.293	7.341		F77N-H	115.532	7.326		F77N-H	115.276	7.298		F77N-H	115.447	7.341		0.0366684	0.0430658	0.02156
	78	S78N-H	116.592	8.701		S78N-H	116.552	8.724		S78N-H	116.508	8.652		S78N-H	116.49	8.68		0.0236719	0.0503914	0.0253952
	79	I79N-H	114.184	8.58		I79N-H	114.095	8.556		I79N-H	114.149	8.578		I79N-H	114.144	8.581		0.0270417	0.00529245	0.00568859
	80	A80N-H	122.507	9.129		A80N-H	122.439	9.103		A80N-H	122.413	9.069		A80N-H	122.473	9.104		0.0276881	0.0614263	0.0254491
	81	G81N-H	106.791	8.711		G81N-H	107.02	8.705		G81N-H	107.199	8.725		G81N-H	106.981	8.727		0.0326166	0.0588107	0.0310413
	82	G82N-H	107.517	6.702		G82N-H	106.879	6.62		G82N-H	106.952	6.632		G82N-H	107.546	6.683		0.121252	0.105626	0.0194289
	83	T83N-H	111.476	9.192		T83N-H	111.199	9.172		T83N-H	111.336	9.167		T83N-H	111.559	9.182		0.0436336	0.0317673	0.0153305
	84	D84N-H	115.689	9.615		D84N-H	115.657	9.606		D84N-H	115.682	9.676		D84N-H	115.734	9.615		0.0100534	0.0610079	0.0063
	85	N85N-H	117.353	7.185		N85N-H	117.315	7.173		N85N-H	116.926	7.111		N85N-H	117.414	7.194		0.0131264	0.0951296	0.0124069
	86
	87	H87N-H	124.821	10.441		H87N-H	125.639	10.556		H87N-H	125.28	10.455		H87N-H	125.001	10.476		0.162296	0.0657674	0.0431282
	88	I88N-H	115.023	6.908		I88N-H	114.644	6.814		I88N-H	114.65	6.792		I88N-H	115.027	6.898		0.107941	0.127212	0.0100157
	89	G89N-H	114.104	8.542		G89N-H	114.187	8.563		G89N-H	114.314	8.566		G89N-H	114.232	8.569		0.0240005	0.0379521	0.0324057
	90	D90N-H	124.06	8.467		D90N-H	124.146	8.468		D90N-H	123.761	8.395		D90N-H	124.091	8.46		0.0120815	0.0832842	0.00823624
	91	D91N-H	123.316	8.31		D91N-H	123.557	8.32		D91N-H	124.06	8.307		D91N-H	123.305	8.308		0.0351907	0.104203	0.0025242
	92
	93	S93N-H	116.853	8.304		S93N-H	116.693	8.3		S93N-H	116.807	8.286		S93N-H	116.945	8.276		0.0227543	0.0191174	0.0308204
	94	I94N-H	123.149	9.405		I94N-H	123.115	9.451		I94N-H	123.266	9.256		I94N-H	123.341	9.486		0.0462456	0.149898	0.0853436
	95	F95N-H	125.142	8.892		F95N-H	125.14	8.919		F95N-H	125.683	8.961		F95N-H	124.961	8.892		0.0270015	0.102458	0.02534
	96	I96N-H	119.141	8.715		I96N-H	118.946	8.659		I96N-H	118.868	8.67		I96N-H	119.053	8.706		0.0623	0.0590404	0.0152572
	97	T97N-H	118.255	8.761		T97N-H	118.293	8.757		T97N-H	118.482	8.746		T97N-H	118.349	8.758		0.006656	0.0351421	0.0134976
	98	K98N-H	120.766	7.149		K98N-H	120.753	7.144		K98N-H	120.865	7.118		K98N-H	121.041	7.158		0.00532094	0.0339573	0.039538
	99	I99N-H	125.894	8.848		I99N-H	125.984	8.862		I99N-H	125.819	8.831		I99N-H	125.978	8.841		0.0188351	0.0199812	0.0136857
	100	I100N-H	128.809	8.003		I100N-H	128.921	7.956		I100N-H	129.093	7.998		I100N-H	129.044	8		0.0495466	0.0400732	0.0330365
	101
	102	G102N-H	111.886	8.733		G102N-H	112.111	8.768		G102N-H	112.073	8.742		G102N-H	111.97	8.754		0.0470877	0.0276838	0.0240686
	103	G103N-H	106.581	7.587		G103N-H	106.554	7.579		G103N-H	106.604	7.567		G103N-H	106.58	7.587		0.00884807	0.0202576	0.00014
	104	A104N-H	119.831	8.539		A104N-H	119.961	8.561		A104N-H	119.917	8.516		A104N-H	119.966	8.544		0.0285524	0.0259608	0.0195502
	105	A105N-H	118.796	8.092		A105N-H	118.876	8.042		A105N-H	118.83	8.071		A105N-H	118.862	8.079		0.051239	0.0215327	0.0159492
	106	A106N-H	127.14	9.751		A106N-H	127.208	9.816		A106N-H	127.256	9.727		A106N-H	127.25	9.764		0.0656935	0.0289782	0.0201534
	107	Q107N-H	116.913	8.332		Q107N-H	116.882	8.324		Q107N-H	116.852	8.307		Q107N-H	116.882	8.314		0.00910141	0.0264184	0.0185158
	108	D108N-H	118.135	7.73		D108N-H	118.135	7.681		D108N-H	118.351	7.685		D108N-H	118.163	7.681		0.049	0.0542168	0.0491565
	109	G109N-H	102.971	7.578		G109N-H	103.015	7.586		G109N-H	103.068	7.54		G109N-H	103.083	7.562		0.0100968	0.0403536	0.0224023
	110	R110N-H	119.964	7.748		R110N-H	119.944	7.784		R110N-H	120.006	7.725		R110N-H	120.089	7.754		0.0361087	0.0237397	0.0185
	111	L111N-H	120.638	9.153		L111N-H	120.833	9.136		L111N-H	120.811	9.129		L111N-H	121.033	9.172		0.0321604	0.034097	0.058473
	112	R112N-H	122.792	8.715		R112N-H	122.628	8.661		R112N-H	122.74	8.622		R112N-H	123.433	8.688		0.0586785	0.0932845	0.0937138
	113	V113N-H	120.486	8.338		V113N-H	120.804	8.384		V113N-H	120.379	8.329		V113N-H	120.718	8.35		0.0640159	0.0174757	0.0346259
	114	N114N-H	120.746	9.456		N114N-H	120.76	9.448		N114N-H	120.814	9.426		N114N-H	120.948	9.472		0.0082366	0.0314743	0.0324924
	115	D115N-H	122.874	8.083		D115N-H	122.628	8.076		D115N-H	122.533	8.072		D115N-H	122.838	8.08		0.0351442	0.0489909	0.00586529
	116	S116N-H	115.563	8.953		S116N-H	115.404	8.845		S116N-H	115.42	8.929		S116N-H	115.633	8.973		0.11027	0.0312538	0.022272
	117	I117N-H	123.316	8.285		I117N-H	123.558	8.319		I117N-H	123.08	8.255		I117N-H	123.337	8.418		0.0479985	0.0446278	0.133032
	118	L118N-H	126.975	9.378		L118N-H	125.76	9.513		L118N-H	126.813	9.362		L118N-H	125.808	9.49		0.217161	0.0277558	0.198083
	119	F119N-H	111.761	7.457		F119N-H	113.702	7.758		F119N-H	112.439	7.485		F119N-H	113.393	7.708		0.405516	0.0989637	0.339417
	120	V120N-H	120.897	8.773		V120N-H	120.521	8.844		V120N-H	119.815	8.641		V120N-H	120.573	8.842		0.0883853	0.200923	0.0825744
	121	N121N-H	126.516	10.125		N121N-H	125.209	9.698		broad	broad	broad		N121N-H	125.689	9.74		0.464554	99.99	0.402032
	122
	123	V123N-H	124.648	9.006		V123N-H	123.859	8.932		V123N-H	123.841	8.866		V123N-H	123.652	8.911		0.132956	0.179901	0.168726
	124	D124N-H	128.305	8.469		D124N-H	128.268	8.252		D124N-H	127.96	8.355		D124N-H	128.534	8.277		0.217062	0.12381	0.194658
	125	V125N-H	120.787	8.281		V125N-H	120.254	8.269		V125N-H	120.482	8.287		V125N-H	120.303	8.286		0.0755787	0.0431195	0.0679442
	126	R126N-H	122.714	8.237		R126N-H	121.768	8.114		R126N-H	122.736	8.214		R126N-H	121.708	8.12		0.180747	0.0232053	0.183098
	127	E127N-H	120.646	8.386		E127N-H	120.306	8.427		E127N-H	120.663	8.364		E127N-H	120.361	8.42		0.0628232	0.0221284	0.0524215
	128	V128N-H	118.69	9.531		V128N-H	118.766	9.57		V128N-H	118.651	9.488		V128N-H	118.835	9.556		0.0404254	0.0433453	0.0322039
	129	T129N-H	109.487	7.911		T129N-H	109.532	7.885		T129N-H	109.504	7.873		T129N-H	109.655	7.911		0.0267524	0.0380745	0.02352
	130	H130N-H	122.62	10.385		H130N-H	123.116	10.292		H130N-H	122.823	10.22		H130N-H	122.697	10.373		0.116064	0.16743	0.016131
	131	S131N-H	111.12	9.353		S131N-H	110.638	9.315		S131N-H	110.878	9.302		S131N-H	111.182	9.363		0.0774439	0.0612279	0.0132417
	132	A132N-H	125.36	7.81		A132N-H	125.358	7.8		A132N-H	125.233	7.744		A132N-H	125.412	7.815		0.0100039	0.068353	0.00883167
	133	A133N-H	123.42	7.923		A133N-H	123.87	8.001		A133N-H	123.381	7.841		A133N-H	123.511	7.955		0.100265	0.0821816	0.0344428
	134	V134N-H	118.074	8.059		V134N-H	118.139	8.12		V134N-H	118.253	8.071		V134N-H	118.095	8.056		0.061675	0.027785	0.00420043
	135	E135N-H	120.446	8.362		E135N-H	120.718	8.362		E135N-H	120.355	8.32		E135N-H	120.389	8.385		0.03808	0.0438897	0.024345
	136	A136N-H	121.154	8.082		A136N-H	121.08	8.104		A136N-H	121.567	8.058		A136N-H	121.095	8.11		0.0243173	0.0626031	0.0291929
	137	L137N-H	116.149	7.75		L137N-H	115.966	7.781		L137N-H	116.159	7.79		L137N-H	116.105	7.77		0.0402167	0.0400245	0.0209271
	138	K138N-H	121.911	8.091						K138N-H	121.658	8.079		K138N-H	121.903	8.103			0.0373975	0.0120522
	139	E139N-H	115.749	8.187		E139N-H	115.649	8.216		E139N-H	116.686	8.15		E139N-H	115.841	8.23		0.0322025	0.136298	0.0448876
	140	A140N-H	119.864	6.928		A140N-H	119.848	6.871		A140N-H	119.829	6.864		A140N-H	119.971	6.906		0.057044	0.0641873	0.0266158
	141	G141N-H	104.061	8.008		G141N-H	103.878	7.939		G141N-H	103.936	7.982		G141N-H	103.49	7.884		0.0736029	0.0313409	0.147534
	142	S142N-H	115.368	8.633		S142N-H	115.059	8.61						S142N-H	115.451	8.616		0.0489942		0.0205919
	143	I143N-H	121.05	7.63		I143N-H	121.461	7.814		I143N-H	121.276	7.784		I143N-H	121.327	7.861		0.192787	0.157217	0.234233
	144	V144N-H	128.092	9.183		V144N-H	127.966	9.226		V144N-H	128.116	9.222		V144N-H	127.569	9.243		0.0464776	0.0391445	0.0946634
	145	R145N-H	128.072	8.944		R145N-H	126.054	9.022		broad	broad	broad		R145N-H	126.456	9.043		0.29309	99.99	0.246953
	146	L146N-H	127.791	9.559		L146N-H	128.934	9.177		broad	broad	broad		L146N-H	128.856	9.321		0.414162	99.99	0.280847
	147	Y147N-H	126.146	8.53		Y147N-H	124.951	8.79		broad	broad	broad		Y147N-H	125.054	8.832		0.309175	99.99	0.338491
	148	V148N-H	121.69	8.854		V148N-H	122.063	9.168		V148N-H	121.66	8.845		V148N-H	121.964	8.733		0.318313	0.00993177	0.126935
	149	M149N-H	119.523	8.801		M149N-H	118.109	8.613		M149N-H	119.243	8.79		M149N-H	117.331	8.669		0.273006	0.0407141	0.334065
	150	R150N-H	123.256	8.976						broad	broad	broad		R150N-H	121.281	9.153			99.99	0.328301
	151	R151N-H	121.449	8.354										R151N-H	120.978	8.444				0.111571
	152	K152N-H	125.419	8.488										K152N-H	125.61	8.63				0.144496
	153
	154
	155	A155N-H	124.801	8.408		A155N-H	124.717	8.381		broad	broad	broad		A155N-H	124.858	8.382		0.0294499	99.99	0.0271971
	156									E156N-H	123.713	7.975		E156N-H	120.326	8.292		0
	157					K157HN-H	123.093	8.635		broad	broad	broad		K157N-H	123.393	8.588			99.99
	158	V158N-H	124.179	8.245		V158N-H	123.905	8.237		broad	broad	broad		V158N-H	123.799	8.232		0.0391853	99.99	0.0547653
	159	M159N-H	125.343	9.309		M159N-H	125.45	9.323		broad	broad	broad		M159N-H	125.52	9.31		0.0205037	99.99	0.0248002
	160	E160N-H	123.035	8.566		E160N-H	123.179	8.565		E160N-H	123.388	8.554		E160N-H	123.254	8.561		0.0201848	0.050856	0.031065
	161	I161N-H	125.684	9.13		I161N-H	125.859	9.138		broad	broad	broad		I161N-H	125.948	9.131		0.025773	99.99	0.0369735
	162	K162N-H	128.434	7.645		K162N-H	128.701	7.643		K162N-H	129.8	7.663		K162N-H	128.795	7.641		0.0374335	0.192085	0.050698
	163	L163N-H	125.463	9.056		L163N-H	125.415	9.046		L163N-H	125.94	9.047		L163N-H	125.562	9.055		0.0120482	0.0673837	0.013896
	164	I164N-H	121.851	8.398		I164N-H	121.935	8.412		I164N-H	121.659	8.291		I164N-H	122.012	8.412		0.0182838	0.110325	0.026534
	165	K165N-H	127.551	8.815		K165N-H	127.547	8.812		K165N-H	127.669	8.838		K165N-H	127.643	8.818		0.00305182	0.028318	0.0132248
	166	G166N-H	112.659	7.639		G166N-H	112.65	7.641		G166N-H	113.053	7.643		G166N-H	112.69	7.645		0.00236381	0.0553048	0.00740511
	167
	168
	169	G169N-H	106.956	8.011		G169N-H	107.169	8.021		G169N-H	107.317	8.034		G169N-H	107.253	8.023		0.0314521	0.0555274	0.043277
	170
	171	G171N-H	104.614	8.616						G171N-H	104.685	8.62		G171N-H	104.885	8.696			0.0107146	0.0885406
	172	F172N-H	115.562	7.469		F172N-H	115.708	7.493		F172N-H	115.876	7.462		F172N-H	115.809	7.505		0.0315245	0.0445138	0.0499177
	173	S173N-H	116.452	8.649		S173N-H	116.233	8.626		S173N-H	116.442	8.633		S173N-H	116.166	8.627		0.038328	0.0160611	0.0456859
	174	I174N-H	114.104	8.508		I174N-H	114.12	8.5		I174N-H	114.198	8.483		I174N-H	114.09	8.507		0.00830768	0.0282522	0.00220036
	175	A175N-H	122.493	9.13		A175N-H	122.318	9.089		A175N-H	122.413	9.069		A175N-H	122.606	9.087		0.0477624	0.0620197	0.0458178
	176	G176N-H	106.296	8.5		G176N-H	106.482	8.447		G176N-H	106.478	8.457		G176N-H	106.522	8.516		0.0590515	0.0499823	0.0354555
	177	G177N-H	106.474	6.612		G177N-H	106.13	6.572		G177N-H	106.404	6.542		G177N-H	106.512	6.613		0.062605	0.0706827	0.00541317
	178	V178N-H	119.603	8.589		V178N-H	119.721	8.561		V178N-H	119.97	8.632		V178N-H	120.107	8.556		0.0325102	0.0669993	0.0778955
	179	G179N-H	116.374	9.168		G179N-H	116.515	9.191		G179N-H	116.697	9.198		G179N-H	116.75	9.175		0.0303095	0.0542665	0.0531034
	180	N180N-H	122.373	8.241		N180N-H	122.684	8.257		N180N-H	122.897	8.269		N180N-H	122.744	8.265		0.0463868	0.0785219	0.0572168
	181	Q181N-H	117.917	8.358		Q181N-H	117.767	8.339		Q181N-H	117.763	8.344		Q181N-H	117.954	8.37		0.0283196	0.0257067	0.0130703
	182	H182N-H	125.603	10.227		H182N-H	125.877	10.25		H182N-H	125.97	10.245		H182N-H	125.692	10.245		0.0447268	0.0544418	0.0218918
	183	I183N-H	117.642	6.948		I183N-H	117.652	6.909		I183N-H	118.019	6.925		I183N-H	117.725	6.929		0.0390251	0.0575737	0.0222716
	184
	185	G185N-H	112.202	8.355		G185N-H	112.313	8.387		G185N-H	112.464	8.363		G185N-H	112.399	8.393		0.0355737	0.0375423	0.0469538
	186	D186N-H	122.192	8.193		D186N-H	122.001	8.185		D186N-H	122.208	8.191		D186N-H	121.909	8.177		0.0279111	0.00300293	0.0427287
	187	N187N-H	124.513	9.324		N187N-H	124.685	9.33		N187N-H	124.725	9.374		N187N-H	124.76	9.327		0.0248163	0.0581455	0.0347099
	188	S188N-H	116.372	8.896		S188N-H	116.394	8.88		S188N-H	116.736	8.93		S188N-H	116.367	8.88		0.0162938	0.0612611	0.0160153
	189	I189N-H	122.914	8.849		I189N-H	123.045	8.874		I189N-H	123.071	8.919		I189N-H	123.101	8.9		0.0310057	0.0733698	0.0573271
	190	Y190N-H	124.239	8.757		Y190N-H	124.455	8.746		Y190N-H	124.499	8.748		Y190N-H	124.571	8.755		0.0321785	0.0374961	0.046523
	191	V191N-H	119.603	8.769		V191N-H	119.516	8.739		V191N-H	119.536	8.661		V191N-H	119.669	8.746		0.0323783	0.108407	0.0247866
	192	T192N-H	118.238	8.827		T192N-H	118.234	8.83		T192N-H	118.403	8.842		T192N-H	118.334	8.831		0.00305182	0.0275429	0.0140226
	193	K193N-H	120.827	7.143		K193N-H	120.925	7.142		K193N-H	120.866	7.118		K193N-H	120.797	7.141		0.0137564	0.0255893	0.00465188
	194	I194N-H	125.122	8.611		I194N-H	125.135	8.597		I194N-H	125.292	8.611		I194N-H	125.221	8.599		0.0141178	0.0238	0.018333
	195	I195N-H	127.006	8.017		I195N-H	127.19	8.018		I195N-H	127.188	7.94		I195N-H	127.232	8.016		0.0257794	0.0811063	0.0316558
	196	E196N-H	132.354	9.131		E196N-H	132.553	9.15		E196N-H	132.824	9.154		E196N-H	132.629	9.156		0.0337221	0.0697039	0.0459048
	197	G197N-H	115.928	9.494		G197N-H	116.061	9.518		G197N-H	116.181	9.533		G197N-H	116.086	9.515		0.030376	0.0526837	0.0305007
	198	G198N-H	106.058	7.722		G198N-H	106.004	7.722		G198N-H	106.098	7.72		G198N-H	106.073	7.729		0.00756	0.00594643	0.00730821
	199	A199N-H	119.282	8.392		A199N-H	119.364	8.413		A199N-H	119.466	8.39		A199N-H	119.485	8.413		0.023933	0.0258375	0.0353369
	200	A200N-H	118.789	8.246		A200N-H	118.954	8.254		A200N-H	119.051	8.164		A200N-H	119.046	8.26		0.0244461	0.08983	0.0386078
	201	H201N-H	124.982	9.636		H201N-H	125.008	9.661		H201N-H	125.206	9.666		H201N-H	125.066	9.654		0.0252636	0.0433987	0.0215011
	202	K202N-H	118.057	8.434		K202N-H	118.138	8.429		K202N-H	118.178	8.424		K202N-H	118.177	8.434		0.0123934	0.0196714	0.0168
	203	D203N-H	117.034	7.585		D203N-H	117.091	7.587		D203N-H	117.034	7.557		D203N-H	117.148	7.586		0.00822681	0.028	0.0159913
	204	G204N-H	103.376	7.435		G204N-H	103.41	7.431		G204N-H	103.5	7.42		G204N-H	103.462	7.432		0.00621752	0.0229427	0.0124081
	205	R205N-H	119.081	7.695		R205N-H	119.071	7.693		R205N-H	119.123	7.671		R205N-H	119.152	7.697		0.00244131	0.0247098	0.0101392
	206	L206N-H	124.435	9.407		L206N-H	124.564	9.437		L206N-H	124.902	9.466		L206N-H	124.619	9.432		0.0350166	0.0880656	0.0358968
	207	Q207N-H	123.373	8.793		Q207N-H	123.499	8.802		Q207N-H	123.729	8.764		Q207N-H	123.611	8.805		0.0198033	0.057663	0.035415
	208	I208N-H	120.165	8.462		I208N-H	120.242	8.477		I208N-H	120.501	8.476		I208N-H	120.313	8.482		0.0184718	0.0490791	0.0287979
	209	G209N-H	116.45	9.084		G209N-H	116.603	9.092		G209N-H	116.649	9.069		G209N-H	116.648	9.097		0.0228652	0.0316414	0.030617
	210	D210N-H	122.006	7.903		D210N-H	122.074	7.896		D210N-H	121.97	7.886		D210N-H	122.157	7.9		0.0118165	0.0177314	0.0213518
	211	K211N-H	120.426	8.336		K211N-H	120.426	8.326		K211N-H	121.276	8.188		K211N-H	120.494	8.316		0.01	0.189908	0.0221502
	212	I212N-H	122.854	8.56		I212N-H	123.171	8.57		I212N-H	123.998	8.55		I212N-H	123.397	8.579		0.0454927	0.160472	0.0783584
	213	L213N-H	126.437	9.176		L213N-H	126.537	9.184		broad	broad	broad		L213N-H	126.605	9.191		0.0161245	99.99	0.0278961
	214	A214N-H	120.004	7.898		A214N-H	120.188	7.913		broad	broad	broad		A214N-H	120.347	7.927		0.029809	99.99	0.0560974
	215	V215N-H	118.904	8.483		V215N-H	118.993	8.481		V215N-H	119.315	8.621		V215N-H	118.981	8.481		0.0126195	0.149515	0.010964
	216	N216N-H	127.639	9.97		N216N-H	127.797	9.978		N216N-H	126.749	9.698		N216N-H	127.905	9.997		0.0235222	0.299181	0.045998
	217
	218	V218N-H	125.644	8.55		V218N-H	125.794	8.549		broad	broad	broad		V218N-H	125.797	8.554		0.0210238	99.99	0.0217903
	219	G219N-H	115.187	8.657		G219N-H	115.244	8.674		G219N-H	115.383	8.64		G219N-H	115.348	8.685		0.0187798	0.0322793	0.0359451
	220	L220N-H	121.831	8.035		L220N-H	121.825	8.024		broad	broad	broad		L220N-H	121.853	8.033		0.011032	99.99	0.00367238
	221	E221N-H	122.894	8.113		E221N-H	122.907	8.111		E221N-H	122.714	8.094		E221N-H	122.753	8.141		0.00270414	0.0315601	0.0342588
	222	D222N-H	125.162	8.765		D222N-H	125.312	8.792		D222N-H	125.7	8.791		D222N-H	124.897	8.768		0.0342053	0.0796813	0.0372211
	223	V223N-H	113.441	8.861		V223N-H	112.67	8.844		V223N-H	113.623	8.884		V223N-H	113.254	8.874		0.109271	0.0343254	0.02923
	224	M224N-H	118.278	8.687		M224N-H	118.293	8.725		M224N-H	118.258	8.668		M224N-H	118.33	8.692		0.038058	0.0192052	0.00883167
	225	H225N-H	124.61	9.882		H225N-H	125.195	9.914		H225N-H	125.046	9.876		H225N-H	124.758	9.896		0.0879296	0.0613342	0.0250064
	226	E226N-H	114.426	9.645		E226N-H	114.401	9.644		E226N-H	114.595	9.645		E226N-H	114.838	9.763		0.00364005	0.02366	0.131343
	227	D227N-H	119.773	7.292		D227N-H	119.967	7.333		D227N-H	120.211	7.284		D227N-H	120.001	7.347		0.0491799	0.0618397	0.0635916
	228	A228N-H	124.829	7.588		A228N-H	125.047	7.585		A228N-H	125.177	7.647		A228N-H	124.869	7.559		0.0306671	0.0765156	0.0295357
	229	V229N-H	116.85	7.873		V229N-H	117.002	7.941		V229N-H	117.036	7.908		V229N-H	116.92	7.902		0.0712519	0.0436243	0.0306111
	230	A230N-H	120.915	7.852		A230N-H	120.942	7.818		A230N-H	121.199	7.823		A230N-H	121.033	7.828		0.0342095	0.0492124	0.0291361
	231	A231N-H	119.844	7.78		A231N-H	119.858	7.789		A231N-H	120.22	7.918		A231N-H	119.797	7.788		0.00921095	0.147699	0.0103584
	232	L232N-H	114.997	7.475		L232N-H	115.114	7.516		L232N-H	115.352	7.564		L232N-H	115.129	7.503		0.0441509	0.101937	0.0335486
	233	K233N-H	121.79	8.071		K233N-H	121.372	8.08		K233N-H	121.483	7.983		K233N-H	121.67	8.098		0.059208	0.0979351	0.0318
	234	N234N-H	119.276	7.916		N234N-H	119.302	7.895		N234N-H	119.509	7.919		N234N-H	119.425	7.895		0.0213131	0.0327577	0.0295997
	235	T235N-H	109.739	7.526		T235N-H	109.658	7.522		T235N-H	109.973	7.577		T235N-H	109.691	7.531		0.0120248	0.0606153	0.00837606
	236	Y236N-H	121.971	8.635		Y236N-H	121.835	8.62						Y236N-H	121.914	8.629		0.0242388		0.00998401
	237	D237N-H	118.683	8.317		D237N-H	118.701	8.316		D237N-H	118.812	8.279		D237N-H	118.83	8.323		0.00271116	0.0420733	0.0214368
	238	V238N-H	119.041	7.752		V238N-H	119.028	7.737		V238N-H	119.148	7.606		V238N-H	119.1	7.745		0.01511	0.146766	0.0108272
	239	V239N-H	128.394	9.142		V239N-H	128.381	9.147		V239N-H	128.553	9.061		V239N-H	128.489	9.155		0.00532094	0.084003	0.0185981
	240	Y240N-H	125.142	8.851		Y240N-H	125.295	8.886		broad	broad	broad		Y240N-H	125.329	8.885		0.0410343	99.99	0.0429114
	241	L241N-H	125.323	9.311		L241N-H	125.432	9.306		L241N-H	126.507	9.439		L241N-H	125.542	9.336		0.0160583	0.209429	0.0395605
	242	K242N-H	125.009	8.258		K242N-H	125.052	8.259		broad	broad	broad		K242N-H	125.013	8.262		0.00610249	99.99	0.00403901
	243	V243N-H	124.833	9.187		V243N-H	124.55	9.183		broad	broad	broad		V243N-H	124.508	9.181		0.0398214	99.99	0.0458939
	244	A244N-H	125.062	9.058		A244N-H	125.157	9.031		A244N-H	125.703	8.821		A244N-H	125.168	9.043		0.030098	0.253421	0.0211004
	245	K245N-H	124.921	8.833		K245N-H	124.83	8.8		K245N-H	124.461	8.737		K245N-H	125.086	8.811		0.0353738	0.1156	0.0319
	246
	247	S247N-H	116.345	8.522		S247N-H	116.282	8.531		S247N-H	116.59	8.5		S247N-H	116.356	8.536		0.0126013	0.0407491	0.0140844
	248
	249	A249N-H	129.223	7.871		A249N-H	129.247	7.865		A249N-H	129.373	7.852		A249N-H	129.345	7.875		0.00687674	0.0283196	0.0175421

## Sheet: Fig5a
Figure 5a	Kinetic parameters measured by SPR for each independent experiments
			kon (1/Ms)	koff (1/s)	KD (M)
		Xph15	64770	0.2355	3.636e-06
			98350	0.6932	7.049e-06
			121500	0.2705	2.226e-06
		Xph18	12060	0.02465	2.044e-06
			7610	0.02339	3.074e-06
			9818	0.02551	2.598e-06
		Xph20	204100	0.05929	2.905e-07
			186200	0.07527	4.042e-07
			234200	0.06908	2.95e-07

## Sheet: Fig5b
Figure 5b	Affinities measured by ITC (n=1)
		PSD95-12 dilution ITC Raw Data (for Xph15 and 20)			Xph15 ITC Raw Data			Xph20 ITC Raw Data				PSD95-12 dilution ITC Raw Data (for Xph18)			Xph18 ITC Raw Data
		time (s)	cp		time (s)	cp		time (s)	cp			Time (s)	cp		time (s)	cp
		5	9.64834		5	9.76394		5	9.78265			5	9.80064		5	9.75712
		6	9.64854		6	9.76475		6	9.78001			6	9.80015		6	9.75812
		7	9.64875		7	9.76446		7	9.77709			7	9.79985		7	9.75921
		8	9.64888		8	9.76461		8	9.77388			8	9.80027		8	9.76151
		9	9.64873		9	9.76493		9	9.77077			9	9.80062		9	9.76264
		10	9.64839		10	9.76528		10	9.76853			10	9.80049		10	9.76346
		11	9.64872		11	9.76537		11	9.76791			11	9.8012		11	9.76363
		12	9.64856		12	9.7655		12	9.76616			12	9.80257		12	9.76159
		13	9.64837		13	9.76487		13	9.76447			13	9.80289		13	9.75882
		14	9.64807		14	9.76378		14	9.76307			14	9.80254		14	9.75733
		15	9.64832		15	9.76252		15	9.76263			15	9.80309		15	9.75674
		16	9.64892		16	9.76195		16	9.76134			16	9.80348		16	9.75584
		17	9.64952		17	9.76234		17	9.76312			17	9.80251		17	9.7576
		18	9.64963		18	9.76351		18	9.76493			18	9.80271		18	9.75959
		19	9.65012		19	9.76363		19	9.76627			19	9.80405		19	9.76136
		20	9.64929		20	9.76394		20	9.7673			20	9.80451		20	9.76212
		21	9.64832		21	9.76401		21	9.76727			21	9.80459		21	9.76235
		22	9.64769		22	9.76404		22	9.76611			22	9.80486		22	9.7622
		23	9.64716		23	9.76324		23	9.76468			23	9.80445		23	9.76177
		24	9.64728		24	9.76327		24	9.76278			24	9.80331		24	9.76143
		25	9.64766		25	9.76213		25	9.76022			25	9.80226		25	9.76159
		26	9.64805		26	9.76286		26	9.75806			26	9.80162		26	9.76219
		27	9.6483		27	9.76296		27	9.75518			27	9.8022		27	9.76197
		28	9.6487		28	9.76401		28	9.75347			28	9.80251		28	9.76235
		29	9.64847		29	9.76515		29	9.75416			29	9.80269		29	9.76298
		30	9.64812		30	9.76616		30	9.75457			30	9.80261		30	9.76293
		31	9.64777		31	9.7655		31	9.75544			31	9.80322		31	9.76451
		32	9.64775		32	9.76472		32	9.75746			32	9.80272		32	9.76604
		33	9.64662		33	9.76469		33	9.75952			33	9.80307		33	9.76739
		34	9.64683		34	9.76452		34	9.76026			34	9.80357		34	9.76922
		35	9.6481		35	9.76545		35	9.76071			35	9.80419		35	9.77117
		36	9.64793		36	9.76594		36	9.76132			36	9.80509		36	9.77255
		37	9.64767		37	9.76677		37	9.76249			37	9.80548		37	9.77333
		38	9.64842		38	9.76638		38	9.76211			38	9.80535		38	9.77443
		39	9.64858		39	9.76603		39	9.76121			39	9.80431		39	9.77396
		40	9.64775		40	9.76527		40	9.76176			40	9.80275		40	9.77354
		41	9.6481		41	9.76497		41	9.76175			41	9.80204		41	9.77325
		42	9.64845		42	9.76532		42	9.7609			42	9.80219		42	9.77307
		43	9.64854		43	9.76526		43	9.75963			43	9.80192		43	9.77326
		44	9.64761		44	9.76604		44	9.75857			44	9.80332		44	9.7747
		45	9.64728		45	9.76649		45	9.75701			45	9.80461		45	9.77554
		46	9.64676		46	9.76708		46	9.75549			46	9.80438		46	9.77495
		47	9.64682		47	9.76672		47	9.75551			47	9.80463		47	9.7752
		48	9.64689		48	9.7665		48	9.75711			48	9.80456		48	9.77378
		49	9.64787		49	9.76439		49	9.75829			49	9.80343		49	9.77154
		50	9.64822		50	9.76419		50	9.75864			50	9.80372		50	9.76974
		51	9.64952		51	9.76412		51	9.75877			51	9.80497		51	9.76902
		52	9.65064		52	9.76549		52	9.7577			52	9.80509		52	9.76843
		53	9.65172		53	9.76699		53	9.7574			53	9.80531		53	9.76874
		54	9.65254		54	9.76937		54	9.75793			54	9.80538		54	9.76938
		55	9.65283		55	9.76996		55	9.75845			55	9.80463		55	9.7705
		56	9.6518		56	9.77017		56	9.76039			56	9.80304		56	9.77183
		57	9.65089		57	9.77033		57	9.76169			57	9.80213		57	9.77235
		58	9.65071		58	9.77053		58	9.76209			58	9.80213		58	9.77164
		59	9.65041		59	9.77048		59	9.76108			59	9.80245		59	9.77084
		60	9.65102		60	9.77002		60	9.76099			60	9.80327		60	9.76942
		61	9.6518		61	9.76974		61	9.76014			61	9.80466		61	9.76663
		62	9.65788		62	9.76598		62	9.75479			62	9.80854		62	9.76505
		63	9.67417		63	9.75471		63	9.73056			63	9.82571		63	9.75964
		64	9.68903		64	9.73006		64	9.70095			64	9.84173		64	9.73408
		65	9.70077		65	9.69983		65	9.67161			65	9.85344		65	9.68973
		66	9.70942		66	9.67147		66	9.64863			66	9.86003		66	9.63916
		67	9.70913		67	9.65231		67	9.63583			67	9.8613		67	9.58889
		68	9.69624		68	9.64645		68	9.64628			68	9.84783		68	9.54755
		69	9.68307		69	9.65943		69	9.66734			69	9.83512		69	9.53342
		70	9.67312		70	9.68092		70	9.68983			70	9.82524		70	9.54463
		71	9.66608		71	9.70195		71	9.7079			71	9.81846		71	9.56848
		72	9.66243		72	9.71761		72	9.72226			72	9.81378		72	9.59501
		73	9.66012		73	9.72864		73	9.7341			73	9.81024		73	9.6216
		74	9.65886		74	9.73495		74	9.74038			74	9.80817		74	9.64551
		75	9.65762		75	9.7396		75	9.7447			75	9.8077		75	9.66565
		76	9.65643		76	9.74293		76	9.74675			76	9.80808		76	9.6815
		77	9.6553		77	9.74679		77	9.74762			77	9.80928		77	9.69472
		78	9.6546		78	9.74955		78	9.74646			78	9.81029		78	9.70594
		79	9.6547		79	9.75215		79	9.74833			79	9.80966		79	9.71304
		80	9.65523		80	9.75478		80	9.74998			80	9.80873		80	9.71893
		81	9.65594		81	9.75734		81	9.75325			81	9.80872		81	9.72414
		82	9.65607		82	9.7588		82	9.75445			82	9.80801		82	9.72874
		83	9.65567		83	9.7609		83	9.75565			83	9.80687		83	9.73258
		84	9.6547		84	9.76177		84	9.75499			84	9.80792		84	9.73669
		85	9.65408		85	9.76194		85	9.75545			85	9.80912		85	9.73909
		86	9.65353		86	9.76149		86	9.75428			86	9.8097		86	9.7422
		87	9.65363		87	9.76137		87	9.75468			87	9.80988		87	9.74558
		88	9.65309		88	9.76135		88	9.75524			88	9.80914		88	9.74873
		89	9.65404		89	9.7638		89	9.75804			89	9.80784		89	9.75143
		90	9.65535		90	9.76638		90	9.75865			90	9.80762		90	9.75531
		91	9.65646		91	9.76841		91	9.75883			91	9.80566		91	9.75699
		92	9.65633		92	9.76902		92	9.75854			92	9.80502		92	9.75859
		93	9.65771		93	9.77063		93	9.75803			93	9.80699		93	9.75934
		94	9.65884		94	9.77098		94	9.75582			94	9.80869		94	9.75936
		95	9.6569		95	9.77075		95	9.75482			95	9.80811		95	9.75963
		96	9.65484		96	9.7706		96	9.75509			96	9.80893		96	9.76098
		97	9.65442		97	9.77085		97	9.7565			97	9.80872		97	9.76235
		98	9.65378		98	9.77049		98	9.75719			98	9.80833		98	9.76245
		99	9.6514		99	9.77023		99	9.75836			99	9.80644		99	9.76392
		100	9.65203		100	9.77013		100	9.7595			100	9.80616		100	9.76438
		101	9.654		101	9.77074		101	9.76004			101	9.80631		101	9.76485
		102	9.65501		102	9.77221		102	9.76072			102	9.80674		102	9.76463
		103	9.65609		103	9.77325		103	9.76227			103	9.80702		103	9.76633
		104	9.65769		104	9.7729		104	9.76337			104	9.80733		104	9.76696
		105	9.65764		105	9.7728		105	9.76407			105	9.80656		105	9.76813
		106	9.6574		106	9.77253		106	9.76354			106	9.80622		106	9.76825
		107	9.65754		107	9.77215		107	9.76178			107	9.80655		107	9.76875
		108	9.65698		108	9.77127		108	9.75961			108	9.80639		108	9.7684
		109	9.65679		109	9.77077		109	9.75722			109	9.80823		109	9.76825
		110	9.65651		110	9.77022		110	9.7565			110	9.80914		110	9.768
		111	9.657		111	9.77077		111	9.75712			111	9.80962		111	9.76901
		112	9.65581		112	9.77087		112	9.75743			112	9.80879		112	9.77022
		113	9.65534		113	9.77006		113	9.75912			113	9.80885		113	9.77091
		114	9.65514		114	9.76968		114	9.7608			114	9.807		114	9.77088
		115	9.65636		115	9.77123		115	9.76036			115	9.80635		115	9.77182
		116	9.65649		116	9.77221		116	9.75984			116	9.80606		116	9.77278
		117	9.65766		117	9.77146		117	9.75907			117	9.80651		117	9.77357
		118	9.65778		118	9.77181		118	9.75942			118	9.80674		118	9.77387
		119	9.65727		119	9.77281		119	9.76127			119	9.80733		119	9.77497
		120	9.65684		120	9.77363		120	9.76245			120	9.80822		120	9.77401
		121	9.65569		121	9.77361		121	9.76333			121	9.8081		121	9.7726
		122	9.6552		122	9.77363		122	9.76342			122	9.80768		122	9.772
		123	9.65593		123	9.77424		123	9.76144			123	9.8061		123	9.77159
		124	9.6558		124	9.77494		124	9.75851			124	9.80556		124	9.77215
		125	9.65593		125	9.7731		125	9.75716			125	9.80282		125	9.77391
		126	9.65674		126	9.7725		126	9.75711			126	9.80146		126	9.77426
		127	9.65803		127	9.7739		127	9.75923			127	9.80144		127	9.77338
		128	9.65827		128	9.77462		128	9.76243			128	9.80389		128	9.77351
		129	9.65987		129	9.77429		129	9.76307			129	9.80495		129	9.7742
		130	9.65967		130	9.77539		130	9.76211			130	9.80875		130	9.77398
		131	9.65844		131	9.77699		131	9.76127			131	9.81063		131	9.77467
		132	9.65709		132	9.77744		132	9.75937			132	9.81165		132	9.77568
		133	9.65645		133	9.77704		133	9.75726			133	9.81087		133	9.77623
		134	9.65583		134	9.7776		134	9.75833			134	9.81106		134	9.77586
		135	9.656		135	9.77882		135	9.76093			135	9.81072		135	9.77551
		136	9.65609		136	9.77741		136	9.76135			136	9.811		136	9.77546
		137	9.65626		137	9.77442		137	9.76203			137	9.81161		137	9.77545
		138	9.65662		138	9.77442		138	9.76139			138	9.81122		138	9.77566
		139	9.65675		139	9.77433		139	9.76094			139	9.81069		139	9.77502
		140	9.65663		140	9.77213		140	9.75988			140	9.81016		140	9.77546
		141	9.65719		141	9.7727		141	9.75995			141	9.80961		141	9.77639
		142	9.658		142	9.7759		142	9.76028			142	9.80954		142	9.77663
		143	9.65881		143	9.77581		143	9.76093			143	9.80944		143	9.77726
		144	9.65886		144	9.77618		144	9.76119			144	9.8085		144	9.77802
		145	9.65936		145	9.77684		145	9.76151			145	9.8084		145	9.7777
		146	9.65981		146	9.7766		146	9.76096			146	9.80876		146	9.77673
		147	9.65962		147	9.77508		147	9.76049			147	9.80802		147	9.77608
		148	9.65872		148	9.77474		148	9.7614			148	9.8084		148	9.7754
		149	9.65947		149	9.77474		149	9.76073			149	9.80887		149	9.77565
		150	9.66021		150	9.7757		150	9.75988			150	9.80808		150	9.77611
		151	9.65949		151	9.77611		151	9.762			151	9.80772		151	9.77662
		152	9.65896		152	9.77592		152	9.76373			152	9.80785		152	9.77706
		153	9.65928		153	9.7766		153	9.76305			153	9.8075		153	9.77708
		154	9.65914		154	9.77624		154	9.7645			154	9.80774		154	9.77684
		155	9.65875		155	9.77483		155	9.76589			155	9.80832		155	9.77729
		156	9.65993		156	9.77481		156	9.76581			156	9.80853		156	9.77708
		157	9.66076		157	9.77656		157	9.76529			157	9.80867		157	9.77703
		158	9.66077		158	9.77584		158	9.76643			158	9.80878		158	9.77676
		159	9.66139		159	9.77607		159	9.76513			159	9.81007		159	9.77693
		160	9.6619		160	9.77798		160	9.76473			160	9.81083		160	9.77713
		161	9.66108		161	9.7776		161	9.76245			161	9.81002		161	9.7778
		162	9.66072		162	9.77632		162	9.76092			162	9.80921		162	9.77826
		163	9.66078		163	9.7767		163	9.75831			163	9.80943		163	9.77859
		164	9.6595		164	9.77647		164	9.7561			164	9.80868		164	9.7788
		165	9.65842		165	9.77448		165	9.754			165	9.80832		165	9.77859
		166	9.65865		166	9.7748		166	9.75447			166	9.80919		166	9.77846
		167	9.65859		167	9.77615		167	9.75509			167	9.81019		167	9.77889
		168	9.65789		168	9.77722		168	9.75516			168	9.81053		168	9.78007
		169	9.65813		169	9.77703		169	9.75681			169	9.80947		169	9.77967
		170	9.65827		170	9.77881		170	9.75808			170	9.8076		170	9.77888
		171	9.65896		171	9.77867		171	9.7579			171	9.80694		171	9.77856
		172	9.65989		172	9.7775		172	9.75608			172	9.80738		172	9.77834
		173	9.66063		173	9.77607		173	9.75518			173	9.80829		173	9.77709
		174	9.66176		174	9.77521		174	9.7529			174	9.80943		174	9.77757
		175	9.66171		175	9.7752		175	9.75241			175	9.81179		175	9.77851
		176	9.66186		176	9.77725		176	9.75277			176	9.81254		176	9.77863
		177	9.6609		177	9.77852		177	9.75517			177	9.81175		177	9.7784
		178	9.66111		178	9.77928		178	9.75669			178	9.81074		178	9.77917
		179	9.65975		179	9.78166		179	9.75896			179	9.81008		179	9.77943
		180	9.65918		180	9.7839		180	9.76025			180	9.81016		180	9.77986
		181	9.66012		181	9.78488		181	9.75977			181	9.81097		181	9.78061
		182	9.66221		182	9.78561		182	9.75911			182	9.81087		182	9.78097
		183	9.66228		183	9.78696		183	9.75979			183	9.81039		183	9.78113
		184	9.6636		184	9.7857		184	9.76146			184	9.81145		184	9.78146
		185	9.66502		185	9.78258		185	9.76046			185	9.81138		185	9.78192
		186	9.66417		186	9.77915		186	9.76138			186	9.8118		186	9.78216
		187	9.66317		187	9.7784		187	9.76202			187	9.81009		187	9.78177
		188	9.66347		188	9.77868		188	9.76273			188	9.80609		188	9.78186
		189	9.66297		189	9.77914		189	9.76116			189	9.80434		189	9.78208
		190	9.66363		190	9.77952		190	9.7613			190	9.80407		190	9.78198
		191	9.66451		191	9.78115		191	9.76082			191	9.80423		191	9.782
		192	9.6647		192	9.78183		192	9.7615			192	9.80753		192	9.78228
		193	9.66485		193	9.78046		193	9.76102			193	9.81224		193	9.78247
		194	9.66507		194	9.78071		194	9.76191			194	9.81287		194	9.78231
		195	9.66456		195	9.78074		195	9.76324			195	9.81254		195	9.78228
		196	9.66416		196	9.77975		196	9.76358			196	9.81111		196	9.78178
		197	9.66402		197	9.77725		197	9.76168			197	9.80973		197	9.7831
		198	9.66404		198	9.7776		198	9.76015			198	9.80994		198	9.78382
		199	9.66456		199	9.77816		199	9.75866			199	9.81107		199	9.78398
		200	9.66526		200	9.77871		200	9.75767			200	9.81197		200	9.78302
		201	9.66498		201	9.77976		201	9.75748			201	9.81366		201	9.78347
		202	9.66477		202	9.78135		202	9.75725			202	9.81402		202	9.78292
		203	9.66486		203	9.78106		203	9.75787			203	9.81336		203	9.78326
		204	9.66433		204	9.77992		204	9.75794			204	9.81195		204	9.78322
		205	9.66345		205	9.78129		205	9.75665			205	9.81161		205	9.78499
		206	9.6634		206	9.78088		206	9.75455			206	9.81017		206	9.7848
		207	9.6641		207	9.78013		207	9.7554			207	9.81004		207	9.78481
		208	9.66445		208	9.77969		208	9.75683			208	9.81071		208	9.78388
		209	9.66421		209	9.7796		209	9.76006			209	9.81221		209	9.7828
		210	9.66505		210	9.77738		210	9.7629			210	9.81273		210	9.78169
		211	9.66507		211	9.77762		211	9.7649			211	9.81427		211	9.78223
		212	9.66487		212	9.7799		212	9.76405			212	9.81508		212	9.78216
		213	9.66554		213	9.78027		213	9.76253			213	9.81395		213	9.78315
		214	9.66665		214	9.78046		214	9.75908			214	9.81301		214	9.78408
		215	9.66562		215	9.78175		215	9.75759			215	9.813		215	9.78407
		216	9.66538		216	9.78193		216	9.75802			216	9.81351		216	9.7837
		217	9.66481		217	9.78094		217	9.75962			217	9.81319		217	9.78385
		218	9.6638		218	9.78107		218	9.76141			218	9.8147		218	9.78354
		219	9.66345		219	9.78137		219	9.76277			219	9.81631		219	9.78368
		220	9.66425		220	9.78085		220	9.76344			220	9.81573		220	9.78421
		221	9.66548		221	9.78062		221	9.76341			221	9.81461		221	9.78427
		222	9.66662		222	9.78076		222	9.76271			222	9.81507		222	9.78459
		223	9.66789		223	9.78149		223	9.76151			223	9.81522		223	9.7846
		224	9.66977		224	9.78244		224	9.7617			224	9.81462		224	9.78549
		225	9.67077		225	9.78316		225	9.76267			225	9.81482		225	9.78529
		226	9.67089		226	9.78378		226	9.76258			226	9.81379		226	9.7851
		227	9.67104		227	9.7837		227	9.76253			227	9.81253		227	9.78532
		228	9.67063		228	9.7845		228	9.763			228	9.81147		228	9.78545
		229	9.66897		229	9.7853		229	9.76241			229	9.81102		229	9.78548
		230	9.66937		230	9.78542		230	9.76078			230	9.8108		230	9.78594
		231	9.66905		231	9.78536		231	9.76145			231	9.81001		231	9.78585
		232	9.66914		232	9.78516		232	9.76181			232	9.81046		232	9.7853
		233	9.67002		233	9.78416		233	9.76135			233	9.8117		233	9.78525
		234	9.67062		234	9.78272		234	9.7619			234	9.81262		234	9.78509
		235	9.66912		235	9.78328		235	9.76077			235	9.81438		235	9.78463
		236	9.6695		236	9.78309		236	9.7593			236	9.81645		236	9.78488
		237	9.67003		237	9.78358		237	9.75881			237	9.81691		237	9.78477
		238	9.67021		238	9.78323		238	9.75962			238	9.8166		238	9.78497
		239	9.67053		239	9.78227		239	9.75989			239	9.81644		239	9.78485
		240	9.67165		240	9.78134		240	9.76083			240	9.8154		240	9.78496
		241	9.67177		241	9.7815		241	9.7626			241	9.8162		241	9.78591
		242	9.68108		242	9.77714		242	9.75507			242	9.8229		242	9.7872
		243	9.71576		243	9.75802		243	9.70204			243	9.84915		243	9.78611
		244	9.76386		244	9.71123		244	9.60205			244	9.8956		244	9.76263
		245	9.80473		245	9.63782		245	9.48463			245	9.95018		245	9.70055
		246	9.83558		246	9.56013		246	9.37624			246	9.99315		246	9.59518
		247	9.84712		247	9.49641		247	9.30049			247	10.0194		247	9.4639
		248	9.82683		248	9.46482		248	9.29335			248	10.017		248	9.32844
		249	9.78857		249	9.47325		249	9.35366			249	9.98771		249	9.22176
		250	9.75403		250	9.51568		250	9.44377			250	9.94597		250	9.16558
		251	9.72697		251	9.56733		251	9.53111			251	9.9121		251	9.16598
		252	9.70802		252	9.61421		252	9.59769			252	9.8867		252	9.20466
		253	9.69497		253	9.64872		253	9.64335			253	9.86816		253	9.26005
		254	9.68743		254	9.67504		254	9.67071			254	9.85554		254	9.31742
		255	9.68282		255	9.69333		255	9.68732			255	9.8474		255	9.37098
		256	9.68135		256	9.70738		256	9.69785			256	9.84252		256	9.41855
		257	9.68071		257	9.71692		257	9.70577			257	9.83994		257	9.45798
		258	9.68039		258	9.7235		258	9.71145			258	9.83745		258	9.49152
		259	9.67921		259	9.72625		259	9.71574			259	9.83598		259	9.52239
		260	9.67743		260	9.73135		260	9.72135			260	9.83485		260	9.55018
		261	9.67644		261	9.73656		261	9.72502			261	9.83384		261	9.5734
		262	9.6751		262	9.74242		262	9.72913			262	9.83212		262	9.59549
		263	9.67404		263	9.74741		263	9.73249			263	9.83064		263	9.61602
		264	9.67348		264	9.75407		264	9.73594			264	9.8283		264	9.63368
		265	9.6733		265	9.75904		265	9.7379			265	9.82618		265	9.64886
		266	9.67212		266	9.76325		266	9.74007			266	9.82282		266	9.66324
		267	9.67252		267	9.76656		267	9.74179			267	9.82097		267	9.676
		268	9.67194		268	9.76937		268	9.74422			268	9.81954		268	9.68702
		269	9.67157		269	9.77058		269	9.74602			269	9.8178		269	9.69755
		270	9.67196		270	9.77061		270	9.74733			270	9.81655		270	9.70743
		271	9.67219		271	9.77055		271	9.74998			271	9.81698		271	9.71587
		272	9.67127		272	9.77199		272	9.75151			272	9.8175		272	9.72332
		273	9.67202		273	9.77388		273	9.75253			273	9.81726		273	9.73057
		274	9.67246		274	9.77498		274	9.75467			274	9.81611		274	9.73715
		275	9.67339		275	9.77743		275	9.75547			275	9.81468		275	9.74162
		276	9.67367		276	9.77916		276	9.75462			276	9.81516		276	9.74479
		277	9.67389		277	9.77871		277	9.75531			277	9.81502		277	9.74853
		278	9.67332		278	9.77896		278	9.75572			278	9.81653		278	9.75209
		279	9.67257		279	9.78021		279	9.75554			279	9.81868		279	9.75381
		280	9.67123		280	9.78173		280	9.75681			280	9.81938		280	9.75543
		281	9.6708		281	9.78324		281	9.75807			281	9.81669		281	9.75644
		282	9.67088		282	9.78566		282	9.75931			282	9.81484		282	9.75727
		283	9.67027		283	9.78643		283	9.7599			283	9.81368		283	9.75816
		284	9.6696		284	9.7865		284	9.75921			284	9.81452		284	9.75998
		285	9.66941		285	9.78552		285	9.75909			285	9.81585		285	9.76254
		286	9.66951		286	9.78493		286	9.75988			286	9.81776		286	9.76614
		287	9.66915		287	9.78246		287	9.75976			287	9.81889		287	9.76808
		288	9.66937		288	9.78198		288	9.76045			288	9.81982		288	9.76983
		289	9.66994		289	9.78303		289	9.76214			289	9.82023		289	9.77044
		290	9.66982		290	9.78343		290	9.76351			290	9.82037		290	9.77091
		291	9.66851		291	9.78475		291	9.76398			291	9.82123		291	9.77149
		292	9.66864		292	9.78715		292	9.76418			292	9.82139		292	9.77217
		293	9.66848		293	9.78775		293	9.76331			293	9.82065		293	9.77201
		294	9.66873		294	9.78766		294	9.76155			294	9.81934		294	9.77273
		295	9.66903		295	9.7882		295	9.75996			295	9.81884		295	9.77496
		296	9.66989		296	9.7871		296	9.75874			296	9.81766		296	9.77736
		297	9.66958		297	9.78579		297	9.75772			297	9.81727		297	9.77993
		298	9.66982		298	9.78613		298	9.75866			298	9.81703		298	9.78167
		299	9.66986		299	9.78652		299	9.76108			299	9.81716		299	9.78319
		300	9.67053		300	9.78491		300	9.76243			300	9.81687		300	9.78294
		301	9.67136		301	9.78478		301	9.76294			301	9.81604		301	9.78276
		302	9.6719		302	9.78591		302	9.76467			302	9.81534		302	9.78418
		303	9.67166		303	9.78572		303	9.76505			303	9.81543		303	9.78542
		304	9.67123		304	9.78616		304	9.76366			304	9.81585		304	9.78625
		305	9.67129		305	9.79905		305	9.76363			305	9.81599		305	9.7879
		306	9.67166		306	9.80481		306	9.76415			306	9.8164		306	9.7888
		307	9.67187		307	9.80641		307	9.76406			307	9.81736		307	9.78851
		308	9.67259		308	9.8035		308	9.76316			308	9.81736		308	9.78845
		309	9.67298		309	9.80306		309	9.76299			309	9.81738		309	9.78843
		310	9.67278		310	9.79038		310	9.76162			310	9.81732		310	9.7885
		311	9.67132		311	9.78274		311	9.76075			311	9.81672		311	9.78937
		312	9.67127		312	9.7801		312	9.75977			312	9.8154		312	9.7902
		313	9.67105		313	9.78162		313	9.76094			313	9.81544		313	9.79222
		314	9.67091		314	9.78093		314	9.7618			314	9.81537		314	9.79461
		315	9.67094		315	9.78233		315	9.76243			315	9.8157		315	9.79606
		316	9.67179		316	9.78491		316	9.76378			316	9.81653		316	9.79564
		317	9.67222		317	9.7865		317	9.76457			317	9.8187		317	9.79467
		318	9.67321		318	9.78829		318	9.76324			318	9.81821		318	9.79344
		319	9.67382		319	9.78871		319	9.76279			319	9.81758		319	9.79272
		320	9.6739		320	9.78883		320	9.7626			320	9.81725		320	9.79161
		321	9.67481		321	9.78892		321	9.76129			321	9.81772		321	9.79393
		322	9.67456		322	9.7882		322	9.76086			322	9.81649		322	9.80077
		323	9.67418		323	9.78792		323	9.76206			323	9.81741		323	9.8089
		324	9.67429		324	9.7882		324	9.76256			324	9.81807		324	9.81693
		325	9.67454		325	9.78644		325	9.76321			325	9.81847		325	9.82463
		326	9.67291		326	9.78669		326	9.7646			326	9.81811		326	9.82995
		327	9.67227		327	9.78628		327	9.76568			327	9.81845		327	9.82986
		328	9.67228		328	9.78561		328	9.76551			328	9.81811		328	9.82677
		329	9.67196		329	9.78575		329	9.76537			329	9.81854		329	9.82234
		330	9.67087		330	9.78749		330	9.76518			330	9.81891		330	9.81881
		331	9.67157		331	9.78718		331	9.76375			331	9.8203		331	9.81374
		332	9.67136		332	9.78855		332	9.76172			332	9.82077		332	9.81081
		333	9.67008		333	9.78953		333	9.76051			333	9.82149		333	9.80944
		334	9.66955		334	9.7895		334	9.76038			334	9.8215		334	9.80804
		335	9.67073		335	9.78927		335	9.75999			335	9.82076		335	9.80572
		336	9.67071		336	9.78896		336	9.76065			336	9.81965		336	9.80558
		337	9.67083		337	9.78783		337	9.76191			337	9.81923		337	9.80505
		338	9.67193		338	9.78838		338	9.76817			338	9.81889		338	9.80364
		339	9.67231		339	9.78857		339	9.78197			339	9.81874		339	9.80318
		340	9.67136		340	9.78821		340	9.80608			340	9.82024		340	9.80381
		341	9.67251		341	9.7885		341	9.83195			341	9.82019		341	9.80295
		342	9.67331		342	9.78886		342	9.85545			342	9.81974		342	9.80093
		343	9.67297		343	9.78785		343	9.87011			343	9.81938		343	9.80094
		344	9.67329		344	9.78718		344	9.87369			344	9.81897		344	9.80025
		345	9.67392		345	9.78851		345	9.86387			345	9.81854		345	9.79957
		346	9.67348		346	9.78827		346	9.85033			346	9.81862		346	9.7996
		347	9.67462		347	9.7876		347	9.83688			347	9.82003		347	9.80063
		348	9.6755		348	9.78857		348	9.82398			348	9.82162		348	9.80003
		349	9.67476		349	9.78946		349	9.81338			349	9.82213		349	9.80002
		350	9.67338		350	9.78872		350	9.80628			350	9.82136		350	9.8
		351	9.67197		351	9.78957		351	9.79923			351	9.82095		351	9.80049
		352	9.67065		352	9.78999		352	9.79409			352	9.81992		352	9.79977
		353	9.67024		353	9.7897		353	9.79084			353	9.819		353	9.79892
		354	9.6706		354	9.78958		354	9.78912			354	9.82008		354	9.79862
		355	9.67309		355	9.78843		355	9.78702			355	9.8209		355	9.79797
		356	9.67421		356	9.78762		356	9.78498			356	9.82207		356	9.79675
		357	9.67419		357	9.78756		357	9.78225			357	9.82281		357	9.79625
		358	9.67451		358	9.78725		358	9.78138			358	9.82359		358	9.79627
		359	9.67624		359	9.7879		359	9.78006			359	9.82302		359	9.79612
		360	9.67626		360	9.78987		360	9.7793			360	9.82248		360	9.79584
		361	9.6773		361	9.79046		361	9.77861			361	9.82191		361	9.79613
		362	9.67738		362	9.79092		362	9.77913			362	9.82254		362	9.79712
		363	9.67697		363	9.79092		363	9.77949			363	9.82151		363	9.79793
		364	9.67567		364	9.79033		364	9.77804			364	9.82174		364	9.79842
		365	9.67453		365	9.78945		365	9.77653			365	9.82205		365	9.7992
		366	9.67325		366	9.78849		366	9.77555			366	9.82247		366	9.79948
		367	9.67351		367	9.78849		367	9.77569			367	9.82214		367	9.79935
		368	9.67375		368	9.78883		368	9.77405			368	9.82194		368	9.7998
		369	9.67403		369	9.78816		369	9.7734			369	9.8214		369	9.80027
		370	9.67477		370	9.78854		370	9.77168			370	9.82087		370	9.80106
		371	9.67548		371	9.78959		371	9.77221			371	9.82126		371	9.80252
		372	9.676		372	9.79037		372	9.77235			372	9.82147		372	9.80284
		373	9.67616		373	9.79079		373	9.77327			373	9.8225		373	9.80273
		374	9.67635		374	9.79129		374	9.7748			374	9.82192		374	9.80224
		375	9.6763		375	9.79042		375	9.77655			375	9.82196		375	9.80128
		376	9.67607		376	9.7906		376	9.77724			376	9.82133		376	9.80059
		377	9.67711		377	9.79009		377	9.77656			377	9.8195		377	9.80018
		378	9.67814		378	9.78975		378	9.77565			378	9.81971		378	9.80045
		379	9.6785		379	9.78933		379	9.77361			379	9.82116		379	9.80029
		380	9.67853		380	9.78938		380	9.77297			380	9.82274		380	9.8002
		381	9.67827		381	9.78777		381	9.77201			381	9.82321		381	9.80002
		382	9.67655		382	9.7887		382	9.77154			382	9.82425		382	9.8004
		383	9.67552		383	9.78964		383	9.77123			383	9.82328		383	9.80041
		384	9.6765		384	9.78929		384	9.77072			384	9.8224		384	9.80076
		385	9.67701		385	9.78997		385	9.76905			385	9.82089		385	9.80211
		386	9.67834		386	9.79053		386	9.7691			386	9.81922		386	9.80233
		387	9.67963		387	9.78988		387	9.76871			387	9.81932		387	9.80335
		388	9.68092		388	9.7887		388	9.76856			388	9.81996		388	9.80378
		389	9.68016		389	9.78899		389	9.76682			389	9.82078		389	9.80364
		390	9.68033		390	9.79129		390	9.75891			390	9.82261		390	9.80235
		391	9.68083		391	9.79281		391	9.7466			391	9.82572		391	9.8021
		392	9.68061		392	9.79198		392	9.73397			392	9.82636		392	9.80102
		393	9.68025		393	9.79098		393	9.72358			393	9.82631		393	9.79939
		394	9.68062		394	9.79099		394	9.71667			394	9.82558		394	9.79964
		395	9.68053		395	9.78796		395	9.71707			395	9.82442		395	9.80022
		396	9.68067		396	9.78792		396	9.7224			396	9.82252		396	9.80049
		397	9.68199		397	9.78984		397	9.72884			397	9.82312		397	9.80109
		398	9.68272		398	9.79062		398	9.73463			398	9.82439		398	9.80086
		399	9.68239		399	9.79134		399	9.74002			399	9.82534		399	9.80011
		400	9.68315		400	9.79156		400	9.74509			400	9.82538		400	9.80003
		401	9.68219		401	9.79142		401	9.74818			401	9.8253		401	9.80003
		402	9.68145		402	9.78949		402	9.75081			402	9.82451		402	9.79967
		403	9.68131		403	9.79106		403	9.7541			403	9.82312		403	9.80055
		404	9.68162		404	9.79189		404	9.75666			404	9.82243		404	9.80133
		405	9.68118		405	9.79258		405	9.75817			405	9.82284		405	9.80108
		406	9.68148		406	9.79346		406	9.76075			406	9.82522		406	9.80104
		407	9.68012		407	9.79423		407	9.76319			407	9.82713		407	9.80167
		408	9.67925		408	9.79265		408	9.76372			408	9.82791		408	9.80174
		409	9.67907		409	9.79189		409	9.76392			409	9.8285		409	9.80225
		410	9.67892		410	9.79124		410	9.76387			410	9.82779		410	9.8034
		411	9.67908		411	9.79018		411	9.76275			411	9.82569		411	9.80487
		412	9.68022		412	9.79052		412	9.76162			412	9.82362		412	9.80489
		413	9.68035		413	9.79098		413	9.7611			413	9.82358		413	9.80552
		414	9.68046		414	9.79101		414	9.7606			414	9.82329		414	9.80545
		415	9.68034		415	9.79135		415	9.7621			415	9.82381		415	9.80483
		416	9.68076		416	9.79171		416	9.7626			416	9.82361		416	9.80381
		417	9.68109		417	9.79051		417	9.76294			417	9.82324		417	9.80339
		418	9.68202		418	9.78946		418	9.76326			418	9.82294		418	9.80335
		419	9.68286		419	9.78888		419	9.76401			419	9.82321		419	9.80359
		420	9.68367		420	9.78856		420	9.76391			420	9.82333		420	9.8043
		421	9.68391		421	9.78779		421	9.76473			421	9.82393		421	9.80377
		422	9.69047		422	9.78503		422	9.75386			422	9.82818		422	9.80585
		423	9.71872		423	9.7665		423	9.69528			423	9.85146		423	9.8085
		424	9.76397		424	9.72135		424	9.58943			424	9.89417		424	9.79101
		425	9.80555		425	9.65309		425	9.46866			425	9.94849		425	9.73807
		426	9.83808		426	9.57839		426	9.35929			426	9.99593		426	9.64761
		427	9.85558		427	9.51641		427	9.28797			427	10.028		427	9.53164
		428	9.84321		428	9.48471		428	9.28951			428	10.0308		428	9.40862
		429	9.80753		429	9.49095		429	9.35741			429	10.0069		429	9.31029
		430	9.77156		430	9.52932		430	9.45099			430	9.96705		430	9.25617
		431	9.74246		431	9.57878		431	9.53945			431	9.92955		431	9.25119
		432	9.72071		432	9.62245		432	9.60428			432	9.90139		432	9.27843
		433	9.7065		433	9.65557		433	9.64688			433	9.88108		433	9.32138
		434	9.69944		434	9.67815		434	9.67256			434	9.86738		434	9.36651
		435	9.69632		435	9.69287		435	9.6886			435	9.85773		435	9.40903
		436	9.6939		436	9.70645		436	9.69945			436	9.85233		436	9.44782
		437	9.69327		437	9.71826		437	9.70828			437	9.84936		437	9.48255
		438	9.69283		438	9.72625		438	9.71539			438	9.84862		438	9.51265
		439	9.6908		439	9.73384		439	9.72123			439	9.84764		439	9.5403
		440	9.68892		440	9.74091		440	9.72627			440	9.84692		440	9.56574
		441	9.68799		441	9.74572		441	9.73009			441	9.84568		441	9.58791
		442	9.68701		442	9.74938		442	9.73352			442	9.84413		442	9.60685
		443	9.68609		443	9.75497		443	9.73558			443	9.84108		443	9.62416
		444	9.68557		444	9.7596		444	9.73758			444	9.83882		444	9.63945
		445	9.68497		445	9.7636		445	9.7397			445	9.83688		445	9.65342
		446	9.68391		446	9.76697		446	9.74135			446	9.83573		446	9.6655
		447	9.68349		447	9.77018		447	9.74381			447	9.83411		447	9.67874
		448	9.68292		448	9.77163		448	9.7459			448	9.83329		448	9.69018
		449	9.68257		449	9.77386		449	9.74745			449	9.83083		449	9.70115
		450	9.68282		450	9.77698		450	9.74871			450	9.82989		450	9.71063
		451	9.68353		451	9.77896		451	9.75177			451	9.8293		451	9.71963
		452	9.68393		452	9.78033		452	9.7534			452	9.82948		452	9.72647
		453	9.68557		453	9.78198		453	9.75533			453	9.82932		453	9.7339
		454	9.68623		454	9.78214		454	9.75765			454	9.82981		454	9.74034
		455	9.68657		455	9.78223		455	9.7585			455	9.82896		455	9.74706
		456	9.6875		456	9.78257		456	9.75842			456	9.82829		456	9.75351
		457	9.68796		457	9.78236		457	9.75981			457	9.82765		457	9.75998
		458	9.68769		458	9.78433		458	9.76084			458	9.82692		458	9.76533
		459	9.68816		459	9.78648		459	9.76002			459	9.82776		459	9.77098
		460	9.68799		460	9.78696		460	9.76086			460	9.82818		460	9.77494
		461	9.68719		461	9.78938		461	9.76118			461	9.82825		461	9.7778
		462	9.68547		462	9.79141		462	9.76106			462	9.82843		462	9.78043
		463	9.68395		463	9.7913		463	9.76057			463	9.82863		463	9.7824
		464	9.68412		464	9.7901		464	9.76239			464	9.82824		464	9.78288
		465	9.68393		465	9.79028		465	9.76298			465	9.82859		465	9.78438
		466	9.68419		466	9.78807		466	9.76358			466	9.82891		466	9.7871
		467	9.68489		467	9.78718		467	9.7646			467	9.82846		467	9.78907
		468	9.68549		468	9.78675		468	9.76544			468	9.82921		468	9.79182
		469	9.68509		469	9.78721		469	9.76427			469	9.82962		469	9.79426
		470	9.68532		470	9.78768		470	9.76477			470	9.82859		470	9.79562
		471	9.6865		471	9.7887		471	9.76529			471	9.82792		471	9.79633
		472	9.68758		472	9.79026		472	9.76508			472	9.82803		472	9.79724
		473	9.68738		473	9.79009		473	9.76421			473	9.82766		473	9.79727
		474	9.68647		474	9.7914		474	9.7654			474	9.82771		474	9.7984
		475	9.68711		475	9.79252		475	9.76527			475	9.82896		475	9.79938
		476	9.68622		476	9.79336		476	9.76552			476	9.82973		476	9.79989
		477	9.68585		477	9.79321		477	9.7652			477	9.8307		477	9.8011
		478	9.68585		478	9.79484		478	9.7659			478	9.83174		478	9.80225
		479	9.68635		479	9.79517		479	9.76584			479	9.83292		479	9.80282
		480	9.68599		480	9.79512		480	9.76548			480	9.83364		480	9.80265
		481	9.68568		481	9.79435		481	9.76568			481	9.83402		481	9.80362
		482	9.68599		482	9.79428		482	9.76556			482	9.83332		482	9.8043
		483	9.68688		483	9.79346		483	9.76494			483	9.83338		483	9.80447
		484	9.68748		484	9.79308		484	9.76433			484	9.83188		484	9.805
		485	9.68655		485	9.79326		485	9.76455			485	9.83167		485	9.80644
		486	9.68665		486	9.79403		486	9.76349			486	9.83194		486	9.80714
		487	9.6864		487	9.79353		487	9.76336			487	9.83211		487	9.80742
		488	9.68544		488	9.79373		488	9.76371			488	9.8309		488	9.80752
		489	9.68437		489	9.79413		489	9.76337			489	9.83075		489	9.80636
		490	9.68528		490	9.79335		490	9.76304			490	9.82964		490	9.80536
		491	9.6855		491	9.7925		491	9.76356			491	9.8312		491	9.80571
		492	9.6855		492	9.79379		492	9.76277			492	9.83475		492	9.80592
		493	9.68594		493	9.79457		493	9.7622			493	9.83626		493	9.80639
		494	9.68683		494	9.79448		494	9.76305			494	9.83774		494	9.80706
		495	9.68672		495	9.79481		495	9.76434			495	9.83784		495	9.80784
		496	9.68693		496	9.79687		496	9.76516			496	9.83602		496	9.80702
		497	9.68673		497	9.79633		497	9.76775			497	9.83175		497	9.80632
		498	9.68638		498	9.79627		498	9.76886			498	9.82973		498	9.80628
		499	9.68614		499	9.79745		499	9.76847			499	9.82799		499	9.80734
		500	9.68625		500	9.79885		500	9.76747			500	9.82742		500	9.80782
		501	9.68648		501	9.7985		501	9.76728			501	9.82677		501	9.80835
		502	9.68597		502	9.79924		502	9.76645			502	9.82705		502	9.80879
		503	9.68636		503	9.79889		503	9.76689			503	9.82764		503	9.80943
		504	9.68578		504	9.79767		504	9.7674			504	9.82867		504	9.80907
		505	9.68497		505	9.79652		505	9.76782			505	9.82939		505	9.80939
		506	9.68566		506	9.7959		506	9.76701			506	9.82909		506	9.80947
		507	9.68671		507	9.79568		507	9.76669			507	9.829		507	9.80999
		508	9.68663		508	9.79577		508	9.76594			508	9.82682		508	9.80928
		509	9.68798		509	9.79616		509	9.76604			509	9.8252		509	9.8089
		510	9.68854		510	9.79687		510	9.76561			510	9.82531		510	9.80856
		511	9.68728		511	9.79761		511	9.76641			511	9.82601		511	9.80909
		512	9.68705		512	9.79796		512	9.76737			512	9.82649		512	9.80924
		513	9.68754		513	9.79786		513	9.76814			513	9.82936		513	9.80998
		514	9.6871		514	9.79772		514	9.76818			514	9.83065		514	9.81082
		515	9.68793		515	9.79669		515	9.76909			515	9.83083		515	9.81152
		516	9.68844		516	9.79574		516	9.76995			516	9.83065		516	9.81169
		517	9.68895		517	9.79684		517	9.76914			517	9.83136		517	9.81162
		518	9.69037		518	9.79811		518	9.76938			518	9.83169		518	9.81225
		519	9.69045		519	9.79993		519	9.76995			519	9.83242		519	9.81232
		520	9.68983		520	9.80103		520	9.76977			520	9.83293		520	9.81237
		521	9.68849		521	9.8012		521	9.76837			521	9.83339		521	9.81161
		522	9.68711		522	9.80004		522	9.76768			522	9.83321		522	9.81191
		523	9.68547		523	9.79869		523	9.76652			523	9.83293		523	9.81155
		524	9.68615		524	9.79706		524	9.76473			524	9.8328		524	9.81168
		525	9.68666		525	9.79788		525	9.76575			525	9.83269		525	9.81223
		526	9.68878		526	9.79887		526	9.76652			526	9.83253		526	9.81346
		527	9.69017		527	9.79973		527	9.76707			527	9.83245		527	9.81327
		528	9.69001		528	9.80017		528	9.76732			528	9.83349		528	9.81356
		529	9.69033		529	9.79957		529	9.76908			529	9.83448		529	9.81465
		530	9.6909		530	9.79822		530	9.76816			530	9.83496		530	9.81379
		531	9.68992		531	9.79809		531	9.76744			531	9.83529		531	9.81306
		532	9.69005		532	9.79703		532	9.76611			532	9.83506		532	9.81367
		533	9.69068		533	9.7976		533	9.76573			533	9.83418		533	9.8136
		534	9.6898		534	9.79929		534	9.76451			534	9.83322		534	9.81324
		535	9.68949		535	9.80068		535	9.76413			535	9.83271		535	9.81462
		536	9.6898		536	9.80227		536	9.76485			536	9.8333		536	9.81457
		537	9.68947		537	9.80284		537	9.76605			537	9.8339		537	9.81363
		538	9.68923		538	9.80219		538	9.76664			538	9.83431		538	9.81313
		539	9.68936		539	9.80104		539	9.76636			539	9.83452		539	9.81241
		540	9.68848		540	9.79977		540	9.76619			540	9.83478		540	9.81217
		541	9.68863		541	9.79832		541	9.76546			541	9.83446		541	9.81247
		542	9.68916		542	9.79815		542	9.7658			542	9.83464		542	9.81262
		543	9.68915		543	9.79855		543	9.76665			543	9.83535		543	9.81293
		544	9.68923		544	9.80062		544	9.76681			544	9.8338		544	9.81226
		545	9.69019		545	9.80134		545	9.76684			545	9.83295		545	9.81146
		546	9.69016		546	9.80041		546	9.76629			546	9.8332		546	9.81157
		547	9.69005		547	9.80049		547	9.76606			547	9.83449		547	9.81307
		548	9.68983		548	9.80106		548	9.76499			548	9.83363		548	9.81371
		549	9.68947		549	9.79984		549	9.76531			549	9.83655		549	9.81499
		550	9.6888		550	9.80013		550	9.76536			550	9.83871		550	9.81516
		551	9.68947		551	9.8018		551	9.76626			551	9.83855		551	9.81502
		552	9.68956		552	9.8024		552	9.76705			552	9.8379		552	9.81324
		553	9.6893		553	9.80241		553	9.76754			553	9.83857		553	9.81259
		554	9.68905		554	9.80347		554	9.76759			554	9.83814		554	9.81189
		555	9.69016		555	9.80489		555	9.7674			555	9.83805		555	9.81241
		556	9.68989		556	9.80468		556	9.7671			556	9.83806		556	9.81377
		557	9.69015		557	9.80435		557	9.76759			557	9.83777		557	9.8156
		558	9.69082		558	9.8051		558	9.76804			558	9.83676		558	9.81542
		559	9.69217		559	9.80471		559	9.76946			559	9.83619		559	9.81588
		560	9.69092		560	9.80319		560	9.77078			560	9.83618		560	9.81635
		561	9.69057		561	9.80464		561	9.77187			561	9.83733		561	9.81584
		562	9.69034		562	9.80503		562	9.77167			562	9.83825		562	9.81463
		563	9.69139		563	9.80334		563	9.77135			563	9.83933		563	9.81512
		564	9.69104		564	9.80257		564	9.77005			564	9.83926		564	9.81514
		565	9.69201		565	9.80175		565	9.7688			565	9.83819		565	9.81489
		566	9.69235		566	9.80152		566	9.76759			566	9.83726		566	9.81448
		567	9.69199		567	9.80252		567	9.76648			567	9.83617		567	9.81529
		568	9.69036		568	9.80361		568	9.76653			568	9.83539		568	9.81601
		569	9.68957		569	9.80425		569	9.76754			569	9.83516		569	9.81617
		570	9.68887		570	9.80568		570	9.76832			570	9.83491		570	9.81613
		571	9.68882		571	9.80414		571	9.76799			571	9.83502		571	9.81768
		572	9.68877		572	9.80391		572	9.76765			572	9.83428		572	9.81846
		573	9.68983		573	9.80451		573	9.76765			573	9.83517		573	9.81865
		574	9.6912		574	9.80479		574	9.76726			574	9.83512		574	9.81914
		575	9.69184		575	9.80427		575	9.76727			575	9.83544		575	9.81931
		576	9.69229		576	9.80497		576	9.76836			576	9.83592		576	9.81858
		577	9.6927		577	9.80441		577	9.76855			577	9.83767		577	9.81785
		578	9.69304		578	9.80521		578	9.76707			578	9.83836		578	9.81742
		579	9.69276		579	9.80559		579	9.76538			579	9.83906		579	9.81704
		580	9.69301		580	9.80644		580	9.76326			580	9.83866		580	9.81731
		581	9.69292		581	9.80669		581	9.76207			581	9.83761		581	9.81694
		582	9.69374		582	9.80694		582	9.76197			582	9.83604		582	9.81682
		583	9.69313		583	9.80641		583	9.76319			583	9.83499		583	9.818
		584	9.69335		584	9.80662		584	9.7644			584	9.83508		584	9.81941
		585	9.69354		585	9.80679		585	9.76578			585	9.83662		585	9.81998
		586	9.69276		586	9.80736		586	9.7677			586	9.83756		586	9.82033
		587	9.69237		587	9.80777		587	9.76891			587	9.83861		587	9.82078
		588	9.69303		588	9.807		588	9.77017			588	9.83902		588	9.81973
		589	9.69269		589	9.80685		589	9.7701			589	9.83846		589	9.81869
		590	9.69269		590	9.80702		590	9.76879			590	9.83787		590	9.81832
		591	9.69336		591	9.80784		591	9.76649			591	9.83807		591	9.81897
		592	9.69297		592	9.80841		592	9.76481			592	9.8381		592	9.81988
		593	9.69245		593	9.80896		593	9.76274			593	9.83877		593	9.82009
		594	9.69235		594	9.80826		594	9.7629			594	9.8397		594	9.82014
		595	9.69211		595	9.80748		595	9.76525			595	9.83967		595	9.81982
		596	9.6917		596	9.80624		596	9.76711			596	9.83895		596	9.82003
		597	9.69225		597	9.80568		597	9.76824			597	9.83854		597	9.81936
		598	9.69348		598	9.80584		598	9.76942			598	9.83715		598	9.81907
		599	9.69344		599	9.80662		599	9.76967			599	9.83707		599	9.81887
		600	9.69302		600	9.80668		600	9.769			600	9.83773		600	9.8183
		601	9.69344		601	9.80723		601	9.77019			601	9.83862		601	9.81744
		602	9.69519		602	9.8063		602	9.76244			602	9.84155		602	9.8191
		603	9.71158		603	9.79533		603	9.7119			603	9.86436		603	9.82694
		604	9.75136		604	9.76177		604	9.61311			604	9.90631		604	9.82664
		605	9.79601		605	9.70502		605	9.4942			605	9.95966		605	9.801
		606	9.83236		606	9.63401		606	9.38156			606	10.0065		606	9.73831
		607	9.85668		607	9.56905		607	9.30312			607	10.0391		607	9.6471
		608	9.8578		608	9.52703		608	9.29159			608	10.0428		608	9.53784
		609	9.82974		609	9.51967		609	9.34834			609	10.0191		609	9.4359
		610	9.79305		610	9.54506		610	9.43766			610	9.97833		610	9.36635
		611	9.76129		611	9.59031		611	9.52696			611	9.94111		611	9.34099
		612	9.73922		612	9.63522		612	9.59573			612	9.91282		612	9.34955
		613	9.72423		613	9.66999		613	9.64245			613	9.89274		613	9.37893
		614	9.71527		614	9.69428		614	9.67252			614	9.87943		614	9.41489
		615	9.71103		615	9.71298		615	9.68902			615	9.87151		615	9.44924
		616	9.70922		616	9.72623		616	9.69927			616	9.86722		616	9.47996
		617	9.70712		617	9.73751		617	9.70647			617	9.86559		617	9.50848
		618	9.70621		618	9.7462		618	9.71254			618	9.86487		618	9.53259
		619	9.70533		619	9.75413		619	9.71595			619	9.86456		619	9.55513
		620	9.70384		620	9.75931		620	9.72168			620	9.86349		620	9.57689
		621	9.7024		621	9.76494		621	9.72641			621	9.86038		621	9.59764
		622	9.70155		622	9.76893		622	9.73039			622	9.85875		622	9.61528
		623	9.69984		623	9.77292		623	9.73443			623	9.85693		623	9.63218
		624	9.69875		624	9.77664		624	9.73817			624	9.8545		624	9.6469
		625	9.69736		625	9.78018		625	9.74102			625	9.8529		625	9.66045
		626	9.69663		626	9.7822		626	9.7436			626	9.85216		626	9.67153
		627	9.69575		627	9.78393		627	9.74631			627	9.85023		627	9.68263
		628	9.69557		628	9.78669		628	9.74837			628	9.84792		628	9.69261
		629	9.6961		629	9.78809		629	9.74853			629	9.84543		629	9.70319
		630	9.69622		630	9.79017		630	9.74942			630	9.84335		630	9.71205
		631	9.69645		631	9.7929		631	9.75084			631	9.84246		631	9.72232
		632	9.69644		632	9.79412		632	9.7519			632	9.84173		632	9.73252
		633	9.69619		633	9.79589		633	9.75258			633	9.84207		633	9.74153
		634	9.6961		634	9.79848		634	9.75423			634	9.84332		634	9.74963
		635	9.69675		635	9.8002		635	9.75557			635	9.84485		635	9.75667
		636	9.69692		636	9.80088		636	9.75715			636	9.8449		636	9.76234
		637	9.69784		637	9.80246		637	9.75832			637	9.84418		637	9.76723
		638	9.69848		638	9.80314		638	9.7586			638	9.84398		638	9.77236
		639	9.69796		639	9.8033		639	9.76053			639	9.84381		639	9.77661
		640	9.6982		640	9.80447		640	9.76134			640	9.84373		640	9.78109
		641	9.69861		641	9.80554		641	9.7618			641	9.84383		641	9.78435
		642	9.69821		642	9.80735		642	9.76168			642	9.84572		642	9.78728
		643	9.69773		643	9.80773		643	9.76267			643	9.84699		643	9.78993
		644	9.69776		644	9.80838		644	9.76299			644	9.84749		644	9.79283
		645	9.69646		645	9.80899		645	9.76457			645	9.84674		645	9.79605
		646	9.69538		646	9.80932		646	9.7644			646	9.84588		646	9.80018
		647	9.69519		647	9.80968		647	9.76433			647	9.84408		647	9.8022
		648	9.69574		648	9.81156		648	9.76402			648	9.84301		648	9.80361
		649	9.6962		649	9.81206		649	9.76475			649	9.84289		649	9.80504
		650	9.69697		650	9.8118		650	9.76549			650	9.84361		650	9.8058
		651	9.69697		651	9.81235		651	9.76616			651	9.84446		651	9.80571
		652	9.69657		652	9.81144		652	9.76671			652	9.84554		652	9.80678
		653	9.69563		653	9.81042		653	9.76831			653	9.8461		653	9.80867
		654	9.69507		654	9.81099		654	9.76794			654	9.84512		654	9.80952
		655	9.6945		655	9.81079		655	9.76752			655	9.84315		655	9.81022
		656	9.69415		656	9.8097		656	9.76721			656	9.84332		656	9.81077
		657	9.6945		657	9.81061		657	9.76821			657	9.84345		657	9.81237
		658	9.69549		658	9.81075		658	9.76826			658	9.84323		658	9.81282
		659	9.69584		659	9.81041		659	9.77034			659	9.84382		659	9.8136
		660	9.69603		660	9.81125		660	9.77055			660	9.84483		660	9.81441
		661	9.69666		661	9.81211		661	9.77059			661	9.8445		661	9.81613
		662	9.69682		662	9.81197		662	9.77012			662	9.84359		662	9.81666
		663	9.6967		663	9.81212		663	9.76962			663	9.843		663	9.818
		664	9.69719		664	9.81149		664	9.76728			664	9.84302		664	9.81817
		665	9.69823		665	9.81156		665	9.76632			665	9.84238		665	9.81862
		666	9.69855		666	9.81261		666	9.76674			666	9.84269		666	9.81864
		667	9.69867		667	9.81293		667	9.7676			667	9.84267		667	9.81909
		668	9.6991		668	9.81283		668	9.76823			668	9.84206		668	9.8192
		669	9.6984		669	9.81388		669	9.76789			669	9.84233		669	9.82031
		670	9.69723		670	9.81249		670	9.76768			670	9.84281		670	9.82142
		671	9.69633		671	9.81255		671	9.7687			671	9.8435		671	9.82148
		672	9.6962		672	9.81287		672	9.76747			672	9.84392		672	9.82186
		673	9.69547		673	9.81295		673	9.76599			673	9.8448		673	9.82101
		674	9.69568		674	9.81285		674	9.76616			674	9.84477		674	9.82058
		675	9.6955		675	9.81413		675	9.76626			675	9.84453		675	9.81921
		676	9.69496		676	9.81395		676	9.7656			676	9.84344		676	9.82022
		677	9.69279		677	9.8142		677	9.76641			677	9.84327		677	9.82017
		678	9.69063		678	9.81525		678	9.76704			678	9.84265		678	9.82131
		679	9.68938		679	9.81624		679	9.7683			679	9.84194		679	9.82116
		680	9.68819		680	9.81581		680	9.76781			680	9.8424		680	9.8222
		681	9.68714		681	9.81555		681	9.76622			681	9.84301		681	9.82244
		682	9.68774		682	9.81598		682	9.76552			682	9.8434		682	9.82281
		683	9.68916		683	9.81563		683	9.76592			683	9.84463		683	9.82246
		684	9.68918		684	9.81462		684	9.76509			684	9.84638		684	9.8222
		685	9.69049		685	9.81541		685	9.76486			685	9.8471		685	9.82166
		686	9.69152		686	9.81473		686	9.76612			686	9.8471		686	9.8208
		687	9.69263		687	9.8137		687	9.76698			687	9.84749		687	9.82145
		688	9.69242		688	9.8125		688	9.76683			688	9.84675		688	9.82199
		689	9.69295		689	9.81329		689	9.76637			689	9.8454		689	9.82364
		690	9.69347		690	9.81298		690	9.76725			690	9.84479		690	9.8243
		691	9.69532		691	9.81395		691	9.76663			691	9.84553		691	9.82456
		692	9.69588		692	9.81466		692	9.76571			692	9.84533		692	9.82261
		693	9.69688		693	9.81494		693	9.7657			693	9.84462		693	9.82231
		694	9.69654		694	9.81527		694	9.76551			694	9.84405		694	9.82219
		695	9.69629		695	9.81622		695	9.76536			695	9.8431		695	9.82214
		696	9.69489		696	9.81575		696	9.76552			696	9.84152		696	9.82176
		697	9.69388		697	9.81506		697	9.7655			697	9.84144		697	9.82324
		698	9.69326		698	9.81541		698	9.76648			698	9.84245		698	9.82329
		699	9.69336		699	9.81442		699	9.76756			699	9.84373		699	9.82259
		700	9.69289		700	9.81326		700	9.76766			700	9.84506		700	9.82326
		701	9.69356		701	9.81337		701	9.76807			701	9.84632		701	9.82436
		702	9.69387		702	9.81422		702	9.76775			702	9.8464		702	9.82507
		703	9.69423		703	9.81445		703	9.76711			703	9.84598		703	9.8263
		704	9.69467		704	9.81511		704	9.76642			704	9.84531		704	9.82709
		705	9.69507		705	9.81554		705	9.76656			705	9.84484		705	9.8277
		706	9.69555		706	9.8162		706	9.76643			706	9.84444		706	9.82871
		707	9.69568		707	9.81663		707	9.76773			707	9.84526		707	9.82887
		708	9.69556		708	9.81704		708	9.76793			708	9.84566		708	9.8282
		709	9.69594		709	9.81783		709	9.76862			709	9.84615		709	9.82706
		710	9.69607		710	9.81813		710	9.76882			710	9.84615		710	9.82586
		711	9.69612		711	9.81724		711	9.76822			711	9.84638		711	9.82518
		712	9.69582		712	9.81615		712	9.76784			712	9.84467		712	9.82521
		713	9.69663		713	9.81567		713	9.76749			713	9.84496		713	9.8259
		714	9.69689		714	9.81411		714	9.76726			714	9.84461		714	9.82791
		715	9.69707		715	9.81334		715	9.76723			715	9.84495		715	9.82888
		716	9.69671		716	9.8138		716	9.76791			716	9.84589		716	9.82934
		717	9.69732		717	9.81403		717	9.76823			717	9.84751		717	9.82896
		718	9.69624		718	9.81438		718	9.76923			718	9.84708		718	9.82937
		719	9.69664		719	9.81465		719	9.76907			719	9.8469		719	9.82965
		720	9.69672		720	9.81572		720	9.769			720	9.84621		720	9.82954
		721	9.69728		721	9.81629		721	9.7697			721	9.84469		721	9.82964
		722	9.69829		722	9.81605		722	9.7708			722	9.84355		722	9.83068
		723	9.70019		723	9.81624		723	9.77078			723	9.84409		723	9.83077
		724	9.70001		724	9.81683		724	9.77192			724	9.84565		724	9.82988
		725	9.70023		725	9.81635		725	9.77305			725	9.84728		725	9.82995
		726	9.70021		726	9.81637		726	9.77396			726	9.84819		726	9.82936
		727	9.69895		727	9.81742		727	9.77375			727	9.84939		727	9.82842
		728	9.69776		728	9.81753		728	9.77325			728	9.8501		728	9.8281
		729	9.69733		729	9.81796		729	9.77282			729	9.84893		729	9.82846
		730	9.6968		730	9.81777		730	9.7731			730	9.84851		730	9.82827
		731	9.69643		731	9.81833		731	9.77185			731	9.84843		731	9.82816
		732	9.69607		732	9.81806		732	9.77121			732	9.8471		732	9.82809
		733	9.69567		733	9.81775		733	9.77144			733	9.84626		733	9.82823
		734	9.69573		734	9.81779		734	9.7719			734	9.84699		734	9.82784
		735	9.69654		735	9.81724		735	9.77085			735	9.84796		735	9.82807
		736	9.69685		736	9.81592		736	9.77086			736	9.8487		736	9.82848
		737	9.69757		737	9.81542		737	9.76993			737	9.85065		737	9.8298
		738	9.69773		738	9.8166		738	9.7682			738	9.85108		738	9.83047
		739	9.69803		739	9.81617		739	9.76725			739	9.85121		739	9.83091
		740	9.69866		740	9.81791		740	9.76696			740	9.85046		740	9.83058
		741	9.69847		741	9.81868		741	9.76724			741	9.84988		741	9.82989
		742	9.69831		742	9.81961		742	9.7685			742	9.84933		742	9.82893
		743	9.69874		743	9.81921		743	9.77012			743	9.84946		743	9.828
		744	9.69907		744	9.8199		744	9.77105			744	9.84953		744	9.82845
		745	9.69808		745	9.81982		745	9.77184			745	9.85008		745	9.82872
		746	9.69828		746	9.82022		746	9.77249			746	9.84994		746	9.82953
		747	9.69908		747	9.82074		747	9.77284			747	9.84937		747	9.82949
		748	9.69931		748	9.8196		748	9.77297			748	9.84912		748	9.82934
		749	9.6986		749	9.81863		749	9.77262			749	9.84933		749	9.82883
		750	9.69876		750	9.81889		750	9.77248			750	9.84886		750	9.82941
		751	9.69897		751	9.81862		751	9.7719			751	9.84932		751	9.8287
		752	9.69849		752	9.81876		752	9.7713			752	9.84908		752	9.82857
		753	9.69878		753	9.8199		753	9.77108			753	9.84889		753	9.82925
		754	9.69996		754	9.82032		754	9.77101			754	9.84884		754	9.82956
		755	9.69959		755	9.81957		755	9.77216			755	9.84937		755	9.82982
		756	9.69885		756	9.81987		756	9.77425			756	9.8494		756	9.83056
		757	9.69854		757	9.81907		757	9.7753			757	9.84982		757	9.83171
		758	9.69721		758	9.81943		758	9.77593			758	9.85017		758	9.83159
		759	9.69671		759	9.81938		759	9.77623			759	9.84916		759	9.83032
		760	9.69705		760	9.81883		760	9.77617			760	9.84863		760	9.82938
		761	9.69811		761	9.81848		761	9.77518			761	9.84804		761	9.83026
		762	9.6994		762	9.81952		762	9.774			762	9.848		762	9.82999
		763	9.70125		763	9.81972		763	9.77289			763	9.84795		763	9.82957
		764	9.70165		764	9.82062		764	9.77236			764	9.84833		764	9.83005
		765	9.70178		765	9.82107		765	9.77011			765	9.84854		765	9.83115
		766	9.70179		766	9.82047		766	9.76856			766	9.84884		766	9.83124
		767	9.70103		767	9.81899		767	9.76895			767	9.84973		767	9.83142
		768	9.70008		768	9.81803		768	9.77045			768	9.85064		768	9.83186
		769	9.70009		769	9.81792		769	9.77164			769	9.85157		769	9.83285
		770	9.70129		770	9.81898		770	9.77338			770	9.85242		770	9.83241
		771	9.70133		771	9.82062		771	9.7741			771	9.8538		771	9.83128
		772	9.70227		772	9.82163		772	9.7736			772	9.85425		772	9.83108
		773	9.70254		773	9.82351		773	9.77332			773	9.85432		773	9.8315
		774	9.70224		774	9.82353		774	9.77275			774	9.85479		774	9.83206
		775	9.70082		775	9.82271		775	9.77229			775	9.85544		775	9.83206
		776	9.70045		776	9.82202		776	9.77096			776	9.8548		776	9.83238
		777	9.70002		777	9.82274		777	9.77113			777	9.85288		777	9.83241
		778	9.70017		778	9.82194		778	9.77045			778	9.85306		778	9.83301
		779	9.69985		779	9.82271		779	9.77028			779	9.85451		779	9.83349
		780	9.70025		780	9.82414		780	9.77094			780	9.85558		780	9.83412
		781	9.69977		781	9.82411		781	9.7725			781	9.85693		781	9.8353
		782	9.70289		782	9.82343		782	9.76927			782	9.85996		782	9.83751
		783	9.72535		783	9.81523		783	9.73353			783	9.87546		783	9.84665
		784	9.76657		784	9.78877		784	9.64834			784	9.91003		784	9.84983
		785	9.8063		785	9.73821		785	9.53492			785	9.95927		785	9.83383
		786	9.8398		786	9.6737		786	9.42138			786	10.0069		786	9.78413
		787	9.86076		787	9.60997		787	9.33287			787	10.0436		787	9.70738
		788	9.85444		788	9.56437		788	9.30225			788	10.0566		788	9.61214
		789	9.82372		789	9.54728		789	9.34284			789	10.0403		789	9.52187
		790	9.79004		790	9.56407		790	9.42409			790	10.0035		790	9.45493
		791	9.76101		791	9.60235		791	9.51337			791	9.9651		791	9.42727
		792	9.73973		792	9.64325		792	9.58693			792	9.93422		792	9.43186
		793	9.72605		793	9.67786		793	9.63779			793	9.91166		793	9.4527
		794	9.71803		794	9.70419		794	9.66972			794	9.89711		794	9.47989
		795	9.71425		795	9.72282		795	9.69008			795	9.88745		795	9.50672
		796	9.71313		796	9.73676		796	9.70396			796	9.88221		796	9.53094
		797	9.7121		797	9.74855		797	9.71344			797	9.87911		797	9.5527
		798	9.71123		798	9.75806		798	9.71987			798	9.87717		798	9.57312
		799	9.71025		799	9.76569		799	9.7239			799	9.87626		799	9.59099
		800	9.70898		800	9.77197		800	9.72756			800	9.87499		800	9.60852
		801	9.70667		801	9.77722		801	9.73016			801	9.87249		801	9.6258
		802	9.70547		802	9.78176		802	9.73268			802	9.87093		802	9.64148
		803	9.70487		803	9.78531		803	9.73526			803	9.8699		803	9.65444
		804	9.70425		804	9.78935		804	9.73882			804	9.86747		804	9.66608
		805	9.7038		805	9.79331		805	9.74284			805	9.8663		805	9.6776
		806	9.70385		806	9.79712		806	9.74798			806	9.86494		806	9.68747
		807	9.70347		807	9.80062		807	9.75265			807	9.86347		807	9.69552
		808	9.70276		808	9.80382		808	9.75662			808	9.8604		808	9.7045
		809	9.70224		809	9.80511		809	9.7592			809	9.85835		809	9.71371
		810	9.70181		810	9.80616		810	9.75944			810	9.8561		810	9.72223
		811	9.70196		811	9.80829		811	9.75953			811	9.8551		811	9.72908
		812	9.70284		812	9.81042		812	9.75911			812	9.85509		812	9.73733
		813	9.70256		813	9.81237		813	9.76167			813	9.85547		813	9.74485
		814	9.70257		814	9.81491		814	9.76566			814	9.85582		814	9.75175
		815	9.70236		815	9.81646		815	9.76924			815	9.85584		815	9.75686
		816	9.70196		816	9.81797		816	9.77			816	9.85567		816	9.76379
		817	9.7008		817	9.81856		817	9.76958			817	9.85484		817	9.76999
		818	9.70163		818	9.81879		818	9.76799			818	9.85516		818	9.77537
		819	9.70231		819	9.8194		819	9.76564			819	9.85581		819	9.78019
		820	9.70242		820	9.82024		820	9.76512			820	9.85665		820	9.78478
		821	9.70305		821	9.81944		821	9.76551			821	9.85737		821	9.7898
		822	9.70317		822	9.8204		822	9.76739			822	9.85763		822	9.79352
		823	9.70197		823	9.82078		823	9.76837			823	9.8567		823	9.79689
		824	9.70152		824	9.82041		824	9.76859			824	9.85653		824	9.80068
		825	9.7019		825	9.81978		825	9.7691			825	9.85778		825	9.80542
		826	9.70128		826	9.81971		826	9.77064			826	9.85777		826	9.80742
		827	9.70182		827	9.81798		827	9.77149			827	9.85731		827	9.81008
		828	9.70364		828	9.8195		828	9.77278			828	9.85706		828	9.81251
		829	9.70412		829	9.8215		829	9.77414			829	9.85601		829	9.81406
		830	9.70388		830	9.82236		830	9.77397			830	9.85367		830	9.81512
		831	9.7044		831	9.82251		831	9.77503			831	9.85271		831	9.8166
		832	9.70484		832	9.82336		832	9.7766			832	9.85308		832	9.81699
		833	9.70401		833	9.82256		833	9.77781			833	9.85323		833	9.81846
		834	9.70381		834	9.82156		834	9.77859			834	9.85293		834	9.82025
		835	9.70495		835	9.82271		835	9.7797			835	9.85267		835	9.82112
		836	9.70525		836	9.82456		836	9.77801			836	9.85367		836	9.82246
		837	9.70548		837	9.8255		837	9.77766			837	9.85501		837	9.82427
		838	9.70685		838	9.82566		838	9.77748			838	9.85632		838	9.82502
		839	9.70763		839	9.8266		839	9.77742			839	9.85748		839	9.82468
		840	9.70696		840	9.82664		840	9.77679			840	9.85821		840	9.82521
		841	9.70683		841	9.82587		841	9.77803			841	9.85738		841	9.82595
		842	9.70658		842	9.82602		842	9.7764			842	9.85554		842	9.82723
		843	9.7057		843	9.82608		843	9.77567			843	9.85481		843	9.82729
		844	9.70539		844	9.82552		844	9.77598			844	9.85471		844	9.8283
		845	9.70532		845	9.82544		845	9.77757			845	9.85438		845	9.82911
		846	9.70458		846	9.8261		846	9.77814			846	9.85412		846	9.82766
		847	9.7038		847	9.82623		847	9.7792			847	9.85467		847	9.82645
		848	9.70359		848	9.82621		848	9.77903			848	9.85468		848	9.82598
		849	9.70355		849	9.82664		849	9.77868			849	9.85554		849	9.82592
		850	9.70381		850	9.82801		850	9.77768			850	9.85523		850	9.82643
		851	9.70453		851	9.8279		851	9.77818			851	9.85539		851	9.82862
		852	9.7052		852	9.82836		852	9.77787			852	9.85519		852	9.82961
		853	9.70508		853	9.8283		853	9.77768			853	9.85566		853	9.83064
		854	9.70392		854	9.82859		854	9.77718			854	9.85492		854	9.83124
		855	9.70318		855	9.82738		855	9.77742			855	9.85672		855	9.83159
		856	9.70302		856	9.82698		856	9.77642			856	9.85797		856	9.83079
		857	9.70312		857	9.82698		857	9.77749			857	9.85791		857	9.83087
		858	9.70419		858	9.82737		858	9.7785			858	9.85798		858	9.8324
		859	9.70569		859	9.82731		859	9.77885			859	9.858		859	9.83273
		860	9.70736		860	9.82829		860	9.77838			860	9.8573		860	9.83294
		861	9.70809		861	9.82883		861	9.77803			861	9.85745		861	9.83431
		862	9.70854		862	9.82882		862	9.77795			862	9.85922		862	9.83499
		863	9.70781		863	9.82923		863	9.77801			863	9.86067		863	9.83473
		864	9.70792		864	9.82985		864	9.77908			864	9.8612		864	9.83528
		865	9.707		865	9.82881		865	9.77963			865	9.86066		865	9.83472
		866	9.7066		866	9.82961		866	9.77907			866	9.85956		866	9.83461
		867	9.70711		867	9.8302		867	9.77871			867	9.85799		867	9.83411
		868	9.70765		868	9.83069		868	9.77908			868	9.85585		868	9.8338
		869	9.70762		869	9.83063		869	9.7786			869	9.85561		869	9.8339
		870	9.70828		870	9.83092		870	9.7791			870	9.85721		870	9.83495
		871	9.70724		871	9.83029		871	9.78064			871	9.85792		871	9.83542
		872	9.70623		872	9.82981		872	9.78068			872	9.85932		872	9.83643
		873	9.7052		873	9.82993		873	9.78039			873	9.86069		873	9.83694
		874	9.70535		874	9.82895		874	9.78055			874	9.86132		874	9.83643
		875	9.70554		875	9.83118		875	9.78145			875	9.86041		875	9.83592
		876	9.70698		876	9.83302		876	9.78121			876	9.85968		876	9.8349
		877	9.70629		877	9.83309		877	9.78147			877	9.85882		877	9.83407
		878	9.70625		878	9.83231		878	9.78177			878	9.85851		878	9.83409
		879	9.70552		879	9.83293		879	9.78156			879	9.85869		879	9.83483
		880	9.70441		880	9.83198		880	9.7808			880	9.85987		880	9.83549
		881	9.70433		881	9.83136		881	9.78193			881	9.86192		881	9.8365
		882	9.70486		882	9.83136		882	9.78198			882	9.86198		882	9.83698
		883	9.70482		883	9.83146		883	9.78257			883	9.86204		883	9.83679
		884	9.70476		884	9.83241		884	9.78391			884	9.8622		884	9.83717
		885	9.70504		885	9.83143		885	9.78566			885	9.86246		885	9.83766
		886	9.7045		886	9.83074		886	9.78638			886	9.86239		886	9.83763
		887	9.70545		887	9.83184		887	9.78775			887	9.86323		887	9.83782
		888	9.70625		888	9.83187		888	9.78749			888	9.86292		888	9.83757
		889	9.70678		889	9.83084		889	9.78711			889	9.86111		889	9.83749
		890	9.70695		890	9.83213		890	9.78512			890	9.85884		890	9.83705
		891	9.70786		891	9.8322		891	9.78278			891	9.8575		891	9.83768
		892	9.70775		892	9.83185		892	9.7817			892	9.85718		892	9.83911
		893	9.70708		893	9.83255		893	9.78181			893	9.85828		893	9.84096
		894	9.70705		894	9.83369		894	9.78229			894	9.86009		894	9.84044
		895	9.70749		895	9.83243		895	9.78266			895	9.8612		895	9.84037
		896	9.70633		896	9.8319		896	9.7836			896	9.8612		896	9.83949
		897	9.70506		897	9.83142		897	9.78388			897	9.86051		897	9.83832
		898	9.70503		898	9.83068		898	9.7836			898	9.86032		898	9.8366
		899	9.70469		899	9.8299		899	9.78134			899	9.86031		899	9.83658
		900	9.70467		900	9.8304		900	9.78095			900	9.86018		900	9.83628
		901	9.70575		901	9.8314		901	9.78129			901	9.86027		901	9.83626
		902	9.70675		902	9.8329		902	9.78074			902	9.86125		902	9.83711
		903	9.70739		903	9.83384		903	9.78071			903	9.86115		903	9.83882
		904	9.70737		904	9.83425		904	9.78181			904	9.86066		904	9.83964
		905	9.70812		905	9.83366		905	9.78257			905	9.86142		905	9.8407
		906	9.7086		906	9.83239		906	9.7822			906	9.86196		906	9.84124
		907	9.70875		907	9.83071		907	9.78431			907	9.86208		907	9.83988
		908	9.70848		908	9.83073		908	9.78573			908	9.86156		908	9.83827
		909	9.70991		909	9.83089		909	9.78612			909	9.86192		909	9.8378
		910	9.71072		910	9.83223		910	9.786			910	9.86193		910	9.83706
		911	9.71113		911	9.83305		911	9.78806			911	9.86162		911	9.83751
		912	9.7114		912	9.83342		912	9.78733			912	9.8609		912	9.83845
		913	9.71203		913	9.83441		913	9.78718			913	9.86169		913	9.83951
		914	9.71142		914	9.83445		914	9.78711			914	9.86215		914	9.84062
		915	9.70998		915	9.8334		915	9.78787			915	9.86103		915	9.84085
		916	9.70919		916	9.83414		916	9.78583			916	9.86144		916	9.84082
		917	9.70997		917	9.83486		917	9.78483			917	9.86164		917	9.84101
		918	9.71092		918	9.83344		918	9.78301			918	9.86038		918	9.84099
		919	9.71148		919	9.83318		919	9.78342			919	9.86111		919	9.83996
		920	9.71213		920	9.83346		920	9.78274			920	9.86143		920	9.83991
		921	9.71148		921	9.83312		921	9.78368			921	9.86115		921	9.83995
		922	9.71085		922	9.83335		922	9.78448			922	9.86233		922	9.83942
		923	9.71001		923	9.83423		923	9.78539			923	9.86315		923	9.83882
		924	9.70944		924	9.83452		924	9.78582			924	9.86172		924	9.83948
		925	9.70844		925	9.83437		925	9.78636			925	9.86191		925	9.84004
		926	9.70887		926	9.83436		926	9.7867			926	9.86126		926	9.84061
		927	9.70803		927	9.83384		927	9.78653			927	9.86068		927	9.84158
		928	9.70774		928	9.83307		928	9.78736			928	9.86061		928	9.84232
		929	9.70767		929	9.83297		929	9.78707			929	9.86139		929	9.84191
		930	9.70778		930	9.83451		930	9.78856			930	9.86264		930	9.84203
		931	9.70793		931	9.83468		931	9.78833			931	9.86272		931	9.84216
		932	9.70872		932	9.83457		932	9.78851			932	9.86213		932	9.84222
		933	9.70934		933	9.8352		933	9.78804			933	9.86193		933	9.84271
		934	9.71014		934	9.83629		934	9.78806			934	9.86078		934	9.84372
		935	9.71093		935	9.83582		935	9.78634			935	9.8605		935	9.84388
		936	9.71068		936	9.83574		936	9.78712			936	9.86169		936	9.84365
		937	9.70984		937	9.83532		937	9.7883			937	9.8621		937	9.84309
		938	9.70921		938	9.83465		938	9.78881			938	9.86232		938	9.84285
		939	9.70804		939	9.83357		939	9.78886			939	9.86281		939	9.84248
		940	9.70759		940	9.83346		940	9.78883			940	9.86263		940	9.84289
		941	9.70745		941	9.83473		941	9.78848			941	9.86239		941	9.84328
		942	9.70792		942	9.83547		942	9.7882			942	9.86323		942	9.84485
		943	9.70826		943	9.83632		943	9.78805			943	9.86401		943	9.84497
		944	9.70877		944	9.83679		944	9.78966			944	9.8644		944	9.8449
		945	9.708		945	9.83705		945	9.79056			945	9.86528		945	9.84431
		946	9.70855		946	9.83641		946	9.79082			946	9.86659		946	9.84401
		947	9.70896		947	9.83714		947	9.7912			947	9.86676		947	9.84312
		948	9.70949		948	9.8372		948	9.79115			948	9.86583		948	9.84365
		949	9.71021		949	9.83642		949	9.78894			949	9.86335		949	9.84398
		950	9.71166		950	9.83619		950	9.7885			950	9.86089		950	9.84406
		951	9.71207		951	9.83712		951	9.78764			951	9.86001		951	9.84485
		952	9.71275		952	9.83647		952	9.78644			952	9.86053		952	9.84526
		953	9.71255		953	9.83604		953	9.78686			953	9.86248		953	9.84404
		954	9.71209		954	9.83663		954	9.78853			954	9.86761		954	9.84346
		955	9.71058		955	9.83639		955	9.78867			955	9.87001		955	9.84324
		956	9.70948		956	9.83497		956	9.78918			956	9.87066		956	9.84215
		957	9.70876		957	9.8346		957	9.78984			957	9.86931		957	9.84174
		958	9.70932		958	9.83497		958	9.78792			958	9.86745		958	9.8427
		959	9.70981		959	9.83456		959	9.78611			959	9.86561		959	9.84383
		960	9.71087		960	9.83509		960	9.78505			960	9.86523		960	9.84452
		961	9.71128		961	9.83543		961	9.78426			961	9.86424		961	9.84448
		962	9.71291		962	9.83565		962	9.78152			962	9.86628		962	9.84456
		963	9.72967		963	9.83029		963	9.75139			963	9.88253		963	9.85396
		964	9.76621		964	9.80855		964	9.67361			964	9.91643		964	9.86559
		965	9.80705		965	9.76097		965	9.56399			965	9.96513		965	9.8657
		966	9.84063		966	9.69958		966	9.45056			966	10.0127		966	9.83797
		967	9.86444		967	9.63939		967	9.35781			967	10.0482		967	9.78469
		968	9.86497		968	9.59335		968	9.31927			968	10.0594		968	9.70825
		969	9.83932		969	9.576		969	9.34858			969	10.0447		969	9.62549
		970	9.80611		970	9.59194		970	9.42463			970	10.0104		970	9.55685
		971	9.77684		971	9.62729		971	9.51278			971	9.97403		971	9.52113
		972	9.75472		972	9.66659		972	9.58841			972	9.94494		972	9.5149
		973	9.73943		973	9.69936		973	9.6422			973	9.92474		973	9.52625
		974	9.73062		974	9.72298		974	9.67722			974	9.91145		974	9.54465
		975	9.72538		975	9.74087		975	9.69878			975	9.90143		975	9.56467
		976	9.7229		976	9.75471		976	9.71234			976	9.89526		976	9.58302
		977	9.72172		977	9.76484		977	9.72232			977	9.89251		977	9.60094
		978	9.72063		978	9.77333		978	9.73054			978	9.89062		978	9.61734
		979	9.71973		979	9.7805		979	9.7373			979	9.88823		979	9.63205
		980	9.71931		980	9.78627		980	9.74252			980	9.88754		980	9.6453
		981	9.71924		981	9.79151		981	9.74795			981	9.88635		981	9.65862
		982	9.71904		982	9.79735		982	9.75132			982	9.88359		982	9.67115
		983	9.71916		983	9.80244		983	9.75402			983	9.88192		983	9.68241
		984	9.71974		984	9.80746		984	9.75701			984	9.88076		984	9.69337
		985	9.71894		985	9.81111		985	9.75868			985	9.87902		985	9.70351
		986	9.71874		986	9.81431		986	9.76187			986	9.87696		986	9.71134
		987	9.71733		987	9.81704		987	9.76515			987	9.8761		987	9.71807
		988	9.71608		988	9.81972		988	9.76731			988	9.87417		988	9.72496
		989	9.7158		989	9.82088		989	9.76837			989	9.87242		989	9.73192
		990	9.71497		990	9.82267		990	9.77032			990	9.87231		990	9.73883
		991	9.71469		991	9.82487		991	9.7709			991	9.87229		991	9.74652
		992	9.7154		992	9.82493		992	9.77338			992	9.87078		992	9.75357
		993	9.71531		993	9.82509		993	9.7757			993	9.87058		993	9.75961
		994	9.71324		994	9.82614		994	9.77917			994	9.87051		994	9.76503
		995	9.71336		995	9.82744		995	9.78174			995	9.86967		995	9.77023
		996	9.71357		996	9.82739		996	9.78382			996	9.86917		996	9.77618
		997	9.7138		997	9.82838		997	9.78461			997	9.86935		997	9.78174
		998	9.71526		998	9.83027		998	9.78624			998	9.86913		998	9.78691
		999	9.71607		999	9.83126		999	9.78618			999	9.86858		999	9.7923
		1000	9.71629		1000	9.83257		1000	9.78723			1000	9.86809		1000	9.79744
		1001	9.71542		1001	9.83458		1001	9.78767			1001	9.86782		1001	9.80089
		1002	9.71412		1002	9.8368		1002	9.78789			1002	9.8693		1002	9.80399
		1003	9.71216		1003	9.83621		1003	9.78824			1003	9.86989		1003	9.8069
		1004	9.71134		1004	9.83655		1004	9.78944			1004	9.86997		1004	9.80925
		1005	9.71112		1005	9.83548		1005	9.78939			1005	9.86988		1005	9.81144
		1006	9.71121		1006	9.83537		1006	9.78876			1006	9.86959		1006	9.81445
		1007	9.7121		1007	9.83559		1007	9.78766			1007	9.86838		1007	9.81652
		1008	9.71294		1008	9.83778		1008	9.78656			1008	9.86867		1008	9.81898
		1009	9.71346		1009	9.83854		1009	9.78647			1009	9.86918		1009	9.82064
		1010	9.71384		1010	9.83972		1010	9.7879			1010	9.86978		1010	9.82182
		1011	9.71492		1011	9.8401		1011	9.78912			1011	9.8708		1011	9.82165
		1012	9.71509		1012	9.83934		1012	9.78979			1012	9.87182		1012	9.82233
		1013	9.71517		1013	9.83894		1013	9.78991			1013	9.87172		1013	9.82402
		1014	9.7154		1014	9.83994		1014	9.78859			1014	9.8716		1014	9.8268
		1015	9.71574		1015	9.84063		1015	9.78828			1015	9.87061		1015	9.8283
		1016	9.71598		1016	9.84113		1016	9.78984			1016	9.86951		1016	9.82969
		1017	9.71599		1017	9.8421		1017	9.79123			1017	9.86847		1017	9.83088
		1018	9.71648		1018	9.84186		1018	9.7919			1018	9.86835		1018	9.83128
		1019	9.71652		1019	9.84112		1019	9.79219			1019	9.86787		1019	9.83106
		1020	9.71602		1020	9.84027		1020	9.79169			1020	9.86815		1020	9.83171
		1021	9.71545		1021	9.83992		1021	9.78992			1021	9.86973		1021	9.8336
		1022	9.71535		1022	9.83828		1022	9.78855			1022	9.87124		1022	9.83395
		1023	9.7151		1023	9.83922		1023	9.78818			1023	9.87089		1023	9.83412
		1024	9.71545		1024	9.84031		1024	9.78913			1024	9.87072		1024	9.83399
		1025	9.71567		1025	9.84124		1025	9.78961			1025	9.87032		1025	9.83448
		1026	9.71565		1026	9.84111		1026	9.79045			1026	9.86933		1026	9.83512
		1027	9.71467		1027	9.84256		1027	9.79133			1027	9.86746		1027	9.83664
		1028	9.71363		1028	9.84217		1028	9.7913			1028	9.8676		1028	9.8374
		1029	9.71358		1029	9.84243		1029	9.79084			1029	9.86832		1029	9.83854
		1030	9.71383		1030	9.84213		1030	9.79103			1030	9.86853		1030	9.83941
		1031	9.715		1031	9.84268		1031	9.79063			1031	9.86846		1031	9.83937
		1032	9.71608		1032	9.84331		1032	9.79015			1032	9.86934		1032	9.84043
		1033	9.71762		1033	9.84295		1033	9.79101			1033	9.86985		1033	9.84154
		1034	9.71815		1034	9.84239		1034	9.79101			1034	9.86938		1034	9.8431
		1035	9.71843		1035	9.84282		1035	9.79064			1035	9.86991		1035	9.84353
		1036	9.71763		1036	9.84241		1036	9.79049			1036	9.86931		1036	9.84309
		1037	9.71647		1037	9.84054		1037	9.79119			1037	9.87007		1037	9.84215
		1038	9.7157		1038	9.84097		1038	9.79074			1038	9.8687		1038	9.84167
		1039	9.71505		1039	9.8413		1039	9.79268			1039	9.86863		1039	9.84105
		1040	9.71437		1040	9.84169		1040	9.79401			1040	9.8681		1040	9.84074
		1041	9.71425		1041	9.84213		1041	9.79678			1041	9.8692		1041	9.84094
		1042	9.71586		1042	9.84363		1042	9.79742			1042	9.8682		1042	9.84111
		1043	9.71707		1043	9.84401		1043	9.79777			1043	9.8677		1043	9.84072
		1044	9.71741		1044	9.84436		1044	9.79595			1044	9.86724		1044	9.84114
		1045	9.71759		1045	9.84413		1045	9.79349			1045	9.86775		1045	9.84225
		1046	9.71798		1046	9.84415		1046	9.79001			1046	9.86785		1046	9.84327
		1047	9.71729		1047	9.8437		1047	9.78878			1047	9.86832		1047	9.8434
		1048	9.71652		1048	9.84326		1048	9.78757			1048	9.86942		1048	9.84521
		1049	9.71716		1049	9.84212		1049	9.7872			1049	9.86994		1049	9.84583
		1050	9.71735		1050	9.84216		1050	9.78874			1050	9.86986		1050	9.84633
		1051	9.71625		1051	9.84291		1051	9.78979			1051	9.8695		1051	9.84598
		1052	9.71614		1052	9.84378		1052	9.79039			1052	9.8698		1052	9.84644
		1053	9.716		1053	9.84359		1053	9.79282			1053	9.87043		1053	9.84572
		1054	9.71546		1054	9.8436		1054	9.79337			1054	9.87043		1054	9.84547
		1055	9.71661		1055	9.84339		1055	9.7942			1055	9.87		1055	9.84473
		1056	9.71798		1056	9.84221		1056	9.79681			1056	9.87036		1056	9.84555
		1057	9.71817		1057	9.84203		1057	9.79671			1057	9.87049		1057	9.84607
		1058	9.71832		1058	9.84331		1058	9.79636			1058	9.87097		1058	9.84629
		1059	9.71828		1059	9.84427		1059	9.79618			1059	9.87149		1059	9.846
		1060	9.71689		1060	9.84445		1060	9.79527			1060	9.87234		1060	9.84627
		1061	9.71557		1061	9.84583		1061	9.79328			1061	9.87181		1061	9.84594
		1062	9.71596		1062	9.84476		1062	9.79265			1062	9.87127		1062	9.84556
		1063	9.71589		1063	9.84351		1063	9.79141			1063	9.87087		1063	9.84609
		1064	9.71615		1064	9.84328		1064	9.79045			1064	9.8717		1064	9.84656
		1065	9.71726		1065	9.84265		1065	9.78957			1065	9.87108		1065	9.8469
		1066	9.71783		1066	9.84146		1066	9.7888			1066	9.87094		1066	9.84757
		1067	9.71733		1067	9.84169		1067	9.78953			1067	9.87094		1067	9.84764
		1068	9.71828		1068	9.84215		1068	9.78982			1068	9.87168		1068	9.84766
		1069	9.71826		1069	9.84106		1069	9.79005			1069	9.87149		1069	9.84748
		1070	9.71822		1070	9.84136		1070	9.79175			1070	9.87285		1070	9.84722
		1071	9.71832		1071	9.84214		1071	9.79237			1071	9.87487		1071	9.84687
		1072	9.71817		1072	9.84299		1072	9.7919			1072	9.87536		1072	9.84736
		1073	9.71686		1073	9.84331		1073	9.79169			1073	9.87493		1073	9.84791
		1074	9.71626		1074	9.84448		1074	9.79253			1074	9.87424		1074	9.84897
		1075	9.7153		1075	9.84565		1075	9.79227			1075	9.87319		1075	9.84981
		1076	9.71509		1076	9.84561		1076	9.79243			1076	9.87266		1076	9.8492
		1077	9.71582		1077	9.84589		1077	9.79443			1077	9.87285		1077	9.8488
		1078	9.71575		1078	9.84626		1078	9.79588			1078	9.87283		1078	9.84834
		1079	9.71529		1079	9.84708		1079	9.79541			1079	9.874		1079	9.847
		1080	9.71491		1080	9.84592		1080	9.7936			1080	9.87396		1080	9.84603
		1081	9.71446		1081	9.84624		1081	9.79239			1081	9.87306		1081	9.84615
		1082	9.71371		1082	9.84685		1082	9.79035			1082	9.87199		1082	9.84609
		1083	9.71381		1083	9.84674		1083	9.78876			1083	9.87059		1083	9.84657
		1084	9.71444		1084	9.84577		1084	9.78897			1084	9.87003		1084	9.84728
		1085	9.71468		1085	9.84606		1085	9.78987			1085	9.87038		1085	9.84813
		1086	9.7154		1086	9.84548		1086	9.79056			1086	9.87025		1086	9.84878
		1087	9.71567		1087	9.8443		1087	9.79043			1087	9.87055		1087	9.84981
		1088	9.71586		1088	9.84395		1088	9.79083			1088	9.87184		1088	9.84999
		1089	9.71534		1089	9.84492		1089	9.79087			1089	9.87141		1089	9.85011
		1090	9.71463		1090	9.84528		1090	9.79129			1090	9.87161		1090	9.84988
		1091	9.71302		1091	9.84591		1091	9.79167			1091	9.87121		1091	9.85
		1092	9.71213		1092	9.84615		1092	9.79184			1092	9.87248		1092	9.84891
		1093	9.71135		1093	9.84668		1093	9.79215			1093	9.87223		1093	9.84896
		1094	9.71205		1094	9.84696		1094	9.79285			1094	9.87254		1094	9.84874
		1095	9.71348		1095	9.84695		1095	9.79288			1095	9.87287		1095	9.84845
		1096	9.71527		1096	9.8465		1096	9.79283			1096	9.87387		1096	9.84916
		1097	9.71569		1097	9.84634		1097	9.79291			1097	9.87364		1097	9.8497
		1098	9.71603		1098	9.84514		1098	9.79244			1098	9.87421		1098	9.84961
		1099	9.71547		1099	9.84419		1099	9.79227			1099	9.87426		1099	9.84954
		1100	9.71532		1100	9.84474		1100	9.79249			1100	9.87373		1100	9.85072
		1101	9.71586		1101	9.84579		1101	9.79248			1101	9.87364		1101	9.85047
		1102	9.71712		1102	9.847		1102	9.79264			1102	9.8726		1102	9.85054
		1103	9.71833		1103	9.84871		1103	9.79345			1103	9.87229		1103	9.85002
		1104	9.71925		1104	9.84886		1104	9.79358			1104	9.87313		1104	9.85064
		1105	9.71926		1105	9.84859		1105	9.79349			1105	9.87395		1105	9.85081
		1106	9.71886		1106	9.84748		1106	9.79384			1106	9.87457		1106	9.85124
		1107	9.71935		1107	9.84685		1107	9.79402			1107	9.87617		1107	9.85156
		1108	9.719		1108	9.84647		1108	9.79371			1108	9.87679		1108	9.8521
		1109	9.71856		1109	9.84721		1109	9.79379			1109	9.87696		1109	9.85207
		1110	9.71861		1110	9.8471		1110	9.79308			1110	9.87696		1110	9.85179
		1111	9.71826		1111	9.84752		1111	9.7934			1111	9.87607		1111	9.85192
		1112	9.71811		1112	9.848		1112	9.79263			1112	9.87492		1112	9.85258
		1113	9.71838		1113	9.84737		1113	9.79272			1113	9.87534		1113	9.853
		1114	9.71903		1114	9.84613		1114	9.79334			1114	9.8754		1114	9.8528
		1115	9.71828		1115	9.84563		1115	9.79425			1115	9.87553		1115	9.85211
		1116	9.71726		1116	9.84536		1116	9.7937			1116	9.87605		1116	9.85114
		1117	9.71567		1117	9.84509		1117	9.79391			1117	9.87667		1117	9.8502
		1118	9.71558		1118	9.84439		1118	9.79271			1118	9.87549		1118	9.85033
		1119	9.71586		1119	9.84526		1119	9.7919			1119	9.8748		1119	9.85098
		1120	9.71768		1120	9.8452		1120	9.7914			1120	9.874		1120	9.85066
		1121	9.71909		1121	9.84534		1121	9.7919			1121	9.87374		1121	9.85118
		1122	9.71983		1122	9.84563		1122	9.79271			1122	9.87326		1122	9.85228
		1123	9.71936		1123	9.84666		1123	9.79391			1123	9.87396		1123	9.85156
		1124	9.71912		1124	9.84668		1124	9.79377			1124	9.87348		1124	9.85119
		1125	9.71905		1125	9.84713		1125	9.79496			1125	9.87369		1125	9.85167
		1126	9.71906		1126	9.84637		1126	9.7952			1126	9.8738		1126	9.85066
		1127	9.71919		1127	9.84521		1127	9.7955			1127	9.87334		1127	9.84995
		1128	9.71885		1128	9.84493		1128	9.79475			1128	9.87265		1128	9.85056
		1129	9.71811		1129	9.84495		1129	9.79471			1129	9.87356		1129	9.85062
		1130	9.7175		1130	9.8458		1130	9.79359			1130	9.87477		1130	9.85081
		1131	9.71714		1131	9.84696		1131	9.79205			1131	9.87578		1131	9.85218
		1132	9.71737		1132	9.8481		1132	9.79198			1132	9.87683		1132	9.8525
		1133	9.71822		1133	9.84819		1133	9.79265			1133	9.87744		1133	9.8524
		1134	9.71849		1134	9.84797		1134	9.79386			1134	9.87723		1134	9.85167
		1135	9.71817		1135	9.84745		1135	9.79516			1135	9.87661		1135	9.85096
		1136	9.71796		1136	9.84745		1136	9.79568			1136	9.87635		1136	9.85139
		1137	9.71849		1137	9.84832		1137	9.79477			1137	9.87576		1137	9.85227
		1138	9.71799		1138	9.849		1138	9.79426			1138	9.87507		1138	9.85205
		1139	9.71885		1139	9.84933		1139	9.794			1139	9.87455		1139	9.85199
		1140	9.71873		1140	9.84952		1140	9.79297			1140	9.87412		1140	9.85238
		1141	9.71869		1141	9.84934		1141	9.79406			1141	9.87344		1141	9.85224
		1142	9.71861		1142	9.84881		1142	9.79392			1142	9.87387		1142	9.85201
		1143	9.73062		1143	9.84557		1143	9.77331			1143	9.8853		1143	9.86086
		1144	9.76372		1144	9.83016		1144	9.70793			1144	9.9162		1144	9.87847
		1145	9.8053		1145	9.79261		1145	9.60423			1145	9.96226		1145	9.89189
		1146	9.84018		1146	9.73668		1146	9.48763			1146	10.0096		1146	9.8849
		1147	9.86468		1147	9.67789		1147	9.38878			1147	10.0462		1147	9.85231
		1148	9.8712		1148	9.63056		1148	9.33414			1148	10.0625		1148	9.7964
		1149	9.84936		1149	9.60511		1149	9.3446			1149	10.0516		1149	9.72639
		1150	9.81536		1150	9.6111		1150	9.41089			1150	10.0199		1150	9.65945
		1151	9.78537		1151	9.6425		1151	9.49901			1151	9.98345		1151	9.61428
		1152	9.76313		1152	9.67915		1152	9.57599			1152	9.95471		1152	9.59831
		1153	9.74771		1153	9.71124		1153	9.63325			1153	9.93343		1153	9.60062
		1154	9.73866		1154	9.7359		1154	9.67156			1154	9.91841		1154	9.61136
		1155	9.73411		1155	9.75316		1155	9.6952			1155	9.9086		1155	9.62518
		1156	9.73221		1156	9.76525		1156	9.71088			1156	9.90208		1156	9.63947
		1157	9.73136		1157	9.77531		1157	9.72199			1157	9.89834		1157	9.65183
		1158	9.73084		1158	9.78351		1158	9.73079			1158	9.89609		1158	9.66397
		1159	9.72954		1159	9.79089		1159	9.73809			1159	9.89471		1159	9.67461
		1160	9.72816		1160	9.79773		1160	9.74404			1160	9.89317		1160	9.68564
		1161	9.72774		1161	9.80369		1161	9.74942			1161	9.89215		1161	9.69525
		1162	9.72837		1162	9.80933		1162	9.75477			1162	9.89116		1162	9.7046
		1163	9.72817		1163	9.81418		1163	9.7589			1163	9.89039		1163	9.71298
		1164	9.72812		1164	9.81824		1164	9.76316			1164	9.88977		1164	9.7217
		1165	9.72853		1165	9.82074		1165	9.76786			1165	9.88902		1165	9.72838
		1166	9.72745		1166	9.8224		1166	9.77299			1166	9.88792		1166	9.73438
		1167	9.7261		1167	9.82491		1167	9.7779			1167	9.88528		1167	9.74004
		1168	9.72515		1168	9.82669		1168	9.77994			1168	9.88252		1168	9.74527
		1169	9.72462		1169	9.82807		1169	9.78169			1169	9.87975		1169	9.75064
		1170	9.72325		1170	9.82992		1170	9.78241			1170	9.87896		1170	9.75613
		1171	9.72258		1171	9.83287		1171	9.7821			1171	9.87847		1171	9.76193
		1172	9.72108		1172	9.83407		1172	9.78222			1172	9.87889		1172	9.76869
		1173	9.71987		1173	9.83669		1173	9.7847			1173	9.87986		1173	9.77486
		1174	9.72077		1174	9.83854		1174	9.78684			1174	9.88062		1174	9.78045
		1175	9.72192		1175	9.83957		1175	9.78857			1175	9.8798		1175	9.78568
		1176	9.72318		1176	9.84009		1176	9.79022			1176	9.87882		1176	9.79035
		1177	9.72364		1177	9.84105		1177	9.78968			1177	9.87673		1177	9.7941
		1178	9.72442		1178	9.84158		1178	9.78978			1178	9.87517		1178	9.79833
		1179	9.72393		1179	9.84305		1179	9.7898			1179	9.87478		1179	9.80233
		1180	9.72408		1180	9.84555		1180	9.79067			1180	9.875		1180	9.80576
		1181	9.7234		1181	9.84766		1181	9.7915			1181	9.87512		1181	9.80965
		1182	9.72428		1182	9.84938		1182	9.79318			1182	9.87705		1182	9.8124
		1183	9.72433		1183	9.84958		1183	9.79383			1183	9.87824		1183	9.81413
		1184	9.72359		1184	9.84858		1184	9.79553			1184	9.87814		1184	9.81677
		1185	9.72228		1185	9.84828		1185	9.79593			1185	9.87787		1185	9.81945
		1186	9.72234		1186	9.84784		1186	9.79581			1186	9.87732		1186	9.82241
		1187	9.72251		1187	9.84775		1187	9.79666			1187	9.87654		1187	9.82508
		1188	9.7233		1188	9.84815		1188	9.79721			1188	9.87625		1188	9.82744
		1189	9.72275		1189	9.8496		1189	9.79674			1189	9.87663		1189	9.82896
		1190	9.72266		1190	9.84969		1190	9.79681			1190	9.87658		1190	9.83086
		1191	9.72314		1191	9.84925		1191	9.79684			1191	9.87687		1191	9.83042
		1192	9.7229		1192	9.84968		1192	9.79647			1192	9.8771		1192	9.83186
		1193	9.72207		1193	9.85024		1193	9.79732			1193	9.8766		1193	9.83306
		1194	9.72272		1194	9.84962		1194	9.79664			1194	9.87624		1194	9.83447
		1195	9.72321		1195	9.84935		1195	9.79625			1195	9.87648		1195	9.83531
		1196	9.72276		1196	9.85114		1196	9.79573			1196	9.8765		1196	9.83792
		1197	9.72251		1197	9.85205		1197	9.79449			1197	9.87615		1197	9.83914
		1198	9.72267		1198	9.85172		1198	9.79381			1198	9.87623		1198	9.84102
		1199	9.72192		1199	9.85257		1199	9.79492			1199	9.87514		1199	9.84119
		1200	9.72162		1200	9.85212		1200	9.79492			1200	9.87211		1200	9.84157
		1201	9.72167		1201	9.85055		1201	9.79432			1201	9.87154		1201	9.84151
		1202	9.72164		1202	9.8496		1202	9.79502			1202	9.87222		1202	9.8415
		1203	9.72291		1203	9.85019		1203	9.79559			1203	9.87329		1203	9.84205
		1204	9.72466		1204	9.85009		1204	9.79509			1204	9.87559		1204	9.8432
		1205	9.72555		1205	9.85096		1205	9.79594			1205	9.87913		1205	9.84423
		1206	9.72603		1206	9.85113		1206	9.79707			1206	9.88037		1206	9.84518
		1207	9.72581		1207	9.8506		1207	9.79804			1207	9.88032		1207	9.84649
		1208	9.72467		1208	9.84927		1208	9.79684			1208	9.88062		1208	9.84627
		1209	9.72402		1209	9.84969		1209	9.7959			1209	9.87967		1209	9.8462
		1210	9.72415		1210	9.85117		1210	9.79446			1210	9.87863		1210	9.84643
		1211	9.72373		1211	9.85254		1211	9.79524			1211	9.87786		1211	9.84714
		1212	9.7251		1212	9.85374		1212	9.79504			1212	9.87705		1212	9.84723
		1213	9.72558		1213	9.85529		1213	9.79588			1213	9.87625		1213	9.8476
		1214	9.7254		1214	9.85506		1214	9.79717			1214	9.8767		1214	9.84786
		1215	9.72532		1215	9.85407		1215	9.79873			1215	9.87685		1215	9.84791
		1216	9.72579		1216	9.85307		1216	9.79798			1216	9.87755		1216	9.84716
		1217	9.72576		1217	9.85281		1217	9.79637			1217	9.87912		1217	9.84636
		1218	9.72612		1218	9.85171		1218	9.79503			1218	9.87938		1218	9.84542
		1219	9.72685		1219	9.85074		1219	9.79351			1219	9.87987		1219	9.84504
		1220	9.72678		1220	9.85049		1220	9.79363			1220	9.88027		1220	9.84596
		1221	9.72638		1221	9.85139		1221	9.79409			1221	9.87991		1221	9.84673
		1222	9.72539		1222	9.85202		1222	9.79557			1222	9.87925		1222	9.84738
		1223	9.72549		1223	9.85289		1223	9.79688			1223	9.8787		1223	9.84804
		1224	9.72584		1224	9.85453		1224	9.79722			1224	9.87859		1224	9.85014
		1225	9.72568		1225	9.85518		1225	9.79708			1225	9.87806		1225	9.85051
		1226	9.72488		1226	9.85533		1226	9.79675			1226	9.87743		1226	9.85129
		1227	9.72491		1227	9.85446		1227	9.79638			1227	9.87785		1227	9.85166
		1228	9.72448		1228	9.85473		1228	9.79587			1228	9.87908		1228	9.85273
		1229	9.72369		1229	9.85412		1229	9.79702			1229	9.87939		1229	9.85208
		1230	9.72343		1230	9.8538		1230	9.79931			1230	9.8807		1230	9.85195
		1231	9.72421		1231	9.85306		1231	9.80142			1231	9.8815		1231	9.85125
		1232	9.72537		1232	9.85302		1232	9.80329			1232	9.8818		1232	9.85158
		1233	9.72523		1233	9.85259		1233	9.80459			1233	9.88108		1233	9.85139
		1234	9.72565		1234	9.85159		1234	9.80473			1234	9.88094		1234	9.85147
		1235	9.72698		1235	9.85163		1235	9.80203			1235	9.88046		1235	9.85163
		1236	9.72791		1236	9.85159		1236	9.80053			1236	9.88096		1236	9.85167
		1237	9.72904		1237	9.85235		1237	9.79997			1237	9.8807		1237	9.85132
		1238	9.72973		1238	9.85248		1238	9.79996			1238	9.87982		1238	9.85115
		1239	9.72913		1239	9.85306		1239	9.80101			1239	9.8798		1239	9.84976
		1240	9.72828		1240	9.8534		1240	9.8022			1240	9.88138		1240	9.84884
		1241	9.72872		1241	9.8538		1241	9.80225			1241	9.8814		1241	9.84901
		1242	9.72803		1242	9.85345		1242	9.80191			1242	9.88095		1242	9.84916
		1243	9.72847		1243	9.85348		1243	9.80141			1243	9.88183		1243	9.84989
		1244	9.72982		1244	9.85391		1244	9.80153			1244	9.8808		1244	9.85153
		1245	9.72962		1245	9.85318		1245	9.80153			1245	9.87863		1245	9.85328
		1246	9.72903		1246	9.85296		1246	9.8021			1246	9.87857		1246	9.85441
		1247	9.72794		1247	9.85295		1247	9.8029			1247	9.87853		1247	9.85542
		1248	9.72775		1248	9.85312		1248	9.80398			1248	9.87862		1248	9.85557
		1249	9.72741		1249	9.85395		1249	9.80276			1249	9.87904		1249	9.85527
		1250	9.7284		1250	9.85439		1250	9.80191			1250	9.8797		1250	9.85429
		1251	9.72841		1251	9.85463		1251	9.8006			1251	9.87884		1251	9.85451
		1252	9.72855		1252	9.85539		1252	9.79933			1252	9.87853		1252	9.85421
		1253	9.72844		1253	9.85637		1253	9.79907			1253	9.87765		1253	9.85471
		1254	9.72928		1254	9.85687		1254	9.80061			1254	9.87826		1254	9.85531
		1255	9.72902		1255	9.85768		1255	9.80158			1255	9.87749		1255	9.8555
		1256	9.72913		1256	9.85716		1256	9.80284			1256	9.87785		1256	9.8547
		1257	9.72894		1257	9.85612		1257	9.80265			1257	9.8782		1257	9.85391
		1258	9.72864		1258	9.85501		1258	9.80234			1258	9.87893		1258	9.85315
		1259	9.72785		1259	9.85433		1259	9.80287			1259	9.87847		1259	9.8527
		1260	9.72715		1260	9.85323		1260	9.80269			1260	9.88084		1260	9.85347
		1261	9.72613		1261	9.85349		1261	9.8025			1261	9.88212		1261	9.85412
		1262	9.72584		1262	9.8536		1262	9.80423			1262	9.88185		1262	9.85546
		1263	9.7258		1263	9.85279		1263	9.80363			1263	9.88133		1263	9.85569
		1264	9.72538		1264	9.85238		1264	9.80508			1264	9.88128		1264	9.85563
		1265	9.7261		1265	9.85394		1265	9.81611			1265	9.87972		1265	9.85516
		1266	9.7277		1266	9.85467		1266	9.83107			1266	9.87879		1266	9.85572
		1267	9.72813		1267	9.85467		1267	9.84486			1267	9.88016		1267	9.85557
		1268	9.72836		1268	9.85477		1268	9.85934			1268	9.88071		1268	9.85552
		1269	9.7295		1269	9.85504		1269	9.86638			1269	9.88062		1269	9.85582
		1270	9.72992		1270	9.85386		1270	9.86362			1270	9.87978		1270	9.85667
		1271	9.7287		1271	9.85259		1271	9.85854			1271	9.87943		1271	9.8563
		1272	9.72934		1272	9.85272		1272	9.85496			1272	9.87844		1272	9.85582
		1273	9.72931		1273	9.8531		1273	9.85035			1273	9.87837		1273	9.85606
		1274	9.72866		1274	9.85293		1274	9.84838			1274	9.8785		1274	9.85707
		1275	9.72831		1275	9.85337		1275	9.84315			1275	9.87967		1275	9.85636
		1276	9.72855		1276	9.85469		1276	9.83476			1276	9.87964		1276	9.85584
		1277	9.72808		1277	9.85526		1277	9.82597			1277	9.87924		1277	9.85604
		1278	9.7283		1278	9.85601		1278	9.81845			1278	9.87922		1278	9.85653
		1279	9.72723		1279	9.85629		1279	9.81409			1279	9.87946		1279	9.85649
		1280	9.72766		1280	9.85539		1280	9.81439			1280	9.87879		1280	9.85693
		1281	9.72758		1281	9.85543		1281	9.81764			1281	9.87825		1281	9.85714
		1282	9.72807		1282	9.8546		1282	9.81928			1282	9.87777		1282	9.85725
		1283	9.72836		1283	9.85368		1283	9.82025			1283	9.87762		1283	9.85676
		1284	9.73033		1284	9.85407		1284	9.81812			1284	9.87833		1284	9.85637
		1285	9.73036		1285	9.85486		1285	9.81591			1285	9.87874		1285	9.85672
		1286	9.73131		1286	9.85438		1286	9.81346			1286	9.87883		1286	9.85729
		1287	9.73147		1287	9.85422		1287	9.81128			1287	9.88032		1287	9.85786
		1288	9.73087		1288	9.85445		1288	9.81056			1288	9.88112		1288	9.85843
		1289	9.72974		1289	9.85363		1289	9.81105			1289	9.88086		1289	9.85773
		1290	9.7287		1290	9.85343		1290	9.81059			1290	9.88172		1290	9.85691
		1291	9.72859		1291	9.85456		1291	9.80924			1291	9.88295		1291	9.85604
		1292	9.72885		1292	9.85598		1292	9.80943			1292	9.88257		1292	9.85565
		1293	9.72944		1293	9.8573		1293	9.80842			1293	9.88249		1293	9.85547
		1294	9.72947		1294	9.85722		1294	9.80697			1294	9.88228		1294	9.85696
		1295	9.72999		1295	9.85694		1295	9.80654			1295	9.88186		1295	9.85784
		1296	9.73015		1296	9.85643		1296	9.80708			1296	9.88101		1296	9.85787
		1297	9.73038		1297	9.85584		1297	9.80694			1297	9.88066		1297	9.85744
		1298	9.7307		1298	9.85479		1298	9.80856			1298	9.88021		1298	9.85666
		1299	9.73115		1299	9.8551		1299	9.80915			1299	9.87992		1299	9.85579
		1300	9.73121		1300	9.85537		1300	9.80936			1300	9.87917		1300	9.85608
		1301	9.73162		1301	9.85568		1301	9.80857			1301	9.87957		1301	9.85678
		1302	9.73131		1302	9.85582		1302	9.80853			1302	9.87994		1302	9.85741
		1303	9.73127		1303	9.85701		1303	9.80707			1303	9.88119		1303	9.85926
		1304	9.73167		1304	9.85734		1304	9.80731			1304	9.88176		1304	9.8594
		1305	9.73198		1305	9.85841		1305	9.80841			1305	9.88226		1305	9.85906
		1306	9.73166		1306	9.85802		1306	9.80948			1306	9.88221		1306	9.85938
		1307	9.73153		1307	9.85849		1307	9.80846			1307	9.88219		1307	9.85996
		1308	9.7314		1308	9.85726		1308	9.80839			1308	9.88127		1308	9.85966
		1309	9.73176		1309	9.85748		1309	9.80812			1309	9.88136		1309	9.86024
		1310	9.73217		1310	9.85704		1310	9.80796			1310	9.88099		1310	9.86064
		1311	9.73161		1311	9.85666		1311	9.80873			1311	9.88209		1311	9.861
		1312	9.73142		1312	9.85654		1312	9.80958			1312	9.88272		1312	9.86025
		1313	9.73082		1313	9.85728		1313	9.81069			1313	9.88243		1313	9.85961
		1314	9.72987		1314	9.8577		1314	9.81114			1314	9.88162		1314	9.85971
		1315	9.72988		1315	9.85658		1315	9.81041			1315	9.88177		1315	9.85947
		1316	9.73095		1316	9.85717		1316	9.80885			1316	9.87991		1316	9.85908
		1317	9.73118		1317	9.85757		1317	9.81044			1317	9.87878		1317	9.85943
		1318	9.73163		1318	9.85801		1318	9.81353			1318	9.87783		1318	9.86082
		1319	9.7321		1319	9.8577		1319	9.81734			1319	9.87752		1319	9.86118
		1320	9.73196		1320	9.85822		1320	9.82108			1320	9.87724		1320	9.86146
		1321	9.73125		1321	9.85881		1321	9.82301			1321	9.8779		1321	9.8615
		1322	9.73216		1322	9.85873		1322	9.82132			1322	9.87862		1322	9.86187
		1323	9.74418		1323	9.85557		1323	9.79927			1323	9.89002		1323	9.86987
		1324	9.7762		1324	9.84198		1324	9.73652			1324	9.91968		1324	9.8909
		1325	9.81553		1325	9.8093		1325	9.63712			1325	9.9644		1325	9.91338
		1326	9.84911		1326	9.75825		1326	9.5239			1326	10.0118		1326	9.91882
		1327	9.87344		1327	9.70416		1327	9.42363			1327	10.0483		1327	9.9015
		1328	9.87804		1328	9.65927		1328	9.36568			1328	10.0645		1328	9.86178
		1329	9.8562		1329	9.6345		1329	9.37076			1329	10.0555		1329	9.80228
		1330	9.82349		1330	9.63657		1330	9.42804			1330	10.0255		1330	9.74111
		1331	9.79409		1331	9.66273		1331	9.51103			1331	9.9892		1331	9.69814
		1332	9.77501		1332	9.69632		1332	9.58824			1332	9.95999		1332	9.67999
		1333	9.76509		1333	9.72649		1333	9.64562			1333	9.93906		1333	9.67704
		1334	9.76295		1334	9.74881		1334	9.68291			1334	9.92403		1334	9.68362
		1335	9.76375		1335	9.76575		1335	9.7081			1335	9.91438		1335	9.6913
		1336	9.7665		1336	9.77679		1336	9.7247			1336	9.9073		1336	9.70023
		1337	9.76718		1337	9.78525		1337	9.73599			1337	9.90416		1337	9.70879
		1338	9.76677		1338	9.79331		1338	9.74578			1338	9.90327		1338	9.71784
		1339	9.76382		1339	9.80067		1339	9.7531			1339	9.90153		1339	9.72586
		1340	9.76128		1340	9.80651		1340	9.75903			1340	9.89966		1340	9.73468
		1341	9.75838		1341	9.81119		1341	9.76579			1341	9.89838		1341	9.74194
		1342	9.75533		1342	9.81566		1342	9.77319			1342	9.89755		1342	9.7482
		1343	9.75195		1343	9.81907		1343	9.77706			1343	9.89645		1343	9.75404
		1344	9.74989		1344	9.82342		1344	9.78121			1344	9.89557		1344	9.75948
		1345	9.74673		1345	9.82689		1345	9.78473			1345	9.89421		1345	9.76389
		1346	9.74513		1346	9.83027		1346	9.78605			1346	9.89279		1346	9.76852
		1347	9.74397		1347	9.83242		1347	9.78857			1347	9.89066		1347	9.77292
		1348	9.74332		1348	9.83338		1348	9.79077			1348	9.88744		1348	9.77719
		1349	9.74205		1349	9.83393		1349	9.7933			1349	9.88486		1349	9.78152
		1350	9.74213		1350	9.83519		1350	9.79473			1350	9.88433		1350	9.78665
		1351	9.74161		1351	9.83893		1351	9.79539			1351	9.88432		1351	9.79108
		1352	9.74094		1352	9.84242		1352	9.79519			1352	9.88436		1352	9.79582
		1353	9.74113		1353	9.8454		1353	9.79574			1353	9.88551		1353	9.79931
		1354	9.74065		1354	9.84702		1354	9.79712			1354	9.88581		1354	9.80321
		1355	9.73971		1355	9.8478		1355	9.7987			1355	9.88522		1355	9.80502
		1356	9.73971		1356	9.84688		1356	9.80176			1356	9.88406		1356	9.80872
		1357	9.73992		1357	9.84691		1357	9.8028			1357	9.88279		1357	9.8114
		1358	9.73961		1358	9.84755		1358	9.8048			1358	9.88161		1358	9.81402
		1359	9.73991		1359	9.84833		1359	9.80508			1359	9.88166		1359	9.81614
		1360	9.74099		1360	9.85113		1360	9.80572			1360	9.88203		1360	9.81964
		1361	9.74004		1361	9.85293		1361	9.80557			1361	9.8825		1361	9.82194
		1362	9.73964		1362	9.8539		1362	9.8071			1362	9.88339		1362	9.82518
		1363	9.73904		1363	9.85541		1363	9.80685			1363	9.88399		1363	9.8284
		1364	9.73844		1364	9.85537		1364	9.80804			1364	9.88389		1364	9.83108
		1365	9.73777		1365	9.85442		1365	9.81071			1365	9.88302		1365	9.83378
		1366	9.73874		1366	9.8545		1366	9.81325			1366	9.88249		1366	9.83614
		1367	9.73874		1367	9.85539		1367	9.81151			1367	9.88226		1367	9.83836
		1368	9.73879		1368	9.8557		1368	9.81194			1368	9.88172		1368	9.84006
		1369	9.73908		1369	9.85661		1369	9.81089			1369	9.8826		1369	9.8412
		1370	9.73897		1370	9.85742		1370	9.80914			1370	9.88367		1370	9.84147
		1371	9.73822		1371	9.85701		1371	9.80713			1371	9.88355		1371	9.84255
		1372	9.73794		1372	9.85555		1372	9.80776			1372	9.88248		1372	9.84274
		1373	9.73763		1373	9.85494		1373	9.80867			1373	9.88326		1373	9.84315
		1374	9.73742		1374	9.85586		1374	9.81087			1374	9.8826		1374	9.84367
		1375	9.73803		1375	9.85647		1375	9.81143			1375	9.88165		1375	9.84516
		1376	9.73832		1376	9.85643		1376	9.81374			1376	9.88288		1376	9.84556
		1377	9.7382		1377	9.85732		1377	9.81663			1377	9.88453		1377	9.84661
		1378	9.73842		1378	9.85779		1378	9.81827			1378	9.88488		1378	9.8476
		1379	9.73944		1379	9.85753		1379	9.81897			1379	9.88566		1379	9.84769
		1380	9.73914		1380	9.85701		1380	9.8184			1380	9.88691		1380	9.84787
		1381	9.73865		1381	9.85798		1381	9.81685			1381	9.88657		1381	9.84838
		1382	9.73842		1382	9.85861		1382	9.81555			1382	9.88531		1382	9.84832
		1383	9.73809		1383	9.85892		1383	9.81607			1383	9.88417		1383	9.84875
		1384	9.73808		1384	9.85917		1384	9.81582			1384	9.88345		1384	9.85033
		1385	9.73845		1385	9.85909		1385	9.81734			1385	9.88233		1385	9.85094
		1386	9.73944		1386	9.85807		1386	9.81811			1386	9.88196		1386	9.85092
		1387	9.73963		1387	9.85673		1387	9.81846			1387	9.88246		1387	9.85166
		1388	9.73987		1388	9.85642		1388	9.81605			1388	9.88326		1388	9.85188
		1389	9.7396		1389	9.85643		1389	9.81628			1389	9.88385		1389	9.85226
		1390	9.73864		1390	9.85675		1390	9.81666			1390	9.8844		1390	9.85295
		1391	9.73802		1391	9.85688		1391	9.81722			1391	9.88458		1391	9.85379
		1392	9.73886		1392	9.85791		1392	9.81795			1392	9.88429		1392	9.85405
		1393	9.73905		1393	9.85787		1393	9.81906			1393	9.88386		1393	9.85463
		1394	9.7386		1394	9.8574		1394	9.81763			1394	9.88418		1394	9.85523
		1395	9.73928		1395	9.85739		1395	9.81693			1395	9.88426		1395	9.85541
		1396	9.73914		1396	9.8572		1396	9.81638			1396	9.88432		1396	9.85569
		1397	9.73906		1397	9.85713		1397	9.81479			1397	9.88515		1397	9.85622
		1398	9.73943		1398	9.85671		1398	9.81364			1398	9.88456		1398	9.85729
		1399	9.7401		1399	9.85739		1399	9.81307			1399	9.8836		1399	9.85737
		1400	9.74117		1400	9.85787		1400	9.81126			1400	9.88322		1400	9.85801
		1401	9.74214		1401	9.8594		1401	9.81115			1401	9.88282		1401	9.85882
		1402	9.74213		1402	9.85984		1402	9.81247			1402	9.88258		1402	9.85896
		1403	9.74121		1403	9.86049		1403	9.81392			1403	9.88317		1403	9.85916
		1404	9.74005		1404	9.85966		1404	9.81418			1404	9.88344		1404	9.85892
		1405	9.73893		1405	9.85921		1405	9.81518			1405	9.88269		1405	9.8586
		1406	9.73827		1406	9.85896		1406	9.81412			1406	9.88265		1406	9.8597
		1407	9.73827		1407	9.85863		1407	9.81335			1407	9.88338		1407	9.86031
		1408	9.73931		1408	9.85829		1408	9.81329			1408	9.88358		1408	9.85999
		1409	9.7398		1409	9.85899		1409	9.81529			1409	9.88311		1409	9.86126
		1410	9.73961		1410	9.85861		1410	9.81636			1410	9.8838		1410	9.86191
		1411	9.7398		1411	9.85818		1411	9.81759			1411	9.88372		1411	9.8613
		1412	9.73984		1412	9.85819		1412	9.81679			1412	9.88294		1412	9.86096
		1413	9.74028		1413	9.8581		1413	9.81334			1413	9.8825		1413	9.8605
		1414	9.7411		1414	9.8582		1414	9.80951			1414	9.884		1414	9.85983
		1415	9.74216		1415	9.85823		1415	9.80699			1415	9.88502		1415	9.8598
		1416	9.74267		1416	9.85855		1416	9.80412			1416	9.8864		1416	9.85891
		1417	9.74171		1417	9.8589		1417	9.80345			1417	9.88578		1417	9.85877
		1418	9.74165		1418	9.85993		1418	9.80719			1418	9.88569		1418	9.8594
		1419	9.74173		1419	9.8598		1419	9.81189			1419	9.88418		1419	9.85939
		1420	9.74029		1420	9.85965		1420	9.81553			1420	9.88332		1420	9.85965
		1421	9.73977		1421	9.85888		1421	9.82085			1421	9.88198		1421	9.85969
		1422	9.74081		1422	9.85805		1422	9.82495			1422	9.88203		1422	9.85944
		1423	9.74161		1423	9.8571		1423	9.82486			1423	9.88174		1423	9.85886
		1424	9.74165		1424	9.85682		1424	9.82387			1424	9.88147		1424	9.8601
		1425	9.74334		1425	9.85766		1425	9.82317			1425	9.88135		1425	9.86003
		1426	9.74406		1426	9.85823		1426	9.82164			1426	9.88189		1426	9.86035
		1427	9.74438		1427	9.85791		1427	9.81954			1427	9.88239		1427	9.86075
		1428	9.74284		1428	9.85808		1428	9.82019			1428	9.88367		1428	9.86037
		1429	9.74239		1429	9.85771		1429	9.8208			1429	9.88473		1429	9.85863
		1430	9.74105		1430	9.85762		1430	9.82184			1430	9.88498		1430	9.85908
		1431	9.74033		1431	9.85787		1431	9.82264			1431	9.88568		1431	9.8593
		1432	9.73942		1432	9.85905		1432	9.82381			1432	9.88611		1432	9.86006
		1433	9.74046		1433	9.85874		1433	9.82311			1433	9.88491		1433	9.86099
		1434	9.74038		1434	9.85891		1434	9.82306			1434	9.88487		1434	9.86123
		1435	9.74021		1435	9.85831		1435	9.82253			1435	9.88541		1435	9.86002
		1436	9.74113		1436	9.85699		1436	9.82185			1436	9.88558		1436	9.85997
		1437	9.74291		1437	9.85638		1437	9.82144			1437	9.88545		1437	9.8595
		1438	9.74253		1438	9.85697		1438	9.82079			1438	9.88598		1438	9.8587
		1439	9.74352		1439	9.85732		1439	9.82022			1439	9.88608		1439	9.8592
		1440	9.74473		1440	9.85763		1440	9.82081			1440	9.88573		1440	9.8598
		1441	9.74437		1441	9.85891		1441	9.8217			1441	9.88426		1441	9.86025
		1442	9.74363		1442	9.85952		1442	9.82114			1442	9.88359		1442	9.86076
		1443	9.7437		1443	9.86016		1443	9.82203			1443	9.88358		1443	9.86172
		1444	9.74256		1444	9.86074		1444	9.82195			1444	9.8834		1444	9.8617
		1445	9.74256		1445	9.86175		1445	9.82134			1445	9.8826		1445	9.86258
		1446	9.74326		1446	9.8623		1446	9.82077			1446	9.8836		1446	9.86198
		1447	9.74307		1447	9.86178		1447	9.82212			1447	9.88348		1447	9.86155
		1448	9.74376		1448	9.8612		1448	9.82209			1448	9.88351		1448	9.86114
		1449	9.74449		1449	9.86061		1449	9.82231			1449	9.88389		1449	9.86151
		1450	9.74476		1450	9.85932		1450	9.82162			1450	9.88518		1450	9.8613
		1451	9.74418		1451	9.85813		1451	9.82131			1451	9.88483		1451	9.86248
		1452	9.74444		1452	9.85824		1452	9.82051			1452	9.88561		1452	9.86264
		1453	9.74384		1453	9.85871		1453	9.82087			1453	9.88562		1453	9.86264
		1454	9.7434		1454	9.85843		1454	9.82145			1454	9.88571		1454	9.86206
		1455	9.74334		1455	9.85886		1455	9.82141			1455	9.88505		1455	9.86175
		1456	9.7447		1456	9.86022		1456	9.82082			1456	9.88491		1456	9.86115
		1457	9.74551		1457	9.85926		1457	9.8209			1457	9.88435		1457	9.86116
		1458	9.746		1458	9.85989		1458	9.82029			1458	9.88423		1458	9.86145
		1459	9.74641		1459	9.86076		1459	9.81869			1459	9.88317		1459	9.86153
		1460	9.74639		1460	9.86078		1460	9.81792			1460	9.88325		1460	9.86155
		1461	9.74579		1461	9.85962		1461	9.81767			1461	9.88382		1461	9.86145
		1462	9.74595		1462	9.86084		1462	9.81639			1462	9.88475		1462	9.86114
		1463	9.74606		1463	9.86028		1463	9.81616			1463	9.88605		1463	9.86183
		1464	9.74665		1464	9.85924		1464	9.81549			1464	9.88679		1464	9.863
		1465	9.74645		1465	9.85957		1465	9.81519			1465	9.88673		1465	9.86366
		1466	9.74579		1466	9.861		1466	9.81488			1466	9.88614		1466	9.86473
		1467	9.74591		1467	9.86095		1467	9.81504			1467	9.88632		1467	9.86514
		1468	9.7458		1468	9.86042		1468	9.81557			1468	9.88627		1468	9.86488
		1469	9.74561		1469	9.86122		1469	9.81681			1469	9.88652		1469	9.86392
		1470	9.74594		1470	9.86037		1470	9.81624			1470	9.8858		1470	9.86341
		1471	9.74612		1471	9.85891		1471	9.81547			1471	9.88572		1471	9.86302
		1472	9.74473		1472	9.85912		1472	9.81557			1472	9.88489		1472	9.86379
		1473	9.74487		1473	9.85901		1473	9.81577			1473	9.88443		1473	9.86406
		1474	9.74562		1474	9.85797		1474	9.81529			1474	9.88445		1474	9.86441
		1475	9.74567		1475	9.85884		1475	9.81717			1475	9.88582		1475	9.86491
		1476	9.74567		1476	9.86033		1476	9.81732			1476	9.88591		1476	9.8647
		1477	9.74664		1477	9.86045		1477	9.81691			1477	9.88637		1477	9.86408
		1478	9.74599		1478	9.86059		1478	9.8155			1478	9.88575		1478	9.86351
		1479	9.7451		1479	9.86167		1479	9.81507			1479	9.88494		1479	9.86421
		1480	9.7446		1480	9.86176		1480	9.81389			1480	9.88409		1480	9.86494
		1481	9.74535		1481	9.86127		1481	9.81576			1481	9.88527		1481	9.86565
		1482	9.7457		1482	9.8607		1482	9.81775			1482	9.88554		1482	9.86573
		1483	9.74598		1483	9.85991		1483	9.81857			1483	9.88565		1483	9.86609
		1484	9.74624		1484	9.85979		1484	9.81969			1484	9.88665		1484	9.86582
		1485	9.74676		1485	9.85885		1485	9.81945			1485	9.88783		1485	9.8657
		1486	9.74682		1486	9.85845		1486	9.81738			1486	9.88763		1486	9.86532
		1487	9.74607		1487	9.8592		1487	9.81502			1487	9.88689		1487	9.86589
		1488	9.74619		1488	9.85949		1488	9.8153			1488	9.88543		1488	9.86617
		1489	9.74589		1489	9.8587		1489	9.81369			1489	9.88415		1489	9.86705
		1490	9.74606		1490	9.85949		1490	9.81424			1490	9.88336		1490	9.867
		1491	9.74648		1491	9.86031		1491	9.81561			1491	9.88273		1491	9.86679
		1492	9.74653		1492	9.86057		1492	9.81725			1492	9.88284		1492	9.86656
		1493	9.74618		1493	9.86149		1493	9.81706			1493	9.88525		1493	9.86671
		1494	9.746		1494	9.86191		1494	9.81768			1494	9.88789		1494	9.86484
		1495	9.74603		1495	9.86211		1495	9.81845			1495	9.88916		1495	9.86406
		1496	9.74618		1496	9.86108		1496	9.81797			1496	9.88951		1496	9.86421
		1497	9.74694		1497	9.86058		1497	9.81653			1497	9.88979		1497	9.86477
		1498	9.74797		1498	9.86055		1498	9.81544			1498	9.88839		1498	9.8648
		1499	9.74975		1499	9.86096		1499	9.81615			1499	9.88686		1499	9.86542
		1500	9.75031		1500	9.86132		1500	9.81608			1500	9.88556		1500	9.86561
		1501	9.75014		1501	9.86154		1501	9.81737			1501	9.88468		1501	9.86623
		1502	9.74964		1502	9.8617		1502	9.81803			1502	9.88375		1502	9.86621
		1503	9.75706		1503	9.86142		1503	9.807			1503	9.89192		1503	9.87512
		1504	9.78372		1504	9.85229		1504	9.76108			1504	9.91846		1504	9.90003
		1505	9.82135		1505	9.82577		1505	9.67587			1505	9.96165		1505	9.93016
		1506	9.85387		1506	9.78196		1506	9.56767			1506	10.0087		1506	9.94928
		1507	9.8789		1507	9.73148		1507	9.46467			1507	10.0474		1507	9.94884
		1508	9.88863		1508	9.68577		1508	9.39331			1508	10.0676		1508	9.9257
		1509	9.87238		1509	9.65765		1509	9.37875			1509	10.0616		1509	9.87932
		1510	9.84033		1510	9.65521		1510	9.42008			1510	10.0344		1510	9.82543
		1511	9.81145		1511	9.67642		1511	9.49518			1511	9.99975		1511	9.7814
		1512	9.78918		1512	9.70718		1512	9.57384			1512	9.97024		1512	9.75776
		1513	9.77418		1513	9.73484		1513	9.63699			1513	9.94792		1513	9.74997
		1514	9.76463		1514	9.75731		1514	9.67945			1514	9.93172		1514	9.75072
		1515	9.76032		1515	9.77418		1515	9.70813			1515	9.92057		1515	9.75497
		1516	9.75771		1516	9.78573		1516	9.7273			1516	9.91282		1516	9.76065
		1517	9.75676		1517	9.7956		1517	9.7419			1517	9.9089		1517	9.76535
		1518	9.75613		1518	9.80425		1518	9.75404			1518	9.90762		1518	9.77
		1519	9.75543		1519	9.81071		1519	9.76392			1519	9.90722		1519	9.77488
		1520	9.7541		1520	9.8148		1520	9.7704			1520	9.90569		1520	9.77899
		1521	9.75345		1521	9.82002		1521	9.77609			1521	9.90415		1521	9.78388
		1522	9.75267		1522	9.82448		1522	9.77897			1522	9.90157		1522	9.79027
		1523	9.75194		1523	9.82843		1523	9.78098			1523	9.89878		1523	9.7951
		1524	9.75169		1524	9.83185		1524	9.78331			1524	9.89653		1524	9.79883
		1525	9.75324		1525	9.83541		1525	9.7862			1525	9.8953		1525	9.80188
		1526	9.75274		1526	9.8373		1526	9.78879			1526	9.89392		1526	9.80425
		1527	9.75195		1527	9.83852		1527	9.79137			1527	9.89268		1527	9.8057
		1528	9.75109		1528	9.84137		1528	9.79318			1528	9.89126		1528	9.80832
		1529	9.75119		1529	9.84382		1529	9.79548			1529	9.89045		1529	9.81188
		1530	9.75027		1530	9.84551		1530	9.79847			1530	9.88868		1530	9.81543
		1531	9.75078		1531	9.84762		1531	9.80103			1531	9.88857		1531	9.81754
		1532	9.75083		1532	9.84923		1532	9.80391			1532	9.88797		1532	9.82032
		1533	9.75171		1533	9.84926		1533	9.80601			1533	9.88863		1533	9.82221
		1534	9.75061		1534	9.84923		1534	9.80864			1534	9.88795		1534	9.82368
		1535	9.75066		1535	9.84968		1535	9.80885			1535	9.888		1535	9.82627
		1536	9.75046		1536	9.85011		1536	9.80831			1536	9.88687		1536	9.83
		1537	9.75126		1537	9.85148		1537	9.80808			1537	9.88739		1537	9.83251
		1538	9.75026		1538	9.85294		1538	9.80785			1538	9.88813		1538	9.83454
		1539	9.75092		1539	9.85477		1539	9.80659			1539	9.88885		1539	9.8371
		1540	9.75066		1540	9.85613		1540	9.80741			1540	9.88954		1540	9.83893
		1541	9.75118		1541	9.85736		1541	9.80949			1541	9.89022		1541	9.83989
		1542	9.75096		1542	9.85814		1542	9.81162			1542	9.89044		1542	9.84173
		1543	9.75133		1543	9.85821		1543	9.81428			1543	9.88965		1543	9.8433
		1544	9.75152		1544	9.85815		1544	9.81568			1544	9.88844		1544	9.8436
		1545	9.75178		1545	9.85785		1545	9.81627			1545	9.8881		1545	9.84501
		1546	9.75145		1546	9.85782		1546	9.81607			1546	9.88717		1546	9.84692
		1547	9.75113		1547	9.8583		1547	9.81588			1547	9.88673		1547	9.84852
		1548	9.75113		1548	9.85904		1548	9.81563			1548	9.88695		1548	9.85122
		1549	9.75137		1549	9.85958		1549	9.81624			1549	9.88723		1549	9.85347
		1550	9.75114		1550	9.85926		1550	9.81714			1550	9.88789		1550	9.85367
		1551	9.75009		1551	9.85986		1551	9.8173			1551	9.88904		1551	9.85351
		1552	9.75006		1552	9.85987		1552	9.817			1552	9.8885		1552	9.85359
		1553	9.75063		1553	9.86014		1553	9.81727			1553	9.88815		1553	9.85401
		1554	9.75134		1554	9.86005		1554	9.81695			1554	9.88825		1554	9.8551
		1555	9.75143		1555	9.86165		1555	9.8163			1555	9.88678		1555	9.85605
		1556	9.75201		1556	9.86139		1556	9.8163			1556	9.88634		1556	9.85739
		1557	9.75231		1557	9.86128		1557	9.81592			1557	9.88655		1557	9.85784
		1558	9.75133		1558	9.86156		1558	9.81571			1558	9.88578		1558	9.85735
		1559	9.75099		1559	9.8617		1559	9.8152			1559	9.88638		1559	9.85785
		1560	9.75103		1560	9.86199		1560	9.81528			1560	9.88782		1560	9.85904
		1561	9.75184		1561	9.86197		1561	9.8157			1561	9.88849		1561	9.85975
		1562	9.7518		1562	9.86186		1562	9.81675			1562	9.88965		1562	9.86063
		1563	9.75203		1563	9.86103		1563	9.81751			1563	9.89055		1563	9.86143
		1564	9.75187		1564	9.86096		1564	9.81787			1564	9.89018		1564	9.86214
		1565	9.75164		1565	9.86094		1565	9.8184			1565	9.88938		1565	9.8622
		1566	9.7507		1566	9.86076		1566	9.81979			1566	9.88861		1566	9.86218
		1567	9.75044		1567	9.86103		1567	9.81977			1567	9.8881		1567	9.86274
		1568	9.75097		1568	9.86164		1568	9.81817			1568	9.88795		1568	9.86272
		1569	9.74943		1569	9.86178		1569	9.81784			1569	9.88783		1569	9.86239
		1570	9.74875		1570	9.86135		1570	9.81748			1570	9.88796		1570	9.86226
		1571	9.7496		1571	9.86158		1571	9.81669			1571	9.88895		1571	9.86201
		1572	9.75006		1572	9.86199		1572	9.81615			1572	9.88958		1572	9.86085
		1573	9.74996		1573	9.8626		1573	9.81808			1573	9.8905		1573	9.86091
		1574	9.74991		1574	9.86317		1574	9.81947			1574	9.89136		1574	9.86037
		1575	9.75055		1575	9.8634		1575	9.81975			1575	9.89106		1575	9.86041
		1576	9.75028		1576	9.86322		1576	9.81894			1576	9.88942		1576	9.86018
		1577	9.75051		1577	9.86194		1577	9.8192			1577	9.88833		1577	9.86095
		1578	9.7508		1578	9.86137		1578	9.81851			1578	9.8874		1578	9.86136
		1579	9.75203		1579	9.861		1579	9.82029			1579	9.88702		1579	9.86202
		1580	9.75207		1580	9.86015		1580	9.82186			1580	9.88749		1580	9.8627
		1581	9.752		1581	9.86008		1581	9.82277			1581	9.88742		1581	9.86435
		1582	9.7519		1582	9.86047		1582	9.82256			1582	9.88763		1582	9.86453
		1583	9.75219		1583	9.85936		1583	9.82121			1583	9.88769		1583	9.86482
		1584	9.75198		1584	9.85969		1584	9.81811			1584	9.88669		1584	9.86566
		1585	9.75205		1585	9.8593		1585	9.81392			1585	9.88641		1585	9.86636
		1586	9.75216		1586	9.86011		1586	9.81227			1586	9.88727		1586	9.86615
		1587	9.75184		1587	9.86062		1587	9.81181			1587	9.88798		1587	9.86768
		1588	9.75086		1588	9.86256		1588	9.81198			1588	9.8886		1588	9.8683
		1589	9.75107		1589	9.86276		1589	9.81205			1589	9.88913		1589	9.8678
		1590	9.75156		1590	9.86405		1590	9.81503			1590	9.88854		1590	9.86764
		1591	9.75239		1591	9.86413		1591	9.81734			1591	9.88841		1591	9.86791
		1592	9.75308		1592	9.86397		1592	9.81849			1592	9.88818		1592	9.86784
		1593	9.7541		1593	9.86285		1593	9.81972			1593	9.88817		1593	9.86703
		1594	9.75467		1594	9.86279		1594	9.82055			1594	9.88799		1594	9.86649
		1595	9.754		1595	9.86357		1595	9.82146			1595	9.88816		1595	9.86553
		1596	9.75356		1596	9.86385		1596	9.82059			1596	9.88722		1596	9.86567
		1597	9.75324		1597	9.86402		1597	9.8201			1597	9.88758		1597	9.86424
		1598	9.75266		1598	9.86395		1598	9.81964			1598	9.88778		1598	9.86429
		1599	9.75176		1599	9.86338		1599	9.81906			1599	9.8881		1599	9.86401
		1600	9.7522		1600	9.86269		1600	9.81683			1600	9.88971		1600	9.86376
		1601	9.75198		1601	9.86263		1601	9.81597			1601	9.89109		1601	9.86287
		1602	9.75239		1602	9.86332		1602	9.81512			1602	9.89043		1602	9.86315
		1603	9.75273		1603	9.86417		1603	9.81412			1603	9.88964		1603	9.86359
		1604	9.75318		1604	9.86436		1604	9.81435			1604	9.88972		1604	9.86409
		1605	9.75279		1605	9.8637		1605	9.81534			1605	9.88912		1605	9.86417
		1606	9.75283		1606	9.86233		1606	9.81592			1606	9.88875		1606	9.86313
		1607	9.75227		1607	9.86137		1607	9.81672			1607	9.88856		1607	9.86263
		1608	9.75348		1608	9.86141		1608	9.8179			1608	9.88855		1608	9.86235
		1609	9.75456		1609	9.86218		1609	9.81855			1609	9.88725		1609	9.86249
		1610	9.75625		1610	9.86231		1610	9.81952			1610	9.88668		1610	9.86389
		1611	9.75701		1611	9.86312		1611	9.8203			1611	9.88675		1611	9.86494
		1612	9.75766		1612	9.86345		1612	9.82009			1612	9.88642		1612	9.86625
		1613	9.75671		1613	9.86323		1613	9.81955			1613	9.88643		1613	9.86648
		1614	9.75615		1614	9.86371		1614	9.81903			1614	9.88825		1614	9.86629
		1615	9.75536		1615	9.8637		1615	9.81813			1615	9.88903		1615	9.86614
		1616	9.75578		1616	9.86388		1616	9.81705			1616	9.88997		1616	9.86622
		1617	9.7556		1617	9.86365		1617	9.81709			1617	9.89075		1617	9.86597
		1618	9.75599		1618	9.86328		1618	9.8171			1618	9.8911		1618	9.86693
		1619	9.7559		1619	9.86163		1619	9.81606			1619	9.89038		1619	9.86826
		1620	9.75645		1620	9.86241		1620	9.81659			1620	9.88947		1620	9.86924
		1621	9.7557		1621	9.8628		1621	9.81775			1621	9.88901		1621	9.87097
		1622	9.7558		1622	9.86334		1622	9.81911			1622	9.89009		1622	9.87139
		1623	9.75592		1623	9.86322		1623	9.81999			1623	9.88989		1623	9.87065
		1624	9.7561		1624	9.86403		1624	9.82031			1624	9.88952		1624	9.86984
		1625	9.75459		1625	9.86315		1625	9.81865			1625	9.88986		1625	9.86883
		1626	9.75437		1626	9.86312		1626	9.81701			1626	9.88967		1626	9.86798
		1627	9.7549		1627	9.86325		1627	9.81547			1627	9.88918		1627	9.86861
		1628	9.75433		1628	9.86411		1628	9.81565			1628	9.88993		1628	9.87002
		1629	9.75445		1629	9.8641		1629	9.81773			1629	9.89084		1629	9.8712
		1630	9.75506		1630	9.86463		1630	9.82017			1630	9.89136		1630	9.87164
		1631	9.75435		1631	9.86472		1631	9.82069			1631	9.89153		1631	9.87084
		1632	9.75377		1632	9.86374		1632	9.81991			1632	9.89155		1632	9.86971
		1633	9.75458		1633	9.86355		1633	9.81927			1633	9.89088		1633	9.86847
		1634	9.75534		1634	9.86329		1634	9.81793			1634	9.89024		1634	9.8675
		1635	9.7564		1635	9.86326		1635	9.81622			1635	9.88989		1635	9.86729
		1636	9.75845		1636	9.86317		1636	9.81653			1636	9.88947		1636	9.86822
		1637	9.75865		1637	9.86347		1637	9.81764			1637	9.88863		1637	9.86814
		1638	9.7576		1638	9.86279		1638	9.81739			1638	9.88899		1638	9.86892
		1639	9.75624		1639	9.8625		1639	9.81672			1639	9.88958		1639	9.86996
		1640	9.75481		1640	9.86186		1640	9.81732			1640	9.88962		1640	9.86952
		1641	9.75317		1641	9.86161		1641	9.81813			1641	9.88945		1641	9.86957
		1642	9.7515		1642	9.8614		1642	9.81939			1642	9.88881		1642	9.87054
		1643	9.75097		1643	9.86208		1643	9.82115			1643	9.88824		1643	9.86988
		1644	9.75151		1644	9.86263		1644	9.82279			1644	9.88838		1644	9.86955
		1645	9.75246		1645	9.86463		1645	9.82279			1645	9.8883		1645	9.87128
		1646	9.75267		1646	9.86555		1646	9.82227			1646	9.88967		1646	9.87156
		1647	9.75479		1647	9.8661		1647	9.82044			1647	9.89067		1647	9.87127
		1648	9.75609		1648	9.86621		1648	9.81798			1648	9.89106		1648	9.87163
		1649	9.75575		1649	9.86576		1649	9.81541			1649	9.89071		1649	9.87246
		1650	9.75537		1650	9.8642		1650	9.81344			1650	9.89045		1650	9.87188
		1651	9.75602		1651	9.86391		1651	9.81187			1651	9.88977		1651	9.87238
		1652	9.75517		1652	9.86423		1652	9.81143			1652	9.8894		1652	9.87339
		1653	9.75463		1653	9.86404		1653	9.81266			1653	9.88865		1653	9.87364
		1654	9.75463		1654	9.86489		1654	9.81391			1654	9.88844		1654	9.87368
		1655	9.75499		1655	9.86517		1655	9.81565			1655	9.88941		1655	9.87316
		1656	9.75477		1656	9.86476		1656	9.81629			1656	9.88866		1656	9.87238
		1657	9.75404		1657	9.86391		1657	9.81673			1657	9.88899		1657	9.87102
		1658	9.75384		1658	9.86376		1658	9.81556			1658	9.89019		1658	9.87157
		1659	9.75345		1659	9.8629		1659	9.8156			1659	9.89123		1659	9.8708
		1660	9.75368		1660	9.86274		1660	9.81587			1660	9.89026		1660	9.87124
		1661	9.75326		1661	9.86236		1661	9.81638			1661	9.88954		1661	9.87169
		1662	9.75404		1662	9.8635		1662	9.81798			1662	9.88875		1662	9.87211
		1663	9.75461		1663	9.86509		1663	9.81926			1663	9.88762		1663	9.8718
		1664	9.75498		1664	9.86659		1664	9.81935			1664	9.88739		1664	9.87212
		1665	9.75471		1665	9.86709		1665	9.81949			1665	9.88712		1665	9.87145
		1666	9.75546		1666	9.86789		1666	9.8192			1666	9.88747		1666	9.87157
		1667	9.75606		1667	9.86738		1667	9.81799			1667	9.88797		1667	9.87164
		1668	9.75602		1668	9.86739		1668	9.8174			1668	9.88827		1668	9.87228
		1669	9.7567		1669	9.86819		1669	9.81766			1669	9.88747		1669	9.87318
		1670	9.75719		1670	9.86837		1670	9.81725			1670	9.88845		1670	9.87431
		1671	9.75729		1671	9.86793		1671	9.81847			1671	9.88984		1671	9.87401
		1672	9.7568		1672	9.86857		1672	9.81982			1672	9.89049		1672	9.87413
		1673	9.75628		1673	9.8674		1673	9.82047			1673	9.89165		1673	9.87321
		1674	9.75577		1674	9.86559		1674	9.82			1674	9.89282		1674	9.87213
		1675	9.75544		1675	9.86552		1675	9.81966			1675	9.89295		1675	9.87197
		1676	9.75577		1676	9.86618		1676	9.8189			1676	9.89329		1676	9.87217
		1677	9.75645		1677	9.86647		1677	9.81676			1677	9.89299		1677	9.87259
		1678	9.75788		1678	9.86726		1678	9.81667			1678	9.89205		1678	9.87322
		1679	9.75846		1679	9.86911		1679	9.81709			1679	9.89112		1679	9.8727
		1680	9.7581		1680	9.87008		1680	9.81778			1680	9.89098		1680	9.87129
		1681	9.75863		1681	9.87046		1681	9.81891			1681	9.89095		1681	9.87083
		1682	9.75971		1682	9.87051		1682	9.82058			1682	9.8916		1682	9.87117
		1683	9.76599		1683	9.86866		1683	9.81055			1683	9.89566		1683	9.87741
		1684	9.79143		1684	9.86227		1684	9.76864			1684	9.91943		1684	9.90178
		1685	9.82919		1685	9.84254		1685	9.69042			1685	9.95957		1685	9.93775
		1686	9.86157		1686	9.80548		1686	9.58569			1686	10.006		1686	9.96966
		1687	9.88564		1687	9.76023		1687	9.48344			1687	10.0434		1687	9.98342
		1688	9.89687		1688	9.7195		1688	9.40908			1688	10.0676		1688	9.97692
		1689	9.88283		1689	9.69001		1689	9.38815			1689	10.0652		1689	9.9448
		1690	9.85209		1690	9.68028		1690	9.42063			1690	10.04		1690	9.89775
		1691	9.82243		1691	9.69309		1691	9.491			1691	10.0044		1691	9.85319
		1692	9.79986		1692	9.71777		1692	9.56601			1692	9.97491		1692	9.82503
		1693	9.78446		1693	9.74245		1693	9.62835			1693	9.95315		1693	9.81091
		1694	9.77564		1694	9.7622		1694	9.6716			1694	9.93707		1694	9.80589
		1695	9.77089		1695	9.77695		1695	9.70299			1695	9.92614		1695	9.80566
		1696	9.76886		1696	9.78902		1696	9.72304			1696	9.91855		1696	9.80613
		1697	9.76751		1697	9.79809		1697	9.73789			1697	9.91413		1697	9.80878
		1698	9.76643		1698	9.80549		1698	9.75069			1698	9.91176		1698	9.81233
		1699	9.76478		1699	9.81235		1699	9.76183			1699	9.91096		1699	9.81578
		1700	9.7642		1700	9.81879		1700	9.76744			1700	9.91083		1700	9.81839
		1701	9.76376		1701	9.82382		1701	9.77294			1701	9.91133		1701	9.82185
		1702	9.76405		1702	9.82819		1702	9.77762			1702	9.9104		1702	9.82462
		1703	9.76325		1703	9.83181		1703	9.78052			1703	9.90749		1703	9.82725
		1704	9.76304		1704	9.83403		1704	9.78331			1704	9.90514		1704	9.82999
		1705	9.76317		1705	9.83694		1705	9.78652			1705	9.90328		1705	9.8323
		1706	9.76236		1706	9.83973		1706	9.78938			1706	9.90114		1706	9.83434
		1707	9.76072		1707	9.84286		1707	9.79191			1707	9.89985		1707	9.83555
		1708	9.7602		1708	9.84628		1708	9.79432			1708	9.90104		1708	9.83684
		1709	9.75955		1709	9.84875		1709	9.79671			1709	9.90039		1709	9.83761
		1710	9.75816		1710	9.85044		1710	9.79822			1710	9.89988		1710	9.83922
		1711	9.75648		1711	9.85201		1711	9.80025			1711	9.89901		1711	9.84151
		1712	9.75661		1712	9.85331		1712	9.80268			1712	9.89768		1712	9.84393
		1713	9.75662		1713	9.85447		1713	9.80496			1713	9.89572		1713	9.84608
		1714	9.75679		1714	9.85636		1714	9.80677			1714	9.89514		1714	9.84801
		1715	9.75776		1715	9.85737		1715	9.80886			1715	9.89427		1715	9.84964
		1716	9.7592		1716	9.85781		1716	9.80982			1716	9.89317		1716	9.85032
		1717	9.75958		1717	9.85913		1717	9.81021			1717	9.89235		1717	9.8517
		1718	9.75949		1718	9.85992		1718	9.81055			1718	9.89219		1718	9.85341
		1719	9.75976		1719	9.86055		1719	9.81146			1719	9.89146		1719	9.85503
		1720	9.75924		1720	9.86199		1720	9.81285			1720	9.89097		1720	9.85709
		1721	9.75952		1721	9.86285		1721	9.81467			1721	9.89159		1721	9.85911
		1722	9.75958		1722	9.86279		1722	9.81678			1722	9.8924		1722	9.86043
		1723	9.75987		1723	9.86286		1723	9.8172			1723	9.89313		1723	9.8606
		1724	9.76021		1724	9.86312		1724	9.81745			1724	9.89311		1724	9.86149
		1725	9.76038		1725	9.86251		1725	9.81755			1725	9.89294		1725	9.86199
		1726	9.75975		1726	9.86283		1726	9.81763			1726	9.89212		1726	9.86244
		1727	9.75916		1727	9.8639		1727	9.81708			1727	9.89238		1727	9.8629
		1728	9.75895		1728	9.86437		1728	9.81674			1728	9.89251		1728	9.86326
		1729	9.75769		1729	9.8643		1729	9.81698			1729	9.89367		1729	9.86418
		1730	9.75706		1730	9.86495		1730	9.81591			1730	9.89367		1730	9.86461
		1731	9.75783		1731	9.86558		1731	9.81307			1731	9.89557		1731	9.8655
		1732	9.75761		1732	9.86513		1732	9.81051			1732	9.89579		1732	9.86715
		1733	9.75705		1733	9.86504		1733	9.80953			1733	9.89595		1733	9.86877
		1734	9.75769		1734	9.8643		1734	9.80805			1734	9.89361		1734	9.86961
		1735	9.7576		1735	9.86394		1735	9.80858			1735	9.89249		1735	9.87028
		1736	9.75788		1736	9.86398		1736	9.80947			1736	9.89037		1736	9.87151
		1737	9.75868		1737	9.86508		1737	9.81122			1737	9.88958		1737	9.87142
		1738	9.76017		1738	9.86562		1738	9.81224			1738	9.88879		1738	9.87153
		1739	9.76047		1739	9.86754		1739	9.81337			1739	9.89089		1739	9.87036
		1740	9.76108		1740	9.86799		1740	9.81379			1740	9.89221		1740	9.86958
		1741	9.76093		1741	9.86701		1741	9.81511			1741	9.89241		1741	9.86844
		1742	9.76157		1742	9.86696		1742	9.816			1742	9.8917		1742	9.86831
		1743	9.76231		1743	9.86762		1743	9.81648			1743	9.89168		1743	9.86918
		1744	9.76232		1744	9.86724		1744	9.81747			1744	9.89185		1744	9.87046
		1745	9.76269		1745	9.86717		1745	9.81833			1745	9.89176		1745	9.87142
		1746	9.76256		1746	9.86764		1746	9.81849			1746	9.89212		1746	9.87181
		1747	9.76138		1747	9.86701		1747	9.81866			1747	9.8933		1747	9.8717
		1748	9.76021		1748	9.86626		1748	9.81986			1748	9.89273		1748	9.87139
		1749	9.76048		1749	9.86629		1749	9.81952			1749	9.89141		1749	9.87193
		1750	9.76134		1750	9.867		1750	9.81897			1750	9.89165		1750	9.873
		1751	9.76259		1751	9.86849		1751	9.82012			1751	9.89152		1751	9.87374
		1752	9.76412		1752	9.86907		1752	9.81983			1752	9.88992		1752	9.8739
		1753	9.76534		1753	9.86936		1753	9.8194			1753	9.89067		1753	9.87325
		1754	9.76624		1754	9.86874		1754	9.81872			1754	9.89055		1754	9.87229
		1755	9.76612		1755	9.86899		1755	9.81755			1755	9.88967		1755	9.87132
		1756	9.76517		1756	9.8688		1756	9.81633			1756	9.89086		1756	9.87125
		1757	9.76524		1757	9.86866		1757	9.816			1757	9.89243		1757	9.87209
		1758	9.7636		1758	9.86866		1758	9.81576			1758	9.89255		1758	9.87239
		1759	9.76211		1759	9.86905		1759	9.81694			1759	9.89367		1759	9.87351
		1760	9.76133		1760	9.86886		1760	9.81876			1760	9.89416		1760	9.87466
		1761	9.7605		1761	9.86823		1761	9.82001			1761	9.8932		1761	9.87514
		1762	9.75913		1762	9.86765		1762	9.82211			1762	9.89337		1762	9.87498
		1763	9.75902		1763	9.86733		1763	9.82202			1763	9.89361		1763	9.8758
		1764	9.75977		1764	9.86729		1764	9.82052			1764	9.89377		1764	9.87451
		1765	9.75957		1765	9.86668		1765	9.81978			1765	9.89479		1765	9.87377
		1766	9.76		1766	9.86679		1766	9.81837			1766	9.89507		1766	9.87375
		1767	9.76055		1767	9.86734		1767	9.81656			1767	9.89462		1767	9.8735
		1768	9.76198		1768	9.86858		1768	9.81651			1768	9.89409		1768	9.87375
		1769	9.76286		1769	9.86898		1769	9.81778			1769	9.89345		1769	9.87516
		1770	9.76441		1770	9.8695		1770	9.81777			1770	9.89257		1770	9.87508
		1771	9.76557		1771	9.86907		1771	9.81876			1771	9.89261		1771	9.87433
		1772	9.76621		1772	9.86869		1772	9.81884			1772	9.89301		1772	9.87376
		1773	9.76614		1773	9.86829		1773	9.81877			1773	9.89335		1773	9.87371
		1774	9.76598		1774	9.86856		1774	9.81766			1774	9.89355		1774	9.87373
		1775	9.76525		1775	9.8686		1775	9.81732			1775	9.89335		1775	9.87452
		1776	9.76418		1776	9.86929		1776	9.8188			1776	9.89227		1776	9.8745
		1777	9.76286		1777	9.87019		1777	9.8209			1777	9.89149		1777	9.87484
		1778	9.76161		1778	9.87087		1778	9.8213			1778	9.89175		1778	9.87408
		1779	9.76023		1779	9.87104		1779	9.82216			1779	9.89132		1779	9.87391
		1780	9.75962		1780	9.87087		1780	9.82197			1780	9.89172		1780	9.87402
		1781	9.76085		1781	9.87074		1781	9.8202			1781	9.8927		1781	9.87491
		1782	9.76224		1782	9.87046		1782	9.818			1782	9.89357		1782	9.87589
		1783	9.76263		1783	9.87112		1783	9.81627			1783	9.8934		1783	9.87628
		1784	9.76328		1784	9.87164		1784	9.81593			1784	9.89366		1784	9.87636
		1785	9.7637		1785	9.87232		1785	9.81703			1785	9.89367		1785	9.87606
		1786	9.76261		1786	9.87289		1786	9.81723			1786	9.89374		1786	9.87543
		1787	9.76171		1787	9.87315		1787	9.81788			1787	9.89428		1787	9.87515
		1788	9.76171		1788	9.87212		1788	9.81929			1788	9.89409		1788	9.87499
		1789	9.76148		1789	9.87016		1789	9.82002			1789	9.89546		1789	9.87456
		1790	9.76132		1790	9.86859		1790	9.8199			1790	9.89634		1790	9.87415
		1791	9.76158		1791	9.86861		1791	9.82023			1791	9.89688		1791	9.87502
		1792	9.76278		1792	9.86825		1792	9.81904			1792	9.89664		1792	9.87503
		1793	9.76348		1793	9.86718		1793	9.81856			1793	9.89772		1793	9.87652
		1794	9.76448		1794	9.86861		1794	9.81793			1794	9.89811		1794	9.87722
		1795	9.76549		1795	9.86984		1795	9.8175			1795	9.89803		1795	9.87786
		1796	9.76566		1796	9.86914		1796	9.8162			1796	9.89739		1796	9.87681
		1797	9.76439		1797	9.86882		1797	9.81641			1797	9.89672		1797	9.87613
		1798	9.76376		1798	9.87041		1798	9.81755			1798	9.89611		1798	9.87525
		1799	9.76305		1799	9.87055		1799	9.81844			1799	9.89496		1799	9.87542
		1800	9.76306		1800	9.87086		1800	9.81903			1800	9.89467		1800	9.87519
		1801	9.76376		1801	9.87121		1801	9.82071			1801	9.89521		1801	9.876
		1802	9.76398		1802	9.87229		1802	9.82274			1802	9.89525		1802	9.87657
		1803	9.76424		1803	9.87172		1803	9.82301			1803	9.89485		1803	9.87616
		1804	9.76428		1804	9.87259		1804	9.82281			1804	9.89522		1804	9.87542
		1805	9.7635		1805	9.87332		1805	9.82259			1805	9.89516		1805	9.87611
		1806	9.76266		1806	9.87413		1806	9.82294			1806	9.89508		1806	9.87597
		1807	9.7634		1807	9.87387		1807	9.82235			1807	9.89597		1807	9.8758
		1808	9.76369		1808	9.87339		1808	9.82192			1808	9.89683		1808	9.87634
		1809	9.76364		1809	9.87281		1809	9.82228			1809	9.89727		1809	9.8774
		1810	9.76338		1810	9.87213		1810	9.82212			1810	9.89734		1810	9.87792
		1811	9.76303		1811	9.87148		1811	9.82091			1811	9.89755		1811	9.87902
		1812	9.76301		1812	9.87088		1812	9.82099			1812	9.89762		1812	9.87907
		1813	9.76298		1813	9.87157		1813	9.82116			1813	9.89767		1813	9.87909
		1814	9.76237		1814	9.87074		1814	9.82002			1814	9.89748		1814	9.87804
		1815	9.76138		1815	9.87072		1815	9.82043			1815	9.89795		1815	9.87735
		1816	9.76225		1816	9.87148		1816	9.82001			1816	9.89732		1816	9.87725
		1817	9.76195		1817	9.87159		1817	9.81923			1817	9.89729		1817	9.87857
		1818	9.76252		1818	9.87143		1818	9.8188			1818	9.89678		1818	9.87907
		1819	9.76375		1819	9.87215		1819	9.8203			1819	9.89667		1819	9.88026
		1820	9.76523		1820	9.8715		1820	9.82118			1820	9.89663		1820	9.88028
		1821	9.76478		1821	9.87135		1821	9.82237			1821	9.89709		1821	9.87967
		1822	9.76515		1822	9.87222		1822	9.82295			1822	9.89618		1822	9.8783
		1823	9.76614		1823	9.87191		1823	9.82402			1823	9.8954		1823	9.87763
		1824	9.76667		1824	9.87193		1824	9.82489			1824	9.89486		1824	9.87654
		1825	9.76722		1825	9.87266		1825	9.82577			1825	9.89432		1825	9.87567
		1826	9.76807		1826	9.87224		1826	9.82588			1826	9.89441		1826	9.87539
		1827	9.76812		1827	9.87198		1827	9.82555			1827	9.8952		1827	9.87616
		1828	9.76692		1828	9.87319		1828	9.82459			1828	9.89552		1828	9.87701
		1829	9.76612		1829	9.87374		1829	9.82265			1829	9.89537		1829	9.87776
		1830	9.76548		1830	9.87325		1830	9.81965			1830	9.89527		1830	9.87842
		1831	9.76497		1831	9.87286		1831	9.81677			1831	9.89467		1831	9.87777
		1832	9.76409		1832	9.87284		1832	9.81624			1832	9.89331		1832	9.87675
		1833	9.76353		1833	9.87137		1833	9.81686			1833	9.89321		1833	9.87616
		1834	9.76309		1834	9.87109		1834	9.81834			1834	9.89335		1834	9.87668
		1835	9.76295		1835	9.87196		1835	9.82025			1835	9.89418		1835	9.87796
		1836	9.76353		1836	9.87209		1836	9.82195			1836	9.89492		1836	9.87962
		1837	9.76447		1837	9.87237		1837	9.82312			1837	9.89467		1837	9.88075
		1838	9.76478		1838	9.87317		1838	9.8217			1838	9.89504		1838	9.8813
		1839	9.76537		1839	9.87153		1839	9.82032			1839	9.89515		1839	9.8804
		1840	9.7662		1840	9.87062		1840	9.81958			1840	9.89458		1840	9.87942
		1841	9.76573		1841	9.87113		1841	9.81951			1841	9.89437		1841	9.87977
		1842	9.7664		1842	9.87122		1842	9.818			1842	9.8964		1842	9.88034
		1843	9.76737		1843	9.87105		1843	9.81833			1843	9.89705		1843	9.88119
		1844	9.76764		1844	9.87216		1844	9.8181			1844	9.89759		1844	9.88163
		1845	9.76767		1845	9.87269		1845	9.81657			1845	9.89771		1845	9.88187
		1846	9.76751		1846	9.87311		1846	9.81538			1846	9.89752		1846	9.8811
		1847	9.76671		1847	9.87296		1847	9.81592			1847	9.89709		1847	9.88082
		1848	9.76545		1848	9.87386		1848	9.81554			1848	9.89697		1848	9.8792
		1849	9.76399		1849	9.87348		1849	9.81558			1849	9.89749		1849	9.87941
		1850	9.76305		1850	9.87355		1850	9.81789			1850	9.898		1850	9.87929
		1851	9.76194		1851	9.87367		1851	9.82053			1851	9.8993		1851	9.87937
		1852	9.76167		1852	9.87345		1852	9.82096			1852	9.89932		1852	9.87912
		1853	9.76182		1853	9.87185		1853	9.82218			1853	9.89895		1853	9.8791
		1854	9.76332		1854	9.87277		1854	9.82304			1854	9.8976		1854	9.87924
		1855	9.76332		1855	9.87361		1855	9.82292			1855	9.89627		1855	9.8787
		1856	9.76406		1856	9.87312		1856	9.8237			1856	9.89509		1856	9.87842
		1857	9.7644		1857	9.87284		1857	9.82453			1857	9.89448		1857	9.87815
		1858	9.76512		1858	9.87374		1858	9.82475			1858	9.89372		1858	9.87851
		1859	9.76435		1859	9.87409		1859	9.82429			1859	9.89367		1859	9.8789
		1860	9.76389		1860	9.87391		1860	9.82379			1860	9.89505		1860	9.8793
		1861	9.76498		1861	9.87402		1861	9.82381			1861	9.8958		1861	9.8789
		1862	9.76636		1862	9.87448		1862	9.8243			1862	9.89655		1862	9.87883
		1863	9.77117		1863	9.87406		1863	9.81955			1863	9.89961		1863	9.8833
		1864	9.79435		1864	9.8711		1864	9.79014			1864	9.91642		1864	9.90403
		1865	9.83222		1865	9.85965		1865	9.72528			1865	9.94843		1865	9.93615
		1866	9.86572		1866	9.83172		1866	9.62984			1866	9.97981		1866	9.95808
		1867	9.88961		1867	9.79329		1867	9.52748			1867	10.0041		1867	9.96757
		1868	9.90239		1868	9.75409		1868	9.44464			1868	10.0198		1868	9.9641
		1869	9.89171		1869	9.72268		1869	9.40726			1869	10.0159		1869	9.93958
		1870	9.86149		1870	9.70593		1870	9.42305			1870	9.99245		1870	9.90289
		1871	9.83195		1871	9.71164		1871	9.48121			1871	9.96588		1871	9.8761
		1872	9.81034		1872	9.73153		1872	9.55372			1872	9.94558		1872	9.862
		1873	9.79412		1873	9.7547		1873	9.61737			1873	9.9314		1873	9.85606
		1874	9.78392		1874	9.77446		1874	9.66469			1874	9.92207		1874	9.8541
		1875	9.77889		1875	9.78879		1875	9.69685			1875	9.91604		1875	9.85407
		1876	9.77571		1876	9.79995		1876	9.71823			1876	9.91381		1876	9.85531
		1877	9.77364		1877	9.80866		1877	9.73312			1877	9.91244		1877	9.85591
		1878	9.7743		1878	9.81676		1878	9.74546			1878	9.91158		1878	9.85663
		1879	9.77468		1879	9.82349		1879	9.75425			1879	9.91106		1879	9.85809
		1880	9.77431		1880	9.83044		1880	9.76166			1880	9.91012		1880	9.85964
		1881	9.77457		1881	9.83528		1881	9.76768			1881	9.90847		1881	9.86094
		1882	9.77372		1882	9.83889		1882	9.77301			1882	9.90764		1882	9.8635
		1883	9.77174		1883	9.8415		1883	9.77659			1883	9.90668		1883	9.86557
		1884	9.76998		1884	9.84425		1884	9.78084			1884	9.90497		1884	9.86716
		1885	9.76865		1885	9.84721		1885	9.7848			1885	9.9045		1885	9.86883
		1886	9.76783		1886	9.8497		1886	9.78923			1886	9.90395		1886	9.86923
		1887	9.7678		1887	9.85328		1887	9.79362			1887	9.90129		1887	9.86919
		1888	9.76752		1888	9.85631		1888	9.79727			1888	9.89978		1888	9.86889
		1889	9.76812		1889	9.85898		1889	9.80062			1889	9.89943		1889	9.86935
		1890	9.76905		1890	9.86025		1890	9.80242			1890	9.89848		1890	9.8691
		1891	9.76977		1891	9.86082		1891	9.80405			1891	9.89853		1891	9.87015
		1892	9.77028		1892	9.86215		1892	9.80613			1892	9.89979		1892	9.8708
		1893	9.77043		1893	9.86335		1893	9.80865			1893	9.90034		1893	9.87198
		1894	9.76961		1894	9.86352		1894	9.81024			1894	9.90041		1894	9.87199
		1895	9.76828		1895	9.86461		1895	9.81191			1895	9.89985		1895	9.87277
		1896	9.76714		1896	9.86643		1896	9.81314			1896	9.89906		1896	9.87388
		1897	9.7658		1897	9.86694		1897	9.8135			1897	9.89871		1897	9.8747
		1898	9.76494		1898	9.86769		1898	9.81397			1898	9.89856		1898	9.87618
		1899	9.76471		1899	9.86903		1899	9.81482			1899	9.89866		1899	9.87774
		1900	9.76482		1900	9.87041		1900	9.81641			1900	9.89879		1900	9.87923
		1901	9.76502		1901	9.87112		1901	9.81713			1901	9.89913		1901	9.87975
		1902	9.76546		1902	9.87158		1902	9.81817			1902	9.8995		1902	9.88054
		1903	9.76686		1903	9.87209		1903	9.81903			1903	9.89999		1903	9.88062
		1904	9.76834		1904	9.8722		1904	9.81805			1904	9.90034		1904	9.88033
		1905	9.76939		1905	9.87217		1905	9.81729			1905	9.90058		1905	9.88046
		1906	9.76918		1906	9.87327		1906	9.81671			1906	9.89995		1906	9.8798
		1907	9.76988		1907	9.87356		1907	9.81642			1907	9.89938		1907	9.87891
		1908	9.76932		1908	9.87439		1908	9.81598			1908	9.89841		1908	9.87869
		1909	9.76812		1909	9.87352		1909	9.81747			1909	9.89786		1909	9.87936
		1910	9.76731		1910	9.87214		1910	9.81879			1910	9.89852		1910	9.87855
		1911	9.76733		1911	9.87164		1911	9.81935			1911	9.89901		1911	9.87913
		1912	9.76629		1912	9.87104		1912	9.82035			1912	9.89952		1912	9.87987
		1913	9.76622		1913	9.87033		1913	9.82121			1913	9.89918		1913	9.88008
		1914	9.76751		1914	9.87188		1914	9.82053			1914	9.89843		1914	9.87959
		1915	9.7686		1915	9.87373		1915	9.81858			1915	9.89765		1915	9.88039
		1916	9.76846		1916	9.87435		1916	9.81899			1916	9.89776		1916	9.88073
		1917	9.76867		1917	9.87521		1917	9.81855			1917	9.89754		1917	9.88118
		1918	9.76869		1918	9.8759		1918	9.81819			1918	9.89855		1918	9.88168
		1919	9.76743		1919	9.87565		1919	9.81897			1919	9.89976		1919	9.88179
		1920	9.76671		1920	9.87569		1920	9.82063			1920	9.89962		1920	9.88128
		1921	9.76683		1921	9.87669		1921	9.82043			1921	9.89989		1921	9.88208
		1922	9.7684		1922	9.87761		1922	9.82063			1922	9.90017		1922	9.88201
		1923	9.76947		1923	9.87823		1923	9.82143			1923	9.90027		1923	9.88205
		1924	9.77044		1924	9.87983		1924	9.82219			1924	9.90004		1924	9.88267
		1925	9.7705		1925	9.87927		1925	9.82282			1925	9.90079		1925	9.88285
		1926	9.76993		1926	9.87747		1926	9.82351			1926	9.90068		1926	9.88171
		1927	9.768		1927	9.87661		1927	9.82333			1927	9.90103		1927	9.88092
		1928	9.76746		1928	9.87523		1928	9.82338			1928	9.90064		1928	9.88055
		1929	9.76633		1929	9.87384		1929	9.82162			1929	9.90081		1929	9.87965
		1930	9.76569		1930	9.87453		1930	9.81927			1930	9.89923		1930	9.87992
		1931	9.76616		1931	9.87576		1931	9.8181			1931	9.89844		1931	9.88057
		1932	9.76647		1932	9.87598		1932	9.81936			1932	9.89658		1932	9.88228
		1933	9.7658		1933	9.87609		1933	9.81853			1933	9.89646		1933	9.88249
		1934	9.76618		1934	9.87655		1934	9.81995			1934	9.89572		1934	9.88373
		1935	9.76765		1935	9.87482		1935	9.82108			1935	9.89685		1935	9.88443
		1936	9.76851		1936	9.87438		1936	9.82157			1936	9.89735		1936	9.88541
		1937	9.76998		1937	9.87566		1937	9.82101			1937	9.89897		1937	9.88501
		1938	9.77143		1938	9.87567		1938	9.82084			1938	9.89981		1938	9.88581
		1939	9.77254		1939	9.87586		1939	9.82047			1939	9.90073		1939	9.88539
		1940	9.77279		1940	9.87762		1940	9.82033			1940	9.90112		1940	9.88486
		1941	9.77399		1941	9.87684		1941	9.82031			1941	9.90216		1941	9.88454
		1942	9.77422		1942	9.8747		1942	9.82077			1942	9.90224		1942	9.88425
		1943	9.77422		1943	9.87535		1943	9.82205			1943	9.90126		1943	9.88371
		1944	9.7737		1944	9.87464		1944	9.8222			1944	9.90042		1944	9.88438
		1945	9.77296		1945	9.87367		1945	9.82211			1945	9.89974		1945	9.88452
		1946	9.7712		1946	9.87503		1946	9.82124			1946	9.89865		1946	9.88456
		1947	9.76973		1947	9.87652		1947	9.81986			1947	9.89824		1947	9.88485
		1948	9.76887		1948	9.87765		1948	9.81952			1948	9.89948		1948	9.88532
		1949	9.76868		1949	9.87914		1949	9.82052			1949	9.90021		1949	9.88565
		1950	9.76877		1950	9.87986		1950	9.82209			1950	9.90098		1950	9.88553
		1951	9.76968		1951	9.87837		1951	9.82335			1951	9.9021		1951	9.8848
		1952	9.7697		1952	9.87799		1952	9.82374			1952	9.90305		1952	9.88434
		1953	9.77058		1953	9.87679		1953	9.82253			1953	9.90238		1953	9.88323
		1954	9.77075		1954	9.87497		1954	9.82133			1954	9.90195		1954	9.88305
		1955	9.77132		1955	9.87471		1955	9.82106			1955	9.9012		1955	9.8827
		1956	9.77028		1956	9.87631		1956	9.82116			1956	9.90025		1956	9.88345
		1957	9.77033		1957	9.8769		1957	9.82192			1957	9.89876		1957	9.88476
		1958	9.76964		1958	9.87803		1958	9.82262			1958	9.89893		1958	9.88656
		1959	9.7696		1959	9.87925		1959	9.82374			1959	9.89933		1959	9.88728
		1960	9.76937		1960	9.87938		1960	9.82364			1960	9.90104		1960	9.88837
		1961	9.7709		1961	9.87867		1961	9.8236			1961	9.90226		1961	9.88816
		1962	9.77188		1962	9.8781		1962	9.82322			1962	9.90293		1962	9.88714
		1963	9.77218		1963	9.87748		1963	9.82334			1963	9.90135		1963	9.88577
		1964	9.77221		1964	9.87638		1964	9.82223			1964	9.90116		1964	9.88396
		1965	9.77246		1965	9.87662		1965	9.82277			1965	9.89977		1965	9.88327
		1966	9.77134		1966	9.87734		1966	9.82213			1966	9.89839		1966	9.88357
		1967	9.77081		1967	9.87733		1967	9.82299			1967	9.89894		1967	9.88357
		1968	9.77025		1968	9.87764		1968	9.82316			1968	9.90036		1968	9.8835
		1969	9.77016		1969	9.87891		1969	9.82285			1969	9.90008		1969	9.88389
		1970	9.76929		1970	9.87967		1970	9.82232			1970	9.89972		1970	9.88452
		1971	9.76957		1971	9.87935		1971	9.82294			1971	9.901		1971	9.88432
		1972	9.76953		1972	9.87958		1972	9.8221			1972	9.90125		1972	9.88567
		1973	9.76953		1973	9.87978		1973	9.82184			1973	9.90102		1973	9.88649
		1974	9.76963		1974	9.8795		1974	9.82268			1974	9.90009		1974	9.88656
		1975	9.76994		1975	9.87897		1975	9.82398			1975	9.90043		1975	9.88611
		1976	9.77058		1976	9.87966		1976	9.82759			1976	9.89972		1976	9.8861
		1977	9.77081		1977	9.87927		1977	9.83004			1977	9.89875		1977	9.88555
		1978	9.77134		1978	9.87929		1978	9.8306			1978	9.89888		1978	9.88534
		1979	9.77112		1979	9.8806		1979	9.83103			1979	9.90021		1979	9.88617
		1980	9.77147		1980	9.88255		1980	9.82925			1980	9.89976		1980	9.88647
		1981	9.77173		1981	9.88386		1981	9.82435			1981	9.89941		1981	9.88689
		1982	9.77212		1982	9.88678		1982	9.81989			1982	9.90007		1982	9.88725
		1983	9.77206		1983	9.88764		1983	9.81946			1983	9.90002		1983	9.88784
		1984	9.77229		1984	9.88739		1984	9.8185			1984	9.89995		1984	9.8882
		1985	9.77199		1985	9.8871		1985	9.81968			1985	9.9003		1985	9.88791
		1986	9.77103		1986	9.88656		1986	9.82101			1986	9.90062		1986	9.88665
		1987	9.77054		1987	9.88595		1987	9.82292			1987	9.89994		1987	9.88593
		1988	9.77112		1988	9.88784		1988	9.82152			1988	9.89959		1988	9.88667
		1989	9.7711		1989	9.8895		1989	9.8219			1989	9.89968		1989	9.88644
		1990	9.77083		1990	9.8896		1990	9.82226			1990	9.90007		1990	9.88662
		1991	9.77065		1991	9.88974		1991	9.82318			1991	9.90006		1991	9.88743
		1992	9.77005		1992	9.88914		1992	9.82203			1992	9.90097		1992	9.88716
		1993	9.76951		1993	9.88777		1993	9.82127			1993	9.90127		1993	9.88594
		1994	9.76957		1994	9.88779		1994	9.81983			1994	9.90136		1994	9.88611
		1995	9.77003		1995	9.88879		1995	9.81792			1995	9.90139		1995	9.88695
		1996	9.7711		1996	9.88878		1996	9.81638			1996	9.90038		1996	9.8875
		1997	9.77245		1997	9.88864		1997	9.81664			1997	9.89927		1997	9.88849
		1998	9.7731		1998	9.88778		1998	9.81905			1998	9.89922		1998	9.88895
		1999	9.77391		1999	9.88648		1999	9.81982			1999	9.89888		1999	9.88899
		2000	9.77363		2000	9.88495		2000	9.81932			2000	9.89919		2000	9.88818
		2001	9.77429		2001	9.88419		2001	9.81896			2001	9.90127		2001	9.88822
[truncated: 3,463 more rows]

## Sheet: Fig6b
Figure 6b	Kinetic parameters measured by SPR for each independent experiments
					kon (1/Ms)	koff (1/s)	KD (M)
				Xph15-ETWV	3414000	0.0009262	2.713e-10
					4090000	0.0009012	2.203e-10
				Xph18-ETWV	3269000	3.565e-05	1.091e-11
					1233000	0.0005498	4.458e-10
					3590000	0.0003068	8.547e-11
					1853000	0.000466	2.515e-10
					1696000	0.0003612	2.129e-10
				Xph20-ETWV	4640000	0.0003976	8.569e-11
					3511000	0.0006222	1.772e-10
					5778000	0.0003264	5.65e-11
					20940000	0.0007515	3.589e-11
				Xph18-Stg	101400000	0.002022	1.994e-11
					19750000	0.0009556	4.838e-11
				Xph20-Stg	23130000	0.0008662	3.745e-11
					13030000	0.0009275	7.117e-11

## Sheet: Fig6c
Figure 6c	Competitive titration
	Normalized raw intensities	Xph20-ETWV (nM)	PSD95-12					SAP97-12				Xph20-ETWV (nM)	PSD93-12			SAP102-12				FN3-ETWV (nM)	PSD95-12
		0.01	1	1	1	1		1	1			0.01	1	1		1	1			0.01	1	1
		24		1.06379	0.929067	0.882376		0.963816	0.948673			36	1.00191	0.957593		0.971476	1.01045			24	1.05416	0.970129
		240	0.884983	0.868982	0.850069	0.709503		0.965125	0.999826			360	1.00011	0.843278		0.968451	0.986624			240	1.09738	0.922749
		1200	0.319274	0.251956	0.28416	0.229341		0.976972	0.960873			1800	0.826965	0.833376		0.989745	0.877531			1200	0.964136	0.902152
		2400	0.25434	0.199393	0.192877	0.165896		0.817086	0.792155			3600	0.699988	0.826268		0.905741	0.770212			2400	0.934915	0.895584
		4800	0.188924	0.138683	0.125618	0.096211		0.65286	0.671976			7200	0.631855	0.621447		0.743648	0.566373			4800	0.735847	0.723728
		9600	0.093069	0.072102	0.052102	0.04956		0.338236	0.40964			14400	0.398765	0.412965		0.541071	0.415193			9600	0.578972	0.591044
		19200	0	0.020691	0	0.005058		0.08616	0.106342			28800	0.251902			0.265511	0.207254			19200	0.328969	0.403648
		60000	0	0	0	0.00183		0.033729	0.041399			90000	0.096883	0.110999		0.099047	0.100951			60000	0.090632	0.094828
																				120000		0.047169

## Sheet: Fig7c&d
Figure 7c & 7d	Proteomic analysis of pull-down material
					Purple	Dlg4/PSD-95
					Red	PDZ domain-containg proteins (including PSD-95-associated proteins)
					Blue	PSD-95-associated proteins based on Fernández et al., Mol Syst Biol, 5, 269 (2009)
					Black	Other proteins
			Checked	Master	Accession	Description	Coverage [%]	Contaminant	Marked as	# Peptides	# PSMs	# Unique Peptides	# AAs	MW [kDa]	calc. pI	Score Sequest HT: Sequest HT	# Peptides (by Search Engine): Sequest HT	Abundance Ratio: (Xph20-ETWV) / (Scarlet)	Abundance Ratio: (Xph0-ETWV) / (Scarlet)	Abundance Ratio Adj. P-Value: (Xph20-ETWV) / (Scarlet)	Abundance Ratio Adj. P-Value: (Xph0-ETWV) / (Scarlet)	Abundances (Grouped): Scarlet	Abundances (Grouped): Xph0-ETWV	Abundances (Grouped): Xph20-ETWV	Abundances (Grouped) CV [%]: Scarlet	Abundances (Grouped) CV [%]: Xph0-ETWV	Abundances (Grouped) CV [%]: Xph20-ETWV	Abundances (Normalized): F1: Sample, Scarlet	Abundances (Normalized): F2: Sample, Scarlet	Abundances (Normalized): F3: Sample, Scarlet	Abundances (Normalized): F7: Sample, Xph0-ETWV	Abundances (Normalized): F8: Sample, Xph0-ETWV	Abundances (Normalized): F9: Sample, Xph0-ETWV	Abundances (Normalized): F10: Sample, Xph20-ETWV	Abundances (Normalized): F11: Sample, Xph20-ETWV	Abundances (Normalized): F12: Sample, Xph20-ETWV	Abundance: F1: Sample, Scarlet	Abundance: F2: Sample, Scarlet	Abundance: F3: Sample, Scarlet	Abundance: F7: Sample, Xph0-ETWV	Abundance: F8: Sample, Xph0-ETWV	Abundance: F9: Sample, Xph0-ETWV	Abundance: F10: Sample, Xph20-ETWV	Abundance: F11: Sample, Xph20-ETWV	Abundance: F12: Sample, Xph20-ETWV	# Protein Groups
			FALSE	Master Protein	A0A0G2K401	Propionyl-CoA carboxylase alpha chain, mitochondrial OS=Rattus norvegicus OX=10116 GN=Pcca PE=1 SV=1	55	FALSE	RAT	49	640	6	723	79.8	7.21	1997.4	49	1.255	1.731	0.00103958	3.27211e-05	3.75291e+07	6.49613e+07	4.71032e+07	0.97	2.82	6.08	3.75291e+07	3.73511e+07	3.80558e+07	6.39703e+07	6.49613e+07	6.75518e+07	4.71032e+07	5.17051e+07	4.62387e+07	3.643e+07	3.59809e+07	3.58211e+07	6.39703e+07	6.27094e+07	6.2085e+07	4.49017e+07	4.82543e+07	4.18307e+07	1
			FALSE	Master Protein	P14882	Propionyl-CoA carboxylase alpha chain, mitochondrial OS=Rattus norvegicus OX=10116 GN=Pcca PE=1 SV=3	52	FALSE	RAT	44	564	1	737	81.6	7.69	1787.6	44	0.139	0.298	0.00607055		261994	77985.9	36382.6	32.5		26.92	167277	261994	331443		77985.9		27819.8	36382.6	47862.8	162378	252383	311980		75282.5		26519.6	33954.5	43300	1
			FALSE	Master Protein	Q5XIT9	Methylcrotonoyl-CoA carboxylase beta chain, mitochondrial OS=Rattus norvegicus OX=10116 GN=Mccc2 PE=2 SV=1	52	FALSE	RAT	28	331	28	563	61.5	8.31	1089.28	28	1.697	2.384	2.19936e-06	2.02102e-07	4.27234e+07	1.01868e+08	7.25119e+07	0.76	2.44	2.71	4.27234e+07	4.30838e+07	4.24318e+07	9.89251e+07	1.01868e+08	1.03846e+08	6.91583e+07	7.25119e+07	7.25174e+07	4.14723e+07	4.15033e+07	3.99401e+07	9.89251e+07	9.83367e+07	9.54418e+07	6.5926e+07	6.76725e+07	6.56041e+07	1
			FALSE	Master Protein	A0A0G2JTL5	Pyruvate carboxylase, mitochondrial OS=Rattus norvegicus OX=10116 GN=Pc PE=1 SV=1	34	FALSE	RAT	39	342	39	1277	139.9	6.77	974.38	39	1.12	1.345	0.00184286	4.62081e-05	5.22992e+07	7.03273e+07	5.85766e+07	0.93	0.86	3.57	5.20142e+07	5.22992e+07	5.29674e+07	6.93792e+07	7.03273e+07	7.04977e+07	5.85766e+07	5.77977e+07	6.17952e+07	5.0491e+07	5.03806e+07	4.9857e+07	6.93792e+07	6.78894e+07	6.47925e+07	5.58388e+07	5.39404e+07	5.59041e+07	1
			FALSE	Master Protein	Q6P6Q2	Keratin, type II cytoskeletal 5 OS=Rattus norvegicus OX=10116 GN=Krt5 PE=1 SV=1	34	FALSE	RAT	32	309	15	576	61.8	7.8	896.06	32	1.967	1.651	1.14238e-07	2.64962e-06	5.77463e+06	9.53393e+06	1.13601e+07	0.3	2.15	2.22	5.79221e+06	5.77463e+06	5.75786e+06	9.53393e+06	9.47478e+06	9.85949e+06	1.09885e+07	1.13601e+07	1.14632e+07	5.62258e+06	5.56279e+06	5.41975e+06	9.53393e+06	9.14633e+06	9.06158e+06	1.04749e+07	1.06019e+07	1.03703e+07	1
			FALSE	Master Protein	F1LP30	Methylcrotonoyl-CoA carboxylase subunit alpha, mitochondrial OS=Rattus norvegicus OX=10116 GN=Mccc1 PE=1 SV=1	44	FALSE	RAT	31	281	31	715	79.2	7.14	880.43	31	1.383	1.346	0.000198099	0.000525204	4.11164e+07	5.53296e+07	5.68616e+07	2.48	5.81	0.58	4.11164e+07	3.99565e+07	4.19797e+07	5.08068e+07	5.53296e+07	5.68883e+07	5.67989e+07	5.74011e+07	5.68616e+07	3.99123e+07	3.84907e+07	3.95145e+07	5.08068e+07	5.34116e+07	5.22845e+07	5.41442e+07	5.35702e+07	5.14409e+07	1
			FALSE	Master Protein	Q68FZ8	Propionyl coenzyme A carboxylase, beta polypeptide OS=Rattus norvegicus OX=10116 GN=Pccb PE=1 SV=1	52	FALSE	RAT	23	217	23	541	58.6	7.84	688.66	23	2.052	2.627	6.43811e-06	5.43746e-06	2.05183e+07	5.39112e+07	4.20996e+07	4.16	4.52	3.26	2.14076e+07	1.96998e+07	2.05183e+07	5.29835e+07	5.39112e+07	5.76696e+07	4.00699e+07	4.20996e+07	4.26477e+07	2.07807e+07	1.89771e+07	1.93134e+07	5.29835e+07	5.20423e+07	5.30026e+07	3.81972e+07	3.92899e+07	3.8582e+07	1
			FALSE	Master Protein	pbIG-mScarletI	mScarlet-i	77	FALSE	SEQ	30	210	30	275	31.5	6.84	650.87	30	0.001	0.001	2.63218e-06	6.08188e-06	4.46931e+08	109741	213515	5.16	2.86	29.84	4.1599e+08	4.46931e+08	4.60343e+08	107545	111982		320987	185301	213515	4.03808e+08	4.30536e+08	4.33311e+08	107545	108100		305985	172934	193160	1
			FALSE	Master Protein	P31016	Disks large homolog 4 OS=Rattus norvegicus OX=10116 GN=Dlg4 PE=1 SV=1	44	FALSE	RAT	35	187	32	724	80.4	5.88	584.73	35	641.728	1000			14911.3	4.38733e+07	9.56898e+06		5.68	2.67	14911.3			4.01738e+07	4.47773e+07	4.38733e+07	9.25495e+06	9.758e+06	9.56898e+06	14474.6			4.01738e+07	4.32251e+07	4.03227e+07	8.82239e+06	9.10675e+06	8.65675e+06	1
			FALSE	Master Protein	Q6AYZ1	Tubulin alpha-1C chain OS=Rattus norvegicus OX=10116 GN=Tuba1c PE=1 SV=1	39	FALSE	RAT	16	132	5	449	49.9	5.1	415.38	16	1.074	1.677	0.257241	0.00013321	5.30915e+06	8.90435e+06	5.70156e+06	8.09	1.97	1.98	4.79178e+06	5.63304e+06	5.30915e+06	8.74939e+06	9.10026e+06	8.90435e+06	5.70822e+06	5.51176e+06	5.70156e+06	4.65146e+06	5.42639e+06	4.99738e+06	8.74939e+06	8.78479e+06	8.18374e+06	5.44143e+06	5.14391e+06	5.15802e+06	1
			FALSE	Master Protein	A0A0G2JWX4	Keratin, type II cytoskeletal 2 epidermal OS=Rattus norvegicus OX=10116 GN=Krt2 PE=1 SV=1	15	FALSE	RAT	14	139	1	684	69.1	7.69	407.98	14	0.975	1.631	0.554169	5.43746e-06	1.69304e+06	2.7609e+06	1.64992e+06	0.49	0.19	3.52	1.70322e+06	1.69304e+06	1.68683e+06	2.75947e+06	2.7609e+06	2.76911e+06	1.61247e+06	1.64992e+06	1.72728e+06	1.65334e+06	1.63093e+06	1.58777e+06	2.75947e+06	2.66519e+06	2545010	1.53711e+06	1.5398e+06	1.56261e+06	1
			FALSE	Master Protein	F1LMV6	Desmoplakin OS=Rattus norvegicus OX=10116 GN=Dsp PE=1 SV=1	16	FALSE	RAT	45	157	45	2877	332.2	6.83	396.57	45	14.051	1.847	6.07122e-08	0.000179396	989309	1.82723e+06	1.39004e+07	6.21	7.6	3.72	896992	1.00932e+06	989309	1.63141e+06	1.89172e+06	1.82723e+06	1.31411e+07	1.41102e+07	1.39004e+07	870723	972294	931214	1.63141e+06	1.82614e+06	1.67935e+06	1.25269e+07	1.31685e+07	1.25753e+07	1
			FALSE	Master Protein	A0A0G2K9Q9	Keratin, type I cytoskeletal 17 OS=Rattus norvegicus OX=10116 GN=Krt17 PE=1 SV=1	35	FALSE	RAT	21	139	2	447	49.5	5.11	392.13	21	1000						51162.1			1.66							51182.4	49715.9	51162.1							48790.3	46397.9	46284.7	1
			FALSE	Master Protein	B2GV15	Dihydrolipoamide acetyltransferase component of pyruvate dehydrogenase complex OS=Rattus norvegicus OX=10116 GN=Dbt PE=1 SV=1	37	FALSE	RAT	23	154	23	482	53.2	8.41	391.05	23	16.214	9.5	7.11431e-11	5.36432e-09	2.97592e+06	2.82719e+07	4.82512e+07	6.15	3.59	3.24	3.09002e+06	2.73636e+06	2.97592e+06	2.74808e+07	2.82719e+07	2.95036e+07	4.82512e+07	4.81053e+07	5.09278e+07	2.99953e+06	2.63597e+06	2.80117e+06	2.74808e+07	2.72919e+07	2.71159e+07	45996025	4.48947e+07	4.60728e+07	1
			FALSE	Master Protein	Q6IG05	Keratin, type II cytoskeletal 75 OS=Rattus norvegicus OX=10116 GN=Krt75 PE=3 SV=2	19	FALSE	RAT	16	139	3	542	59	8.07	387.29	16	3.428	0.536	0.00140344	0.0401528	653479	350022	2.23984e+06	18.79	29.57	4.23	615550	653479	863545	347810	350022	564391	2.20427e+06	2.23984e+06	2.38611e+06	597523	629506	812835	347810	337888	518716	2.10125e+06	2.09035e+06	2.15864e+06	1
			FALSE	Master Protein	Q6IFW6	Keratin, type I cytoskeletal 10 OS=Rattus norvegicus OX=10116 GN=Krt10 PE=3 SV=1	17	FALSE	RAT	12	132	1	526	56.5	5.15	384.67	12	0.041	0.278		0.000214873	395286	109923	16117.8	9.03	3.96		453851	395286	384995	104045	112452	109923		16117.8		440560	380786	362387	104045	108554	101027		15042.1		1
			FALSE	Master Protein	Q4FZU2	Keratin, type II cytoskeletal 6A OS=Rattus norvegicus OX=10116 GN=Krt6a PE=1 SV=1	22	FALSE	RAT	16	132	4	552	59.2	7.94	381.58	16	2.927	0.634	3.7847e-06	0.000438432	4.74644e+06	3.00724e+06	1.38943e+07	7.42	2.92	4.48	4.85062e+06	4.74644e+06	4.21394e+06	3.04908e+06	2.88181e+06	3.00724e+06	1.38943e+07	1.33211e+07	1.45683e+07	4.70857e+06	4.57232e+06	3.96648e+06	3.04908e+06	2.78191e+06	2.76387e+06	1.32449e+07	1.2432e+07	1.31795e+07	1
			FALSE	Master Protein	Q6P0K8	Junction plakoglobin OS=Rattus norvegicus OX=10116 GN=Jup PE=1 SV=1	29	FALSE	RAT	19	128	19	745	81.7	6.14	372.92	19	4.84	1.574	1.71336e-11	1.72163e-06	2.08464e+06	3.28126e+06	1.0089e+07	0.88	1.83	1.63	2.08898e+06	2.05546e+06	2.08464e+06	3.28126e+06	3.38161e+06	3.27241e+06	1.0089e+07	9.81709e+06	1.01089e+07	2.0278e+06	1.98006e+06	1.96222e+06	3.28126e+06	3.26439e+06	3.00759e+06	9.61749e+06	9.1619e+06	9.14516e+06	1
			FALSE	Master Protein	P11497	Acetyl-CoA carboxylase 1 OS=Rattus norvegicus OX=10116 GN=Acaca PE=1 SV=1	15	FALSE	RAT	26	129	26	2345	265	6.39	370.66	26	1.287	1.313	0.00352072	0.00189117	2.93263e+06	3.84957e+06	3.77311e+06	7.15	6.27	1.25	3.03832e+06	2.64189e+06	2.93263e+06	3.84957e+06	3.79095e+06	4.2473e+06	3.74197e+06	3.83487e+06	3.77311e+06	2.94934e+06	2.54497e+06	2.76042e+06	3.84957e+06	3.65954e+06	3.90357e+06	3.56708e+06	3.57893e+06	3.41341e+06	1
			FALSE	Master Protein	Q63622	Disks large homolog 2 OS=Rattus norvegicus OX=10116 GN=Dlg2 PE=1 SV=1	37	FALSE	RAT	31	118	26	852	94.9	6.24	364.18	31	1000	1000				2.48723e+07	355262		3.8	15.74				2.39212e+07	2.58108e+07	2.48723e+07	418024	355262	305115				2.39212e+07	2.49161e+07	2.28595e+07	398487	331552	276028	1
			FALSE	Master Protein	Q5XIF6	Tubulin alpha-4A chain OS=Rattus norvegicus OX=10116 GN=Tuba4a PE=1 SV=1	46	FALSE	RAT	17	113	6	448	49.9	5.06	355.79	17	1.346	2.252	0.0106624	0.000166011	1.95668e+06	4.40561e+06	2.63311e+06	11.58	5.15	5.22	1.64675e+06	1.95668e+06	2.06971e+06	4.0369e+06	4.40561e+06	4.4329e+06	2.4262e+06	2.67866e+06	2.63311e+06	1.59852e+06	1.8849e+06	1.94817e+06	4.0369e+06	4.25289e+06	4.07416e+06	2.31281e+06	2.49989e+06	2.38209e+06	1
			FALSE	Master Protein	A0A0G2JZQ9	Keratin, type II cytoskeletal 1b OS=Rattus norvegicus OX=10116 GN=Krt77 PE=3 SV=1	13	FALSE	RAT	11	123	3	579	62	7.55	348.48	11	1.759	0.937	0.000161345	0.199107	435284	407849	765573	7.68	3.08	5.97	426720	490477	435284	395727	420857	407849	765573	821740	730281	414223	472484	409723	395727	406268	374843	729791	766898	660662	1
			FALSE	Master Protein	Q6IFU7	Keratin, type I cytoskeletal 42 OS=Rattus norvegicus OX=10116 GN=Krt42 PE=3 SV=1	26	FALSE	RAT	14	112	7	452	50.2	5.16	319.48	14	1.269	1.659	0.000449681	2.26054e-05	5.49245e+06	9.1116e+06	6.96842e+06	1.69	4.53	1.58	5.43331e+06	5.6159e+06	5.49245e+06	9.25708e+06	8.49279e+06	9.1116e+06	6.96842e+06	6.97437e+06	6.78247e+06	5.27419e+06	5.40989e+06	5.16992e+06	9.25708e+06	8.19839e+06	8.37422e+06	6.64273e+06	6.5089e+06	6.13588e+06	1
			FALSE	Master Protein	Q10758	Keratin, type II cytoskeletal 8 OS=Rattus norvegicus OX=10116 GN=Krt8 PE=1 SV=3	9	FALSE	RAT	9	101	1	483	54	6	271.08	9	1.351	1.737	0.0014481	0.000166011	3.45285e+06	5.99653e+06	4.66477e+06	5.68	3.97	7.18	3.45285e+06	3.53531e+06	3.16878e+06	5869482	6.33574e+06	5.99653e+06	4.53173e+06	4.66477e+06	5.1835e+06	3351733	3405616	2.98271e+06	5869482	6116105	5.51124e+06	4.31992e+06	4.35344e+06	4689346	1
			FALSE	Master Protein	Q6IFU9	Keratin 16 OS=Rattus norvegicus OX=10116 GN=Krt16 PE=1 SV=1	17	FALSE	RAT	9	87	5	463	50.7	5.12	265.51	9	1.496	1.285	0.00214153	0.00858896	2.11915e+06	2.72401e+06	3.1706e+06	1.23	12.81	2	2.11915e+06	2.0873e+06	2.13888e+06	2.60227e+06	2.72401e+06	3.29169e+06	3.1706e+06	3.10949e+06	3.23611e+06	2.05709e+06	2.01073e+06	2.01328e+06	2.60227e+06	2.62958e+06	3.0253e+06	3.02241e+06	2.90196e+06	2.92761e+06	1
			FALSE	Master Protein	A0A0G2K3K2	Actin, cytoplasmic 1 OS=Rattus norvegicus OX=10116 GN=Actb PE=1 SV=1	35	FALSE	RAT	10	91	10	378	42.1	5.48	262.6	10	2.502	1.255	1.54662e-05	0.0135672	2.50397e+06	3.14341e+06	6.26509e+06	10.74	3.35	0.98	2.7236e+06	2.50397e+06	2.19484e+06	3.04178e+06	3.14341e+06	3.25231e+06	6.18396e+06	6.26509e+06	6.30331e+06	2.64384e+06	2.41211e+06	2.06596e+06	3.04178e+06	3.03444e+06	2.98911e+06	5.89493e+06	5.84696e+06	5.70241e+06	1
			FALSE	Master Protein	P11275	Calcium/calmodulin-dependent protein kinase type II subunit alpha OS=Rattus norvegicus OX=10116 GN=Camk2a PE=1 SV=1	38	FALSE	RAT	17	61	11	478	54.1	7.08	175.87	17	12.033	117.121	6.43811e-06	1.00093e-06	80201.8	9.39334e+06	965103	22.87	3.45	3.6	54604	86425.1	80201.8	8.89006e+06	9.48225e+06	9.39334e+06	982672	965103	916321	53004.9	83254.6	75492.1	8.89006e+06	9.15354e+06	8.63316e+06	936744	900692	828966	1
			FALSE	Master Protein	P63018	Heat shock cognate 71 kDa protein OS=Rattus norvegicus OX=10116 GN=Hspa8 PE=1 SV=1	17	FALSE	RAT	10	63	5	646	70.8	5.52	171.26	10	2.439	5.335	0.000246067	2.26054e-05	257343	1.37283e+06	627723	16.5	7.4	1.47	219543	257343	305383	1.22843e+06	1.37283e+06	1.41828e+06	624626	627723	642079	213114	247903	287450	1.22843e+06	1.32524e+06	1.3035e+06	595433	585829	580868	1
			FALSE	Master Protein	G3V9G3	Calcium/calmodulin-dependent protein kinase II, beta, isoform CRA_a OS=Rattus norvegicus OX=10116 GN=Camk2b PE=1 SV=1	31	FALSE	RAT	13	55	7	542	60.4	7.28	164.17	13	6.718	120.22			16710.1	2.0089e+06	112253		8.9	12.67			16710.1	1.73761e+06	2.05666e+06	2.0089e+06	91096.2	116190	112253			15728.9	1.73761e+06	1.98536e+06	1.84633e+06	86838.6	108435	101551	1
			FALSE	Master Protein	P85108	Tubulin beta-2A chain OS=Rattus norvegicus OX=10116 GN=Tubb2a PE=1 SV=1	31	FALSE	RAT	11	51	2	445	49.9	4.89	152.53	11	1.907	5.422	0.00539279	5.41707e-05	260022	1.40995e+06	495967	10.16	3.99	19.22	260022	250952	302563	1.40995e+06	1.40131e+06	1.50487e+06	495967	397020	586505	252407	241746	284796	1.40995e+06	1.35273e+06	1.38308e+06	472787	370523	530593	1
			FALSE	Master Protein	F1LNM0	Disks large homolog 1 OS=Rattus norvegicus OX=10116 GN=Dlg1 PE=1 SV=1	16	FALSE	RAT	14	48	7	911	100.5	5.95	148.59	14	1.47	104.666	0.00815292	9.81082e-12	10906.8	1.14158e+06	16036.7	6.41	2.4	8.88	11413.2	10423		1.10838e+06	1.14158e+06	1.16247e+06	17077.7	15059.3		11078.9	10040.6		1.10838e+06	1.102e+06	1.0684e+06	16279.5	14054.2		1
			FALSE	Master Protein	Q6IFZ5	Keratin 76 OS=Rattus norvegicus OX=10116 GN=Krt76 PE=2 SV=1	9	FALSE	RAT	6	52	1	581	61.7	8.38	140.69	6	0.111	0.175	6.26214e-05	0.000147001	254919	44562.9	28352.4	5.8	14.58	19.87	248723	254919	277428	44562.9	44907.9	34316.7		24613.8	32658.9	241439	245568	261137	44562.9	43351.1	31539.5		22971.1	29545.5	1
			FALSE	Master Protein	P04797	Glyceraldehyde-3-phosphate dehydrogenase OS=Rattus norvegicus OX=10116 GN=Gapdh PE=1 SV=3	27	FALSE	RAT	6	43	5	333	35.8	8.03	135.87	6	1.811	3.777	0.0044175	0.00010041	526459	1.98865e+06	953551	19.01	5.19	2.99	670638	526459	465430	1.83862e+06	1.98865e+06	2.03183e+06	953804	905174	953551	650998	507146	438099	1.83862e+06	1.91972e+06	1.8674e+06	909226	844763	862647	1
			FALSE	Master Protein	M0R5P8	ADAM metallopeptidase domain 22 OS=Rattus norvegicus OX=10116 GN=Adam22 PE=1 SV=2	22	FALSE	RAT	14	47	14	775	85.6	7.84	135.54	14	38.221	726.129			8343.8	6.05867e+06	318908		5.21	14.81	8343.8			5.54227e+06	6.05867e+06	6.08918e+06	318908	257539	346530	8099.45			5.54227e+06	5.84865e+06	5.5964e+06	304003	240351	313495	1
			FALSE	Master Protein	A0A0G2JXH6	Keratin, type II cytoskeletal 73 OS=Rattus norvegicus OX=10116 GN=Krt73 PE=1 SV=1	8	FALSE	RAT	5	48	1	539	58.7	7.94	132.49	5	0.043	0.131	4.97455e-05	0.000339616	145693	19097.5	6305.56	12.31	8.8	32.99	117500	145693	147620	19097.5	21479.3	18131.9		7997.34	4971.67	114059	140348	138952	19097.5	20734.7	16664.5		7463.6	4497.71	1
			FALSE	Master Protein	Q3KRE8	Tubulin beta-2B chain OS=Rattus norvegicus OX=10116 GN=Tubb2b PE=1 SV=1	31	FALSE	RAT	10	41	1	445	49.9	4.89	113.89	10	1000	1000				259033	119431		10.35	17.36				240217	294168	259033	119431	100206	142003				240217	283970	238070	113849	93518.3	128466	1
			FALSE	Master Protein	P69897	Tubulin beta-5 chain OS=Rattus norvegicus OX=10116 GN=Tubb5 PE=1 SV=1	28	FALSE	RAT	9	40	2	444	49.6	4.89	109.01	9	19.432	44.949	2.19936e-06	1.7245e-06	18328	823831	356153	19.29	4.37	6.71	13362.9	19607.3	18328	815531	882982	823831	318450	360593	356153	12971.6	18888	17251.7	815531	852373	757160	303566	336527	322200	1
			FALSE	Master Protein	B4F7C2	Tubulin beta chain OS=Rattus norvegicus OX=10116 GN=Tubb4a PE=1 SV=1	27	FALSE	RAT	8	36	1	444	49.6	4.88	107.32	8	2.378	4.834	4.80484e-06	8.86807e-07	59733.5	288741	142067	3.93	4.16	5.19	57021.6	61668.9	59733.5	270801	293138	288741	134166	142067	148865	55351.7	59406.6	56225.8	270801	282977	265374	127896	132586	134674	1
			FALSE	Master Protein	pbIG-Xph0-ETWV	Xph0-ETWV	32	FALSE	SEQ	4	30	2	187	18.8	6.92	106.89	4		1000				1.02216e+08			4.35					9.92016e+07	1.08021e+08	1.02216e+08							9.92016e+07	1.04276e+08	9.39444e+07				1
			FALSE	Master Protein	Q8K4Y5	Leucine-rich glioma-inactivated protein 1 OS=Rattus norvegicus OX=10116 GN=Lgi1 PE=1 SV=1	26	FALSE	RAT	13	42	13	557	63.7	8.02	106.75	13	1000	1000				5.1681e+06	344695		5.05	10.77				4.98491e+06	5.1681e+06	5.50431e+06	344695	380074	306110				4.98491e+06	4.98895e+06	5.05886e+06	328585	354708	276928	1
			FALSE	Master Protein	P11730	Calcium/calmodulin-dependent protein kinase type II subunit gamma OS=Rattus norvegicus OX=10116 GN=Camk2g PE=1 SV=1	24	FALSE	RAT	9	34	3	527	59	7.71	105.82	9		1000				162287			25.48					123221	206790	162287							123221	199622	149153				1
			FALSE	Master Protein	P14659	Heat shock-related 70 kDa protein 2 OS=Rattus norvegicus OX=10116 GN=Hspa2 PE=1 SV=2	11	FALSE	RAT	6	38	1	633	69.6	5.67	102.48	6	1000						20469.1			12.33								22339.3	18755.4								20848.4	16967.4	1
			FALSE	Master Protein	Q4QRB4	Tubulin beta-3 chain OS=Rattus norvegicus OX=10116 GN=Tubb3 PE=1 SV=1	17	FALSE	RAT	6	38	2	450	50.4	4.93	99.42	6	3.089	7.381	0.0135486	0.00140586	97003.5	715969	299612	44.8	3.51	19.71	69874	134666		691973	715969	742200	354431	237372	299612	67827.8	129726		691973	691150	682135	337866	221530	271050	1
			FALSE	Master Protein	P15791	Calcium/calmodulin-dependent protein kinase type II subunit delta OS=Rattus norvegicus OX=10116 GN=Camk2d PE=1 SV=1	14	FALSE	RAT	7	31	1	533	60	7.27	92.41	7		1000				30789.2			3.05					29967.8	30789.2	31845.4							29967.8	29721.8	29268.2				1
			FALSE	Master Protein	G3V7C6	Tubulin beta chain OS=Rattus norvegicus OX=10116 GN=Tubb4b PE=1 SV=2	24	FALSE	RAT	9	32	1	548	61.1	4.86	89.78	9	2.891	6.841	0.021443	0.000945792	113929	779406	329350	42.36	13.9	22.41	113929	66664.7	163958	779406	975187	766944	218649	336540	329350	110592	64219.2	154330	779406	941382	704877	208429	314080	297953	1
			FALSE	Master Protein	G3V746	Glutamate receptor ionotropic, NMDA 2B OS=Rattus norvegicus OX=10116 GN=Grin2b PE=1 SV=1	8	FALSE	RAT	10	31	10	1482	165.9	6.87	89.45	10	1.162	65.888		1.315e-13	26410.9	1.74017e+06	30684.2	8.85	1.1		24806.6	28119.1		1.74017e+06	1.7087e+06	1.74278e+06			30684.2	24080.1	27087.5		1.74017e+06	1.64947e+06	1.60174e+06			27759.1	1
			FALSE	Master Protein	P06761	Endoplasmic reticulum chaperone BiP OS=Rattus norvegicus OX=10116 GN=Hspa5 PE=1 SV=1	11	FALSE	RAT	5	24	4	654	72.3	5.16	76.19	5	4.303	1.217	0.000334936	0.476324	128267	156119	551922	21.79	22.2	5.63	130691	128267	86121.8	105801	156119	163825	577124	515762	551922	126864	123562	81064.5	105801	150707	150567	550151	481341	499306	1
			FALSE	Master Protein	P10719	ATP synthase subunit beta, mitochondrial OS=Rattus norvegicus OX=10116 GN=Atp5f1b PE=1 SV=2	11	FALSE	RAT	4	24	4	529	56.3	5.34	68.83	4	1.927	1.239	0.00646448	0.857873	288920	357892	556791	16.49	13.24	8.26	377342	288920	284826	284558	364797	357892	510720	602670	556791	366292	278321	268101	284558	352152	328928	486850	562449	503711	1
			FALSE	Master Protein	F1LQW8	Ras/Rap GTPase-activating protein SynGAP OS=Rattus norvegicus OX=10116 GN=Syngap1 PE=1 SV=2	9	FALSE	RAT	9	19	9	1308	144.5	9.01	61.73	9		1000				831683			5.53					831683	862725	773116							831683	832818	710550				1
			FALSE	Master Protein	Q07936	Annexin A2 OS=Rattus norvegicus OX=10116 GN=Anxa2 PE=1 SV=2	18	FALSE	RAT	5	20	5	339	38.7	7.69	59.41	5	2.944	1.129	0.000121947	0.29917	525687	593598	1.54773e+06	8.51	15.86	6.53	598600	525687	512387	593598	754648	567690	1.54773e+06	1.45882e+06	1.66138e+06	581070	506402	482298	593598	728488	521749	1.47539e+06	1.36146e+06	1.503e+06	1
			FALSE	Master Protein	pbIG-Xph20-ETWV	Xph20-ETWV	19	FALSE	SEQ	3	17	1	184	18.6	7.12	57	3	1000						3.54128e+06			5.3							3.22807e+06	3.54128e+06	3.54629e+06							3.07719e+06	3.30494e+06	3.20821e+06	1
			FALSE	Master Protein	P06686	Sodium/potassium-transporting ATPase subunit alpha-2 OS=Rattus norvegicus OX=10116 GN=Atp1a2 PE=1 SV=1	9	FALSE	RAT	7	20	7	1020	112.1	5.55	56.99	7	1.45	2.012	0.00844355	0.000512677	446527	898372	647313	14.53	2.8	8.84	347382	457265	446527	898372	893993	940212	570618	679501	647313	337209	440490	420305	898372	863002	864123	543949	634152	585603	1
			FALSE	Master Protein	A0A0G2K7N1	Keratin, type II cytoskeletal 72 OS=Rattus norvegicus OX=10116 GN=Krt72 PE=3 SV=1	7	FALSE	RAT	3	20	1	553	60.4	7.59	56.54	3	0.99	2.539	0.99584	0.00439638	439619	1.11632e+06	435441	10.98	33.1	9.81	478515	439619	383748	870915	1.11632e+06	1.65687e+06	381930	464541	435441	464502	423492	361213	870915	1.07762e+06	1.52278e+06	364080	433538	393929	1
			FALSE	Master Protein	P0DMW0	Heat shock 70 kDa protein 1A OS=Rattus norvegicus OX=10116 GN=Hspa1a PE=2 SV=1	12	FALSE	RAT	5	20	3	641	70.1	5.82	55.33	5	1000						42732.2			9.08							42732.2	36971.3	43994.3							40735	34503.9	39800.3	1
			FALSE	Master Protein	O55164	Multiple PDZ domain protein OS=Rattus norvegicus OX=10116 GN=Mpdz PE=1 SV=1	4	FALSE	RAT	7	18	7	2054	218.5	5.05	54.8	7		1000				333669			3.75					330618	333669	354059							330618	322103	325406				1
			FALSE	Master Protein	F1M2J2	Ankyrin repeat and sterile alpha motif domain-containing protein 1B OS=Rattus norvegicus OX=10116 GN=Anks1b PE=1 SV=3	5	FALSE	RAT	5	16	5	1216	134.8	6.33	49.14	5	1000	1000				491373	9294.17		2.31					501253	478644	491373		9294.17					501253	462052	451608		8673.88		1
			FALSE	Master Protein	D4A9Q2	Angiomotin OS=Rattus norvegicus OX=10116 GN=Amot PE=1 SV=2	8	FALSE	RAT	7	17	6	1131	121.2	7.5	48.88	7		1000				823015			3.41					782508	835587	823015							782508	806621	756410				1
			FALSE	Master Protein	Q62648	Glutamate receptor ionotropic, NMDA 1 OS=Rattus norvegicus OX=10116 GN=Grin1 PE=1 SV=1	8	FALSE	RAT	7	16	7	943	106.1	8.79	48.17	7	1000	1000				2.08809e+06	19780.7		5.39					2.02654e+06	2.08809e+06	2.24783e+06		19780.7					2.02654e+06	2.01571e+06	2.06592e+06		18460.6		1
			FALSE	Master Protein	A0A0G2JUR6	Keratin 78 (Fragment) OS=Rattus norvegicus OX=10116 GN=Krt78 PE=3 SV=1	6	FALSE	RAT	2	18	1	428	48.6	5.45	47.95	2	1.622	1.165	0.246892	0.608502	51873.3	60418	84131.3	66.86	14.85	11.94	13173.8	51873.3	74895.2	49887.7	67346.3	60418	75800.5	84131.3	96073.9	12788	49970.4	70497.1	49887.7	65011.7	55528.6	72257.8	78516.4	86915	1
			FALSE	Master Protein	P31000	Vimentin OS=Rattus norvegicus OX=10116 GN=Vim PE=1 SV=2	6	FALSE	RAT	2	13	1	466	53.7	5.12	43.76	2	0.162	0.272	0.00029823	0.00117645	179879	48851.6	29149.6	34.14	17.56	6.61	266720	179879	136423	48851.6	49561.5	35627.9	31588.1	29149.6	27733.2	258909	173281	128412	48851.6	47843.4	32744.6	30111.7	27204.2	25089.3	1
			FALSE	Master Protein	F1LP05	ATP synthase subunit alpha OS=Rattus norvegicus OX=10116 GN=Atp5f1a PE=1 SV=1	11	FALSE	RAT	4	14	4	553	59.8	9.26	38.92	4	3.053	4.896	0.00184286	0.000384011	91436.6	447698	279111	30.07	7.9	9.42	91436.6	142743	84210.2	447698	439917	507090	279111	265758	317889	88758.8	137507	79265.2	447698	424667	466052	266066	248022	287584	1
			FALSE	Master Protein	P97836	Disks large-associated protein 1 OS=Rattus norvegicus OX=10116 GN=Dlgap1 PE=1 SV=1	6	FALSE	RAT	5	13	5	992	110.1	7.24	36	5		1000				582099			4.62					582099	584206	537726							582099	563954	494209				1
			FALSE	Master Protein	F1M4G6	Uncharacterized protein OS=Rattus norvegicus OX=10116 PE=3 SV=1	7	FALSE	RAT	2	12	1	319	34	7.87	35.96	2	3.777	1.534	1.05307e-05	0.00384358	73946.6	113454	279277	12.49	4.11	7.19	85914.4	73946.6	67251.2	112822	113454	121378	258324	279277	298403	83398.4	71234	63302.1	112822	109521	111555	246251	260638	269956	1
			FALSE	Master Protein	P59215	Guanine nucleotide-binding protein G(o) subunit alpha OS=Rattus norvegicus OX=10116 GN=Gnao1 PE=1 SV=2	7	FALSE	RAT	2	12	2	354	40	5.53	35.52	2	1.435	2.465	0.0102774	0.000217992	152926	377028	219523	9.92	4.19	12.42	163232	152926	133900	377028	357487	388501	191154	219523	245451	158452	147316	126037	377028	345095	357060	182220	204872	222052	1
			FALSE	Master Protein	A0A0G2K9N0	Small ArfGAP2 OS=Rattus norvegicus OX=10116 GN=Smap2 PE=1 SV=1	10	FALSE	RAT	3	11	3	397	43.2	9.16	30.37	3	0.998	1.788	0.77015	0.0401528	137699	246141	137467	38.29	4.46	7.21	137699	167206	72924.3	246141	252455	231312	148947	129045	137467	133666	161073	68642	246141	243704	212592	141986	120433	124362	1
			FALSE	Master Protein	D4A817	Histone H2B OS=Rattus norvegicus OX=10116 GN=Hist2h2be PE=3 SV=3	33	FALSE	RAT	4	12	4	126	14	10.32	30.32	4	14.354	0.723	7.05849e-06	0.0424629	173909	125755	2.49632e+06	22.33	15.45	5.57	235213	173909	154865	125755	100615	137217	2.72323e+06	2.49632e+06	2.46023e+06	228324	167530	145771	125755	97127.5	126113	2.59595e+06	2.32972e+06	2.22569e+06	1
			FALSE	Master Protein	M0R757	Elongation factor 1-alpha OS=Rattus norvegicus OX=10116 GN=LOC100360413 PE=3 SV=1	5	FALSE	RAT	2	11	2	462	50.1	9.01	28.35	2	3.686	1.705	2.19936e-06	0.000166011	339895	579626	1.25294e+06	2	9.09	1.39	341581	329131	339895	533866	639825	579626	1.23146e+06	1.25294e+06	1.26594e+06	331578	317058	319936	533866	617645	532718	1.17391e+06	1.16932e+06	1.14526e+06	1
			FALSE	Master Protein	D3ZY51	Plakophilin 1 OS=Rattus norvegicus OX=10116 GN=Pkp1 PE=4 SV=2	6	FALSE	RAT	3	8	3	605	67.2	8.7	27.13	3	33.51	0.001	1.1324e-07		68525.5		2.2963e+06	6.72		8.23	68525.5	61945.7	70558.3				2.20533e+06	2.57771e+06	2.2963e+06	66518.7	59673.2	66414.9				2.10226e+06	2.40568e+06	2.07739e+06	1
			FALSE	Master Protein	A0A0H2UI35	Homer protein homolog 1 OS=Rattus norvegicus OX=10116 GN=Homer1 PE=1 SV=1	11	FALSE	RAT	4	11	4	366	41.4	5.63	26.89	4		1000				458122			7.17					471059	410299	458122							471059	396076	421047				1
			FALSE	Master Protein	G3V9A3	RCG31390 OS=Rattus norvegicus OX=10116 GN=Sfn PE=3 SV=1	13	FALSE	RAT	3	8	3	248	27.7	4.78	26.77	3	38.725	0.276			42855.3	11833	1.65956e+06			7.13	42855.3			11833			1.75325e+06	1.52028e+06	1.65956e+06	41600.3			11833			1.6713e+06	1.41882e+06	1.50135e+06	1
			FALSE	Master Protein	M0R805	SH3 and multiple ankyrin repeat domains protein 2-like OS=Rattus norvegicus OX=10116 GN=LOC103690160 PE=1 SV=1	5	FALSE	RAT	3	8	3	1167	125	6.42	25.82	3		1000				43842.5			24.43					34015	55744.6	43842.5							34015	53812.2	40294.4				1
			FALSE	Master Protein	Q9JKB7	Guanine deaminase OS=Rattus norvegicus OX=10116 GN=Gda PE=1 SV=1	8	FALSE	RAT	3	8	3	454	50.9	5.72	24.63	3	1000	1000				555100	21105		2.04	6.73				551976	555100	573105	21325.9	18841.2	21105				551976	535858	526725	20329.2	17583.7	19093	1
			FALSE	Master Protein	P07150	Annexin A1 OS=Rattus norvegicus OX=10116 GN=Anxa1 PE=1 SV=2	8	FALSE	RAT	2	8	2	346	38.8	7.34	24.11	2	7.313	0.001	8.40719e-05		20940.1		153134	1.99		9.32	21237.6		20646.8				167652	139079	153134	20615.6		19434.3				159816	129797	138535	1
			FALSE	Master Protein	A0A0U1RS13	SH3 and multiple ankyrin repeat domains protein 3 (Fragment) OS=Rattus norvegicus OX=10116 GN=Shank3 PE=1 SV=2	3	FALSE	RAT	3	8	3	1646	174.8	8.54	23.32	3		1000				160045			16.95					160045	169444	121378							160045	163570	111555				1
			FALSE	Master Protein	P62804	Histone H4 OS=Rattus norvegicus OX=10116 GN=Hist1h4b PE=1 SV=2	31	FALSE	RAT	3	9	3	103	11.4	11.36	22.88	3	9.379	0.624			20913.1	13059.8	196134		26.26	14.92	20913.1			15758.4		10823.4	196134	233726	174313	20300.6			15758.4		9947.48	186967	218128	157696	1
			FALSE	Master Protein	P48500	Triosephosphate isomerase OS=Rattus norvegicus OX=10116 GN=Tpi1 PE=1 SV=2	11	FALSE	RAT	2	8	2	249	26.8	7.24	21.87	2	6.913	0.874	0.000110505	0.777277	18486.3	16164.5	127789	15.19	19.95	23.69	17549.4	18486.3	23142.7	16164.5	21709.3	15159.1	127789	108701	171550	17035.4	17808.2	21783.7	16164.5	20956.8	13932.4	121816	101447	155196	1
			FALSE	Master Protein	Q6IMF1	Keratin, type II cytoskeletal 80 OS=Rattus norvegicus OX=10116 GN=Krt80 PE=3 SV=1	2	FALSE	RAT	1	9	1	452	50.5	6.2	21.21	1	1.795	1.204	0.000502132	0.0784987	217999	262527	391365	6.27	9.09	5.83	239185	217999	212748	241069	262527	288993	391365	397376	356202	232181	210002	200255	241069	253427	265605	373074	370855	322245	1
			FALSE	Master Protein	M0R5J4	Uncharacterized protein OS=Rattus norvegicus OX=10116 PE=3 SV=1	12	FALSE	RAT	4	7	4	434	47	6.37	19.99	4	3.522	0.001	0.132642		88642.4		312186	91.96		9.03	192543	40808.9					287582	312186	344272	186904	39311.8					274141	291351	311452	1
			FALSE	Master Protein	P63039	60 kDa heat shock protein, mitochondrial OS=Rattus norvegicus OX=10116 GN=Hspd1 PE=1 SV=1	8	FALSE	RAT	2	6	2	573	60.9	6.18	19.07	2	0.001	0.001			10460.4						10460.4									10154									1
			FALSE	Master Protein	A0A0G2JXR9	Membrane-associated guanylate kinase, WW and PDZ domain-containing protein 2 OS=Rattus norvegicus OX=10116 GN=Magi2 PE=1 SV=1	4	FALSE	RAT	3	7	3	1082	119.3	5.97	18.5	3		1000				160659			11.13					160659	187082	151390							160659	180597	139138				1
			FALSE	Master Protein	P85834	Elongation factor Tu, mitochondrial OS=Rattus norvegicus OX=10116 GN=Tufm PE=1 SV=1	3	FALSE	RAT	1	6	1	452	49.5	7.56	18.42	1		1000				34537.9			22.07					25233.9	39661.1	34537.9							25233.9	38286.2	31742.9				1
			FALSE	Master Protein	P13233	2',3'-cyclic-nucleotide 3'-phosphodiesterase OS=Rattus norvegicus OX=10116 GN=Cnp PE=1 SV=2	11	FALSE	RAT	4	7	4	420	47.2	8.9	18.32	4	1.555	4.279	0.525215	0.0110545	23690.5	101372	36837.4	38.14	13.65	34.59		31236.4	17967.5	93388.9	101372	121318	45760.6	21911.2	36837.4		30090.5	16912.4	93388.9	97858.2	111500	43621.8	20448.9	33325.6	1
			FALSE	Master Protein	P42123	L-lactate dehydrogenase B chain OS=Rattus norvegicus OX=10116 GN=Ldhb PE=1 SV=2	6	FALSE	RAT	1	5	1	334	36.6	6.05	16.95	1	0.001	0.001			77550.1			77.15			159144	77550.1	25411.5							154483	74705.2	23919.3							1
			FALSE	Master Protein	P47819	Glial fibrillary acidic protein OS=Rattus norvegicus OX=10116 GN=Gfap PE=1 SV=2	4	FALSE	RAT	1	5	1	430	49.9	5.44	16.89	1	0.001	2.236		0.326016	45991.4	102819		57.81	39.41		107597	40212.6	45991.4	77222.6	136899					104446	38737.5	43290.7	77222.6	132153					1
			FALSE	Master Protein	D3ZQ18	Non-specific cytotoxic cell receptor protein 1 homolog (zebrafish) OS=Rattus norvegicus OX=10116 GN=Nccrp1 PE=4 SV=1	4	FALSE	RAT	1	6	1	291	33	6.54	16.1	1	2.106	0.826	0.00184286	0.115998	53232.8	43976.2	112095	11.75	11	12.83	60355.1	53232.8	47755.3	45228.7	43976.2	36680.5	119731	92797.7	112095	58587.6	51279.9	44951	45228.7	42451.7	33712.1	114135	86604.4	101409	1
			FALSE	Master Protein	A0A0G2K0E5	Brain-enriched guanylate kinase-associated protein OS=Rattus norvegicus OX=10116 GN=Begain PE=1 SV=1	5	FALSE	RAT	2	4	2	611	66.7	5.87	15.43	2	1000	1000				197700	11272.7		8.39					197700	219301	186056			11272.7				197700	211699	170999			10198	1
			FALSE	Master Protein	F1LZQ6	Angiomotin-like 1 OS=Rattus norvegicus OX=10116 GN=Amotl1 PE=1 SV=3	3	FALSE	RAT	2	5	1	967	108	8.34	14.86	2		1000				28330.3			4.82					27590.4	28330.3	30272.4							27590.4	27348.3	27822.6				1
			FALSE	Master Protein	Q00959	Glutamate receptor ionotropic, NMDA 2A OS=Rattus norvegicus OX=10116 GN=Grin2a PE=1 SV=2	2	FALSE	RAT	2	5	2	1464	165.4	7.05	11.78	2		1000				280418			8.39					257127	280418	304185							257127	270697	279568				1
			FALSE	Master Protein	P19527	Neurofilament light polypeptide OS=Rattus norvegicus OX=10116 GN=Nefl PE=1 SV=3	5	FALSE	RAT	2	4	2	542	61.3	4.65	11.71	2	1000	1000				23555.3	12175.8		4.67					23555.3	23013.5	25158.7		12175.8					23555.3	22215.7	23122.7		11363.2		1
			FALSE	Master Protein	A0A0G2JZX5	IQ motif and Sec7 domain 2 OS=Rattus norvegicus OX=10116 GN=Iqsec2 PE=1 SV=1	4	FALSE	RAT	3	4	3	949	105.1	7.24	11.54	3		1000				113574			18.01					85709.7	113574	122867							85709.7	109637	112923				1
			FALSE	Master Protein	D4A5U3	Protein-glutamine gamma-glutamyltransferase E OS=Rattus norvegicus OX=10116 GN=Tgm3 PE=3 SV=1	2	FALSE	RAT	1	4	1	693	77.2	6.89	10.89	1	1.899	0.001	0.00058957		39316.4		74665.2	6.71		6.71	38170	39316.4	43320.2				82525.5	72834.4	74665.2	37052.1	37874.1	40776.3				78668.4	67973.4	67547.3	1
			FALSE	Master Protein	P49242	40S ribosomal protein S3a OS=Rattus norvegicus OX=10116 GN=Rps3a PE=1 SV=2	6	FALSE	RAT	1	3	1	264	29.9	9.73	9.99	1	0.001	0.001			19300.3			89.97			56312.5	19300.3	8280.86							54663.4	18592.2	7794.59							1
			FALSE	Master Protein	P07335	Creatine kinase B-type OS=Rattus norvegicus OX=10116 GN=Ckb PE=1 SV=2	3	FALSE	RAT	1	3	1	381	42.7	5.67	9.95	1	1000						117224			21.27							106822	117224	158082							101829	109400	143012	1
			FALSE	Master Protein	A0A0G2K1J5	Plectin OS=Rattus norvegicus OX=10116 GN=Plec PE=1 SV=1	0	FALSE	RAT	1	5	1	4387	498.9	5.66	9.58	1	1.738	1.676	0.00646448	0.018913	148810	249471	258673	15.6	9.11	14.42	148810	179853	132650	249471	252296	213336	241228	316168	258673	144452	173255	124860	249471	243550	196071	229953	295067	234013	1
			FALSE	Master Protein	Q9JHY2	Sideroflexin-3 OS=Rattus norvegicus OX=10116 GN=Sfxn3 PE=2 SV=1	5	FALSE	RAT	1	4	1	321	35.4	9.74	9.52	1	1000	1000				43014.4	17476.4		37.55					43014.4	43769.8	20208.5			17476.4				43014.4	42252.5	18573			15810.3	1
			FALSE	Master Protein	G3V8L3	Lamin A, isoform CRA_b OS=Rattus norvegicus OX=10116 GN=Lmna PE=1 SV=1	2	FALSE	RAT	1	4	1	665	74.3	6.98	9.5	1	1000						44867										44867									42770			1
			FALSE	Master Protein	A7VJC2	Heterogeneous nuclear ribonucleoproteins A2/B1 OS=Rattus norvegicus OX=10116 GN=Hnrnpa2b1 PE=1 SV=1	5	FALSE	RAT	1	3	1	353	37.5	8.95	9.27	1	0.001	0.001			14993.3			69.49			35224.7	14993.3	9038.65							34193.1	14443.3	8507.88							1
			FALSE	Master Protein	Q02563	Synaptic vesicle glycoprotein 2A OS=Rattus norvegicus OX=10116 GN=Sv2a PE=1 SV=2	2	FALSE	RAT	1	3	1	742	82.6	5.57	9.25	1	1.608	3.343	0.0400916	0.000470114	15574.5	52067.4	25037	17.53	12.24	15.05	20742.3	15574.5	15436.2	47975.5	60820.1	52067.4	22482.5	30134.1	25037	20134.9	15003.1	14529.8	47975.5	58711.7	47853.7	21431.7	28123	22650.2	1
			FALSE	Master Protein	B2RZD6	NDUFA4, mitochondrial complex-associated OS=Rattus norvegicus OX=10116 GN=Ndufa4 PE=1 SV=1	27	FALSE	RAT	2	4	2	82	9.3	9.52	8.66	2	1000	1000				126146	52006.1		23.65	71.28				126146	85482	138053	29864	90565					126146	82518.7	126881	28468.2	84520.8		1
			FALSE	Master Protein	A0A0G2K6U1	Vesicle-fusing ATPase OS=Rattus norvegicus OX=10116 GN=Nsf PE=1 SV=1	2	FALSE	RAT	1	3	1	744	82.6	6.95	8.63	1	1000	1000				48935.2	27575.6		11.83	2.62				48935.2	43928.5	55598.4	27070	28090.5					48935.2	42405.7	51099	25804.8	26215.8		1
			FALSE	Master Protein	P70587	Leucine-rich repeat-containing protein 7 OS=Rattus norvegicus OX=10116 GN=Lrrc7 PE=1 SV=2	2	FALSE	RAT	2	3	2	1490	166.8	6.61	8.37	2		1000				78244.4			14.48					78244.4	76375	98397.7							78244.4	73727.4	90434.6				1
			FALSE	Master Protein	Q63648	Merlin (Fragment) OS=Rattus norvegicus OX=10116 GN=Nf2 PE=1 SV=1	2	FALSE	RAT	1	3	1	586	68.7	6.58	8.34	1		1000				83649.4			9.98					83649.4	95197.5	78470.7							83649.4	91897.5	72120.2				1
			FALSE	Master Protein	Q5U300	Ubiquitin-like modifier-activating enzyme 1 OS=Rattus norvegicus OX=10116 GN=Uba1 PE=1 SV=1	1	FALSE	RAT	1	3	1	1058	117.7	5.57	8.25	1	1000						43697.2			22.84							43697.2	33393.7	53227.5							41654.9	31165	48153.2	1
			FALSE	Master Protein	Q4FZT6	Histone H2A type 3 OS=Rattus norvegicus OX=10116 PE=2 SV=3	7	FALSE	RAT	1	3	1	130	14.1	11.05	8.21	1	8.315	0.766	1.1324e-07	0.00692826	116985	89585.2	972670	3.45	7.94	4.61	119581	111722	116985	85016.1	99203.9	89585.2	972670	909318	994408	116079	107624	110115	85016.1	95765	82335.3	927210	848630	899610	1
			FALSE	Master Protein	Q8R512	UBX domain-containing protein 11 OS=Rattus norvegicus OX=10116 GN=Ubxn11 PE=1 SV=1	2	FALSE	RAT	1	3	1	485	54.7	4.97	7.95	1	1000						253798			14.47							246105	253798	317946							234602	236859	287636	1
			FALSE	Master Protein	P02454	Collagen alpha-1(I) chain OS=Rattus norvegicus OX=10116 GN=Col1a1 PE=1 SV=5	1	FALSE	RAT	1	3	1	1453	137.9	5.92	7.71	1	1000						114016			5.49							114016	108540	121074							108687	101296	109532	1
			FALSE	Master Protein	Q8R5M3	Leucine-rich repeat-containing protein 15 OS=Rattus norvegicus OX=10116 GN=Lrrc15 PE=2 SV=1	2	FALSE	RAT	1	3	1	578	64.1	6.37	7.48	1	1000						17840.9			9.56								16672.7	19091								15560	17271	1
			FALSE	Master Protein	P16617	Phosphoglycerate kinase 1 OS=Rattus norvegicus OX=10116 GN=Pgk1 PE=1 SV=2	4	FALSE	RAT	1	3	1	417	44.5	7.9	7.23	1	0.001	0.001			17085.9			81.1			45308.2	17085.9	8637.77							43981.3	16459.1	8130.53							1
			FALSE	Master Protein	P40112	Proteasome subunit beta type-3 OS=Rattus norvegicus OX=10116 GN=Psmb3 PE=1 SV=1	8	FALSE	RAT	1	3	1	205	22.9	6.55	7.06	1	1.618	1.051	0.00844355	0.998379	14404.6	15137.2	23305.1	6.01	8.26	14.59		13805	15030.2	13133.5	15137.2	15276.1	29245.1	23305.1	22587.1		13298.6	14147.6	13133.5	14612.4	14039.9	27878.3	21749.7	20433.8	1
			FALSE	Master Protein	D4A4T7	Desmoglein 1 OS=Rattus norvegicus OX=10116 GN=Dsg1 PE=4 SV=3	1	FALSE	RAT	1	3	1	1039	112.5	4.88	6.7	1	12.809	0.001			27862.3		356875			11.2			27862.3				304442	380372	356875			26226.2				290213	354986	322853	1
			FALSE	Master Protein	D3ZVU6	AVL9 cell migration-associated OS=Rattus norvegicus OX=10116 GN=Avl9 PE=1 SV=1	3	FALSE	RAT	1	2	1	649	72	6.19	6.53	1	0.859	0.581	0.185933	0.0118265	6.91009e+06	4.01327e+06	5.93812e+06	7.79	5.12	20	6.05992e+06	7.00029e+06	6.91009e+06	4.01327e+06	4.12762e+06	3.73401e+06	5.93812e+06	5.95972e+06	4.10178e+06	5882458	6743486	6.50431e+06	4.01327e+06	3.98454e+06	3.43182e+06	5.66059e+06	5.56197e+06	3.71075e+06	1
			FALSE	Master Protein	F1M6U0	WW and C2 domain-containing 1 OS=Rattus norvegicus OX=10116 GN=Wwc1 PE=1 SV=3	1	FALSE	RAT	1	3	1	1108	124.4	5.74	6.38	1		1000				17589.6			23.34					16888.4	25268.2	17589.6							16888.4	24392.3	16166.1				1
			FALSE	Master Protein	O08651	D-3-phosphoglycerate dehydrogenase OS=Rattus norvegicus OX=10116 GN=Phgdh PE=1 SV=3	3	FALSE	RAT	1	2	1	533	56.5	6.71	6.22	1	0.001	0.001			19548.9			78.7			47665.1	19548.9	8989.68							46269.2	18831.8	8461.78							1
			FALSE	Master Protein	Q5XIM9	T-complex protein 1 subunit beta OS=Rattus norvegicus OX=10116 GN=Cct2 PE=1 SV=3	3	FALSE	RAT	1	2	1	535	57.4	6.46	6.12	1	0.001	0.001			21725.2			46.05			30459.9	15495.2								29567.9	14926.8								1
			FALSE	Master Protein	P60203	Myelin proteolipid protein OS=Rattus norvegicus OX=10116 GN=Plp1 PE=1 SV=2	4	FALSE	RAT	1	3	1	277	30.1	8.35	6.01	1	0.942	1.555	0.501977	0.00465797	90773	141158	85509.3	8.99	11.97	3.93	100515	84106.2	90773	158036	141158	124244	85533.2	79822.5	85509.3	97571	81020.9	85442.6	158036	136264	114189	81535.6	74495.2	77357.5	1
			FALSE	Master Protein	P31977	Ezrin OS=Rattus norvegicus OX=10116 GN=Ezr PE=1 SV=3	2	FALSE	RAT	1	3	1	586	69.3	6.1	5.88	1	1000						76665.6			15.22							76665.6	72041	95429.1							73082.4	67233	86331.7	1
			FALSE	Master Protein	D3ZC55	Heat shock 70kDa protein 12A (Predicted), isoform CRA_a OS=Rattus norvegicus OX=10116 GN=Hspa12a PE=1 SV=1	3	FALSE	RAT	2	2	2	675	74.8	6.61	5.68	2	1.234	2.274			43142.6	98110.5	53222.6		7.46	31.46	43142.6			98110.5	86869	99960.8	69516.1	36183	53222.6	41879.2			98110.5	83857.7	91871.2	66267.1	33768.1	48148.8	1
			FALSE	Master Protein	D3ZGE2	Myeloperoxidase OS=Rattus norvegicus OX=10116 GN=Mpo PE=1 SV=1	2	FALSE	RAT	1	2	1	458	51.9	9.94	5.2	1	1000						98458.6			5.55							99477.5	98458.6	89794.1							94828.2	91887.5	81233.9	1
			FALSE	Master Protein	P31647	Sodium- and chloride-dependent GABA transporter 3 OS=Rattus norvegicus OX=10116 GN=Slc6a11 PE=1 SV=1	3	FALSE	RAT	1	2	1	627	69.9	6.98	5.08	1	1.567	2.53			15766.7	39891.1	24699.1		11.94			15766.7		47406.2	37970.8	39891.1		24699.1			15188.3		47406.2	36654.5	36662.8		23050.7		1
			FALSE	Master Protein	F1LWK7	Uncharacterized protein (Fragment) OS=Rattus norvegicus OX=10116 PE=1 SV=3	2	FALSE	RAT	1	2	1	600	67	8.51	5.04	1		1000				70500.9			41.59					114966	51008.9	70500.9							114966	49240.7	64795.4				1
			FALSE	Master Protein	D4ABK1	Synaptogyrin 3 OS=Rattus norvegicus OX=10116 GN=Syngr3 PE=1 SV=1	8	FALSE	RAT	1	2	1	199	21.4	9.04	4.76	1	1.178	3.078			15312.6	47139.1	18043.8		7.57	15.31		15312.6		47139.1	43184.8	50263.3	16186.1		20114.7		14750.9		47139.1	41687.8	46195.6	15429.6		18197.2	1
			FALSE	Master Protein	P28073	Proteasome subunit beta type-6 OS=Rattus norvegicus OX=10116 GN=Psmb6 PE=1 SV=3	4	FALSE	RAT	1	2	1	238	25.3	5	4.5	1	1.769	0.75	0.0184054	0.322824	34710.4	26025.4	61389.8	13.07	16.64	14.86	38080.1		31638.9	33053.9	24327.3	26025.4	61389.8	75934.6	57654.3	36964.9		29781	33053.9	23484	23919.2	58520.6	70866.8	52158	1
			FALSE	Master Protein	P21670	Proteasome subunit alpha type-4 OS=Rattus norvegicus OX=10116 GN=Psma4 PE=1 SV=1	4	FALSE	RAT	1	2	1	261	29.5	7.72	4.49	1	2.245	1.658	0.00167527	0.0132959	12882.6	21361.3	28918	20.55	10.65	5.63	15731.1	10391.4	12882.6	19363.7	23943.9	21361.3	30612.9	28918	27352.8	15270.4	10010.2	12126.1	19363.7	23113.9	19632.6	29182.1	26988.1	24745.2	1
			FALSE	Master Protein	P49655	ATP-sensitive inward rectifier potassium channel 10 OS=Rattus norvegicus OX=10116 GN=Kcnj10 PE=2 SV=1	5	FALSE	RAT	1	3	1	379	42.5	8.28	4.42	1		1000				71019.1			37.18						92961.8	54255.8								89739.3	49865				1
			FALSE	Master Protein	A0A0G2K6A9	Protein RUFY3 OS=Rattus norvegicus OX=10116 GN=Rufy3 PE=1 SV=1	2	FALSE	RAT	1	3	1	637	72	5.35	4.31	1	1.601	2.761	0.656911	0.104104	27951.5	77165.5	44758.9	64.7	21.65	30.6	17052.9		45815.6	60327	93690.9	77165.5	27055.8	44758.9	51351.9	16553.5		43125.2	60327	90443.1	70920.7	25791.3	41771.7	46456.5	1
			FALSE	Master Protein	Q3MHS9	Chaperonin containing Tcp1, subunit 6A (Zeta 1) OS=Rattus norvegicus OX=10116 GN=Cct6a PE=1 SV=1	3	FALSE	RAT	1	1	1	531	58	7.08	4.25	1	0.001	0.001			15106.3						15106.3									14664									1
			FALSE	Master Protein	P97838	Disks large-associated protein 3 OS=Rattus norvegicus OX=10116 GN=Dlgap3 PE=1 SV=2	2	FALSE	RAT	1	1	1	977	105.9	8.76	4.09	1		1000				46973.5									46973.5									45345.2					1
			FALSE	Master Protein	D3ZJ50	Plakophilin 3 OS=Rattus norvegicus OX=10116 GN=Pkp3 PE=1 SV=1	3	FALSE	RAT	2	2	2	822	89.8	9.51	4.06	2	1000						115189			26.52							143929	115189	83392.4							137202	107502	75442.4	1
			FALSE	Master Protein	P61515	Putative 60S ribosomal protein L37a OS=Rattus norvegicus OX=10116 GN=Rpl37a-ps1 PE=5 SV=2	20	FALSE	RAT	1	1	1	92	10.3	10.43	3.77	1	0.001	0.001			35882.1						35882.1									34831.3									1
			FALSE	Master Protein	Q6P3V8	Eukaryotic translation initiation factor 4A1 OS=Rattus norvegicus OX=10116 GN=Eif4a1 PE=1 SV=1	6	FALSE	RAT	1	1	1	406	46.1	5.48	3.65	1	0.001	0.001			29021.6			51.64			42556.9	19791.3								41310.6	19065.2								1
			FALSE	Master Protein	Q5U3Z7	Serine hydroxymethyltransferase OS=Rattus norvegicus OX=10116 GN=Shmt2 PE=1 SV=1	3	FALSE	RAT	1	1	1	504	55.7	8.21	3.57	1	0.001	0.001			18575.2			45.84			25999.7	13270.8								25238.3	12784								1
			FALSE	Master Protein	D4A9Q3	Uncharacterized protein OS=Rattus norvegicus OX=10116 PE=3 SV=1	19	FALSE	RAT	1	1	1	143	15.7	10.08	3.51	1	0.001	0.001			26905.1						26905.1									26117.2									1
			FALSE	Master Protein	P05197	Elongation factor 2 OS=Rattus norvegicus OX=10116 GN=Eef2 PE=1 SV=4	2	FALSE	RAT	1	1	1	858	95.2	6.83	3.29	1	0.001	0.001			14082.6						14082.6									13670.2									1
			FALSE	Master Protein	P04785	Protein disulfide-isomerase OS=Rattus norvegicus OX=10116 GN=P4hb PE=1 SV=2	2	FALSE	RAT	1	1	1	509	56.9	4.93	3.21	1	1000						31382.3			15.42							28128.2		35012.9							26813.6		31675	1
			FALSE	Master Protein	P34058	Heat shock protein HSP 90-beta OS=Rattus norvegicus OX=10116 GN=Hsp90ab1 PE=1 SV=4	3	FALSE	RAT	1	1	1	724	83.2	5.03	3.18	1	0.001	0.001			39501.1			69.67			67754.3	23029.4								65770.1	22184.6								1
			FALSE	Master Protein	P04642	L-lactate dehydrogenase A chain OS=Rattus norvegicus OX=10116 GN=Ldha PE=1 SV=1	5	FALSE	RAT	1	1	1	332	36.4	8.27	3.02	1	0.001	0.001			14901.3			36.3			19375.8	11460.2								18808.4	11039.8								1
			FALSE	Master Protein	Q6B345	Protein S100-A11 OS=Rattus norvegicus OX=10116 GN=S100a11 PE=3 SV=1	16	FALSE	RAT	1	1	1	98	11.1	5.9	2.96	1	0.001	0.001			15001.9						15001.9									14562.5									1
			FALSE	Master Protein	Q3T1J4	Polypeptide N-acetylgalactosaminyltransferase OS=Rattus norvegicus OX=10116 GN=Galnt3 PE=2 SV=1	3	FALSE	RAT	1	1	1	633	73	7.99	2.88	1	0.652	0.528	0.0842382	0.0319618	220603	116484	143822	5.95	7.72	17.85		211503	230094	123029	110287		126681		163283		203744	216583	123029	106464		120760		147717	1
			FALSE	Master Protein	P97837	Disks large-associated protein 2 OS=Rattus norvegicus OX=10116 GN=Dlgap2 PE=1 SV=3	1	FALSE	RAT	1	1	1	1059	118.9	6.77	2.87	1																													1
			FALSE	Master Protein	D3ZPV8	Gamma-glutamyl cyclotransferase OS=Rattus norvegicus OX=10116 GN=Ggct PE=1 SV=1	6	FALSE	RAT	1	1	1	188	21.2	5.44	2.85	1	1.401	2.13		0.00171653	97368.3	207397	136381	11.24	4.55		97368.3	80498.4	99429.4	212260	207397	194253		136381		94516.9	77545.4	93590.6	212260	200207	178532		127279		1
			FALSE	Master Protein	G3V826	Transketolase OS=Rattus norvegicus OX=10116 GN=Tkt PE=1 SV=1	3	FALSE	RAT	1	1	1	655	71.1	7.62	2.85	1	0.001	0.001			20971.5			51.48			30711.4	14320.5								29812	13795.2								1
			FALSE	Master Protein	A0A0G2KA35	Uncharacterized protein OS=Rattus norvegicus OX=10116 PE=3 SV=1	7	FALSE	RAT	1	1	1	162	17.9	8.54	2.75	1	1000						83115.5			9.24							83115.5	71072	84396.1							79230.9	66328.7	76350.5	1
			FALSE	Master Protein	F1M1B3	WASH complex subunit 5 OS=Rattus norvegicus OX=10116 GN=Washc5 PE=1 SV=2	2	FALSE	RAT	1	1	1	1159	134.1	7.47	2.74	1	1.137	0.491	0.522231	0.502617	111121	54546.5	126397	48.69	15.34	3.29	42852.4	111121	131058	48918.5		60821.9	121476	129714	126397	41597.5	107044	123362	48918.5		55899.8	115798	121057	114347	1
			FALSE	Master Protein	Q6P9Y4	ADP/ATP translocase 1 OS=Rattus norvegicus OX=10116 GN=Slc25a4 PE=1 SV=1	4	FALSE	RAT	1	1	1	298	32.9	9.74	2.74	1	1.579	2.542	0.372965	0.018913	23255.5	59114.3	36716	36.23	7.04	11.9	39345.7	23255.5	20802.8	66433.7	58785.4	59114.3	39947.4	33746.1		38193.4	22402.4	19581.2	66433.7	56747.6	54330.4	38080.3	31493.9		1
			FALSE	Master Protein	M0RD14	Pyruvate kinase OS=Rattus norvegicus OX=10116 GN=LOC100362738 PE=3 SV=2	2	FALSE	RAT	1	1	1	486	52.7	7.83	2.72	1	1000						42623.1			9.79							45683.1		39768.1							43548		35976.9	1
			FALSE	Master Protein	Q6W3B0	Desmoglein-4 OS=Rattus norvegicus OX=10116 GN=Dsg4 PE=1 SV=1	1	FALSE	RAT	1	1	1	1040	114.3	4.72	2.67	1	1000						595227			6.82							546048	595227	625714							520527	555502	566064	1
			FALSE	Master Protein	P25113	Phosphoglycerate mutase 1 OS=Rattus norvegicus OX=10116 GN=Pgam1 PE=1 SV=4	6	FALSE	RAT	1	1	1	254	28.8	7.18	2.6	1	0.001	0.001			20389						20389									19791.9									1
			FALSE	Master Protein	D3ZKA0	Serine (Or cysteine) peptidase inhibitor, clade B (Ovalbumin), member 13 (Predicted) OS=Rattus norvegicus OX=10116 GN=Serpinb13 PE=3 SV=1	3	FALSE	RAT	1	1	1	389	44.2	5.92	2.47	1	1000						125220			14.44							115280	151800	125220							109892	141669	113282	1
			FALSE	Master Protein	B2RYL1	Decreased expression in renal and prostate cancer protein OS=Rattus norvegicus OX=10116 GN=Derpc PE=1 SV=1	2	FALSE	RAT	1	1	1	533	52.1	12.32	2.45	1	2.427	3.203			31692.1	101518	76913.2		5.16	18.5			31692.1	102160	93016.3	101518	82664.6	57177.3	76913.2			29831.1	102160	89791.8	93302.4	78801	53361.3	69580.9	1
			FALSE	Master Protein	A0A0G2KAN1	Collagen, type I, alpha 2 OS=Rattus norvegicus OX=10116 GN=NEWGENE_621351 PE=1 SV=1	1	FALSE	RAT	1	1	1	1372	129.5	9.29	2.41	1	11.347	0.001	0.00206501		23436.1		265925	35.25		6.58	30232.3		18167.7				239637	265925	271589	29346.9		17100.8				228437	248177	245698	1
			FALSE	Master Protein	D4A987	Cdc42 GTPase-activating protein (Predicted) OS=Rattus norvegicus OX=10116 GN=Arhgap31 PE=1 SV=1	1	FALSE	RAT	1	1	1	1428	155.4	5.57	2.26	1	0.563	0.691	0.00762834	0.0251696	35321.6	24422.5	19895.2	10.75	13.53	11.92	30139.5	37257.8	35321.6	19694.6	25658.9	24422.5	18309.4	23091.3	19895.2	29256.8	35891	33247.4	19694.6	24769.4	22446	17453.7	21550.2	17998.5	1
			FALSE	Master Protein	P63245	Receptor of activated protein C kinase 1 OS=Rattus norvegicus OX=10116 GN=Rack1 PE=1 SV=3	9	FALSE	RAT	1	1	1	317	35.1	7.69	2.18	1																													1
			FALSE	Master Protein	G3V6B0	Pyridoxal-dependent decarboxylase domain-containing 1 OS=Rattus norvegicus OX=10116 GN=Pdxdc1 PE=1 SV=1	1	FALSE	RAT	1	3	1	785	86.9	5.53	2.07	1	1.935	2.349	0.00352072	0.0014575	277330	651432	536762	9.51	9.91	10.41	277330	272476	322627	607270	698807		456387	536762	558667	269208	262480	303681	607270	674582		435056	500939	505408	1
			FALSE	Master Protein	P23565	Alpha-internexin OS=Rattus norvegicus OX=10116 GN=Ina PE=1 SV=2	2	FALSE	RAT	1	1	1	505	56.1	5.22	2.05	1	1000	1000				44450.4	20139.2		10.14					38348.2	46841.8	44450.4			20139.2				38348.2	45218	40853.2			18219.3	1
			FALSE	Master Protein	P62832	60S ribosomal protein L23 OS=Rattus norvegicus OX=10116 GN=Rpl23 PE=2 SV=1	13	FALSE	RAT	1	1	1	140	14.9	10.51	1.95	1	0.001	0.001			5958.5			29.16			9454.74	5958.5	5810.38							9177.85	5739.91	5469.17							1
			FALSE	Master Protein	G3V6A0	Platelet-derived growth factor receptor alpha OS=Rattus norvegicus OX=10116 GN=Pdgfra PE=1 SV=1	1	FALSE	RAT	1	1	1	1088	122.6	5.17	1.94	1	1.145	1.105	0.703243	0.874278	26229.8	28987.9	30044.4	20.73	13.72	21.02	22629.9		30402.4	26300.4		31950.1	30044.4	25028.7	37959.9	21967.2		28617.1	26300.4		29364.5	28640.2	23358.3	34341.1	1
			FALSE	Master Protein	C0HL12	Adhesion G protein-coupled receptor B1 OS=Rattus norvegicus OX=10116 GN=Adgrb1 PE=1 SV=1	1	FALSE	RAT	1	1	1	1577	172.8	7.66	1.9	1	1.354	1.694	0.212399		191231	323919	258912	6.68		26.16		182405	200485			323919	258912	255728	394618		175714	188712			297705	246811	238661	356998	1
			FALSE	Master Protein	Q9EQS0	Transaldolase OS=Rattus norvegicus OX=10116 GN=Taldo1 PE=1 SV=2	2	FALSE	RAT	1	1	1	337	37.4	7.03	1.85	1	2.328	0.001			16005.7		37263.6			12.27	16005.7						42348.1	33138.4	37263.6	15536.9						40368.8	30926.8	33711.2	1
			FALSE	Master Protein	P63329	Serine/threonine-protein phosphatase 2B catalytic subunit alpha isoform OS=Rattus norvegicus OX=10116 GN=Ppp3ca PE=1 SV=1	2	FALSE	RAT	1	1	1	521	58.6	5.86	1.76	1	0.001	0.001			17599.6							17599.6									16953.9								1
			FALSE	Master Protein	P18420	Proteasome subunit alpha type-1 OS=Rattus norvegicus OX=10116 GN=Psma1 PE=1 SV=2	3	FALSE	RAT	1	1	1	263	29.5	6.61	1.72	1	1000	1000				37181.2	58124		13.33	9.94					40869.2	33826	48822	58124	58500.8					39452.5	31088.5	46540.2	54244.9	52923.8	1

## Sheet: Fig8d
Figure 8d	FRET/FLIM competition assay
	eGFP lifetime (ns)		Probe	Probe OFF	+Xph20-ETWV	+Xph0-ETWV
	each data point corresponds to the averaged lifetime measured for a cell		2.41	2.51	2.55	2.45
			2.41	2.5	2.51	2.45
			2.47	2.51	2.47	2.42
			2.4	2.57	2.49	2.47
			2.49	2.55	2.47	2.46
			2.43	2.57	2.44	2.47
			2.43	2.51	2.44	2.42
			2.44	2.56	2.48	2.37
			2.44	2.52	2.47	2.44
			2.43	2.59	2.47	2.44
			2.34	2.57	2.56	2.42
			2.39	2.56	2.51	2.47
			2.41	2.55	2.47	2.41
			2.42	2.55	2.44	2.36
			2.44	2.5	2.47	2.37
			2.42	2.59	2.44	2.41
			2.41	2.5	2.57	2.3
			2.42	2.52	2.47	2.41
			2.45	2.52	2.47	2.44
			2.42	2.55	2.57	2.39
				2.53	2.48
					2.47

[truncated: 17 more sheets: Fig8e, Fig8f, SuppFig5b, SuppFig14, SuppFig15, SuppFig16, SuppFig17, SuppFig18, SuppFig19, SuppFig20, SuppFig23b, SuppFig26c, SuppFig28a, SuppFig28b, SuppFig28c, SuppFig28d, SuppFig31c]
